# Supplementary material
Source: publisher figshare collection journal article supplement (https://frontiersin.figshare.com/ndownloader/files/31716020)
Supplement: Supplementary file [file 31716020]

*Supplementary Material*

-

*File 1 – Tables*

Table S1: Summary of meta-analytic results for cognitive training interventions

color-coding: black = significant effect, grey = no significant effect

\* = significant at  $p \leq 0.05$ , \*\* = significant at  $p \leq 0.01$ 

Abbreviations: ADL = Activities of daily living, CI = confidence interval, g = Hedge's g, GRADE = Grading of Recommendations Assessment, Development and Evaluation, HOA = healthy older adults; k = number of studies; n = number of participants; NR = not reported, MD = mean difference (absolut), mNCD = mild neurocognitive disorder, SMD = standardized mean difference

| Reference                  | Study Characteristics                                                                                                                                                                                                                                                                                                                                                                                                                                                                                                                                                                                                                                           | Outcomes                                                                                                                                                                                                                                                                                                                                                                                                    |                                                                                                                                                                                                                                                                                                                                                                                                                                                                                                                                                                                                                       |                                                                                                                                                                                                                                                                                                                                                                                                                                                                |       |
|----------------------------|-----------------------------------------------------------------------------------------------------------------------------------------------------------------------------------------------------------------------------------------------------------------------------------------------------------------------------------------------------------------------------------------------------------------------------------------------------------------------------------------------------------------------------------------------------------------------------------------------------------------------------------------------------------------|-------------------------------------------------------------------------------------------------------------------------------------------------------------------------------------------------------------------------------------------------------------------------------------------------------------------------------------------------------------------------------------------------------------|-----------------------------------------------------------------------------------------------------------------------------------------------------------------------------------------------------------------------------------------------------------------------------------------------------------------------------------------------------------------------------------------------------------------------------------------------------------------------------------------------------------------------------------------------------------------------------------------------------------------------|----------------------------------------------------------------------------------------------------------------------------------------------------------------------------------------------------------------------------------------------------------------------------------------------------------------------------------------------------------------------------------------------------------------------------------------------------------------|-------|
|                            |                                                                                                                                                                                                                                                                                                                                                                                                                                                                                                                                                                                                                                                                 | Type                                                                                                                                                                                                                                                                                                                                                                                                        | Statistics                                                                                                                                                                                                                                                                                                                                                                                                                                                                                                                                                                                                            | Heterogeneity                                                                                                                                                                                                                                                                                                                                                                                                                                                  | GRADE |
| Bonnechère et al. 2020 [1] | <b>POPULATION:</b><br><input checked="" type="checkbox"/> healthy older adults<br><input type="checkbox"/> older adults with mNCD<br><input type="checkbox"/> older adults with Dementia<br><br><b>INTERVENTION:</b><br>commercially available computerized videogames to perform cognitive training<br><br><b>COMPARISON:</b><br>mixed (i.e. active or passive brain training)                                                                                                                                                                                                                                                                                 | <input checked="" type="checkbox"/> Cognition<br><br>processing speed**<br>working memory**<br>processing speed**<br>verbal memory*<br>attention<br>visuospatial abilities<br><br><input type="checkbox"/> Brain / Neurochemicals / HRV<br>NR<br><br><input type="checkbox"/> Physical Outcomes, Mobility, and Activities of Daily Living<br>NR<br><br><input type="checkbox"/> Psychosocial Outcomes<br>NR | $g^+ = 0.40, p < 0.001, 95\% \text{ CI } [0.20 \text{ to } 0.60], k = 8, n = 403$<br>$g^+ = 0.21, p = 0.001, 95\% \text{ CI } [0.08 \text{ to } 0.34], k = 9, n = 917$<br>$g^+ = 0.21, p = 0.006, 95\% \text{ CI } [0.06 \text{ to } 0.35], k = 9, n = 582$<br>$g^+ = 0.12, p = 0.031, 95\% \text{ CI } [0.01 \text{ to } 0.24], k = 7, n = 907$<br>$g^+ = 0.06, p = 0.59, 95\% \text{ CI } [-0.16 \text{ to } 0.29], k = 4, n = 299$<br>$g^+ = 0.03, p = 0.18, 95\% \text{ CI } [-0.16 \text{ to } 0.22], k = 4, n = 216$                                                                                            | <input type="checkbox"/> sign. <input checked="" type="checkbox"/> n.s.<br><input checked="" type="checkbox"/> sign. <input type="checkbox"/> n.s.<br><input type="checkbox"/> sign. <input checked="" type="checkbox"/> n.s.<br><input type="checkbox"/> sign. <input checked="" type="checkbox"/> n.s.<br><input checked="" type="checkbox"/> sign. <input type="checkbox"/> n.s.<br><input type="checkbox"/> sign. <input checked="" type="checkbox"/> n.s. |       |
| Chan et al. 2020 [2]       | <b>POPULATION:</b><br><input type="checkbox"/> healthy older adults<br><input checked="" type="checkbox"/> older adults with mNCD<br><input checked="" type="checkbox"/> older adults with Dementia<br><br><b>INTERVENTION:</b><br>cognitive training intervention (including (i) computerized cognitive training, (ii) cognitive training and rehabilitation and (iii) cognitive stimulation therapy, such as reminiscence therapy and reality orientation.<br><br><b>COMPARISON:</b><br>mixed (i.e. (i) the usual care (i.e. treatment as usual or waitlisted group); (ii) social and recreational activity; and (iii) alternative psychosocial intervention. | <input type="checkbox"/> Cognition<br><br><input type="checkbox"/> Brain / Neurochemicals / HRV<br>NR<br><br><input type="checkbox"/> Physical Outcomes, Mobility, and Activities of Daily Living<br>NR<br><br><input checked="" type="checkbox"/> Psychosocial Outcomes<br>depression**                                                                                                                    | $SMD^+ = -0.54, p < 0.0001, 95\% \text{ CI } [-0.77 \text{ to } -0.31], k = 36, n = 2,414$                                                                                                                                                                                                                                                                                                                                                                                                                                                                                                                            | <input checked="" type="checkbox"/> sign. <input type="checkbox"/> n.s.                                                                                                                                                                                                                                                                                                                                                                                        |       |
| Mansor et al. 2020 [3]     | <b>POPULATION:</b><br><input checked="" type="checkbox"/> healthy older adults<br><input type="checkbox"/> older adults with mNCD<br><input type="checkbox"/> older adults with Dementia<br><br><b>INTERVENTION:</b><br>videogames (exergames, brain training, action, strategy, and casual games)<br><br><b>COMPARISON:</b><br>mixed (passive (i.e. no-contact; k = 24) or active (e.g. watched a movie or a documentary, read a book, completed quizzes, or exercised; k = 9))                                                                                                                                                                                | <input checked="" type="checkbox"/> Cognition<br><br>updating memory*<br>inhibition*<br>reasoning<br>processing speed<br>shifting<br>attention<br>delayed memory<br><br><input type="checkbox"/> Brain / Neurochemicals / HRV<br>NR<br><br><input type="checkbox"/> Physical Outcomes, Mobility, and Activities of Daily Living<br>NR<br><br><input type="checkbox"/> Psychosocial Outcomes<br>NR           | $g^+ = 0.37, p = 0.02, 95\% \text{ CI } [0.07 \text{ to } 0.66], k = 23, n = 879$<br>$g^+ = 0.28, p = 0.02, 95\% \text{ CI } [0.02 \text{ to } 0.53], k = 20, n = 709$<br>$g^+ = 0.17, p = 0.45, 95\% \text{ CI } [-0.28 \text{ to } 0.62], k = 13, n = 523$<br>$g^+ = 0.15, p = 0.20, 95\% \text{ CI } [-0.08 \text{ to } 0.38], k = 21, n = 800$<br>$g^+ = 0.14, p = 0.46, 95\% \text{ CI } [-0.21 \text{ to } 0.50], k = 18, n = 693$<br>$g^+ = 0.08, p = 0.77, 95\% \text{ CI } [-0.47 \text{ to } 0.64], k = 11, n = 394$<br>$g^+ = -0.03, p = 0.90, 95\% \text{ CI } [-0.48 \text{ to } 0.42], k = 10, n = 387$ | <input checked="" type="checkbox"/> sign. <input type="checkbox"/> n.s.<br><input checked="" type="checkbox"/> sign. <input type="checkbox"/> n.s. |       |
|                            |                                                                                                                                                                                                                                                                                                                                                                                                                                                                                                                                                                                                                                                                 |                                                                                                                                                                                                                                                                                                                                                                                                             |                                                                                                                                                                                                                                                                                                                                                                                                                                                                                                                                                                                                                       |                                                                                                                                                                                                                                                                                                                                                                                                                                                                |       |

|                             |                                                                                                                                                                                                                                                                                                                                                                                                                                                                                                                                                                                                                         |                                                                                                                                                                                                                                                                                                                                                                                                                                                                                                                                                                                                                                                                                                                                                                                                                                                                                                                                                                                                                                                                                                                                                                                                                                                                                                                                                                                                                                                                                                                                                                                                                                                                                                                                                                                                                                                                                                                                                                                                                                                                                 |                                                                                                                                                                                                                                                                                                                                                                                                                                                                                                                                                                                                                                                                                                                                                                                                                                                                                                                                                                                                                                                                               |
|-----------------------------|-------------------------------------------------------------------------------------------------------------------------------------------------------------------------------------------------------------------------------------------------------------------------------------------------------------------------------------------------------------------------------------------------------------------------------------------------------------------------------------------------------------------------------------------------------------------------------------------------------------------------|---------------------------------------------------------------------------------------------------------------------------------------------------------------------------------------------------------------------------------------------------------------------------------------------------------------------------------------------------------------------------------------------------------------------------------------------------------------------------------------------------------------------------------------------------------------------------------------------------------------------------------------------------------------------------------------------------------------------------------------------------------------------------------------------------------------------------------------------------------------------------------------------------------------------------------------------------------------------------------------------------------------------------------------------------------------------------------------------------------------------------------------------------------------------------------------------------------------------------------------------------------------------------------------------------------------------------------------------------------------------------------------------------------------------------------------------------------------------------------------------------------------------------------------------------------------------------------------------------------------------------------------------------------------------------------------------------------------------------------------------------------------------------------------------------------------------------------------------------------------------------------------------------------------------------------------------------------------------------------------------------------------------------------------------------------------------------------|-------------------------------------------------------------------------------------------------------------------------------------------------------------------------------------------------------------------------------------------------------------------------------------------------------------------------------------------------------------------------------------------------------------------------------------------------------------------------------------------------------------------------------------------------------------------------------------------------------------------------------------------------------------------------------------------------------------------------------------------------------------------------------------------------------------------------------------------------------------------------------------------------------------------------------------------------------------------------------------------------------------------------------------------------------------------------------|
| Gates et al.<br>2020 [4]    | <p><b>POPULATION:</b></p> <p><input checked="" type="checkbox"/> healthy older adults<br/> <input type="checkbox"/> older adults with mNCD<br/> <input type="checkbox"/> older adults with Dementia</p> <p><b>INTERVENTION:</b></p> <p>computerized cognitive training for at least 12 weeks</p> <p><b>COMPARISON:</b></p> <p>(1) active control intervention (unguided computer- and/or screen-based tasks that are not a planned intervention. These tasks can involve watching educational videos or playing computer games, with no particular training component.)<br/> (2) inactive control (no intervention)</p> | <p><input checked="" type="checkbox"/> <b>Cognition</b></p> <p>speed of processing**<sup>(1)</sup> SMD<sup>+</sup> = - 0.63, p = 0.01, 95 % CI [- 1.14 to - 0.12], k = 2, n = 138<br/> global cognition*<sup>(1)</sup> SMD<sup>+</sup> = - 0.31, p = 0.02, 95 % CI [- 0.57 to - 0.05], k = 2, n = 232<br/> working memory<sup>(1)</sup> SMD<sup>+</sup> = - 0.17, p = 0.08, 95 % CI [- 0.36 to 0.02], k = 3, n = 392<br/> executive function<sup>(1)</sup> SMD<sup>+</sup> = - 0.04, p = 0.89, 95 % CI [- 0.61 to 0.53], k = 3, n = 230<br/> episodic memory<sup>(1)</sup> SMD<sup>+</sup> = 0.06, p = 0.57, 95 % CI [- 0.14 to 0.26], k = 4, n = 439<br/> episodic memory*<sup>(2)</sup> SMD<sup>+</sup> = - 0.90, p = 0.03, 95 % CI [- 1.73 to - 0.07], k = 1, n = 150<br/> speed of processing<sup>(2)</sup> SMD<sup>+</sup> = - 0.28, p = 0.31, 95 % CI [- 0.82 to 0.26], k = 2, n = 204<br/> verbal fluency<sup>(2)</sup> SMD<sup>+</sup> = - 0.11, p = 0.88, 95 % CI [- 1.58 to 1.36], k = 1, n = 150<br/> executive function<sup>(2)</sup> SMD<sup>+</sup> = - 0.08, p = 0.51, 95 % CI [- 0.31 to 0.15], k = 2, n = 292<br/> working memory<sup>(2)</sup> SMD<sup>+</sup> = - 0.08, p = 0.66, 95 % CI [- 0.43 to 0.27], k = 1, n = 60</p> <p><input type="checkbox"/> Brain / Neurochemicals / HRV</p> <p>NR</p> <p><input type="checkbox"/> Physical Outcomes, Mobility, and Activities of Daily Living</p> <p>NR</p> <p><input type="checkbox"/> Psychosocial Outcomes</p> <p>NR</p>                                                                                                                                                                                                                                                                                                                                                                                                                                                                                                                                                                                   | <p><input type="checkbox"/> sign. <input checked="" type="checkbox"/> n.s. very low<br/> <input type="checkbox"/> sign. <input checked="" type="checkbox"/> n.s. low<br/> <input type="checkbox"/> sign. <input checked="" type="checkbox"/> n.s. low<br/> <input checked="" type="checkbox"/> sign. <input type="checkbox"/> n.s. very low<br/> <input type="checkbox"/> sign. <input checked="" type="checkbox"/> n.s. low<br/> N/A <input type="checkbox"/> sign. <input checked="" type="checkbox"/> n.s. very low<br/> N/A <input type="checkbox"/> sign. <input checked="" type="checkbox"/> n.s. low<br/> N/A <input type="checkbox"/> sign. <input checked="" type="checkbox"/> n.s. low</p>                                                                                                                                                                                                                                                                                                                                                                          |
| Bahar-Fuchs et al. 2019 [5] | <p><b>POPULATION:</b></p> <p><input type="checkbox"/> healthy older adults<br/> <input checked="" type="checkbox"/> older adults with mNCD<br/> <input type="checkbox"/> older adults with Dementia</p> <p><b>INTERVENTION:</b></p> <p>cognitive training</p> <p><b>COMPARISON:</b></p> <p>mixed (i.e. "18 passive and 13 active control conditions, along with 15 alternative treatment conditions, including occupational therapy, mindfulness, reminiscence therapy, and others."[5])</p>                                                                                                                            | <p><input checked="" type="checkbox"/> <b>Cognition</b></p> <p>delayed memory** SMD<sup>+</sup> = 0.81, p = 0.002, 95 % CI [0.29 to 1.32], k = 11, n = 543<br/> executive function** SMD<sup>+</sup> = 0.75, p = 0, 95 % CI [0.28 to 1.22], k = 12, n = 511<br/> immediate memory** SMD<sup>+</sup> = 0.74, p &lt; 0.0001, 95 % CI [0.37 to 1.12], k = 18, n = 762<br/> language (naming)* SMD<sup>+</sup> = 0.62, p = 0.02, 95 % CI [0.11 to 1.12], k = 5, n = 311<br/> attention &amp; work. mem.* SMD<sup>+</sup> = 0.56, p = 0.02, 95 % CI [0.56 to 1.05], k = 12, n = 551<br/> verb. category fluency** SMD<sup>+</sup> = 0.52, p = 0, 95 % CI [0.23 to 0.81], k = 9, n = 475<br/> global cognition** SMD<sup>+</sup> = 0.42, p &lt; 0.0001, 95 % CI [0.23 to 0.62], k = 27, n = 1,389<br/> meta cognition SMD<sup>+</sup> = 0.50, p = 0.13, 95 % CI [-0.15 to 1.14], k = 2, n = 41<br/> processing speed SMD<sup>+</sup> = 0.22, p = 0.19, 95 % CI [-0.11 to 0.54], k = 6, n = 201<br/> verb. letter fluency SMD<sup>+</sup> = 0.22, p = 0.13, 95 % CI [-0.07 to 0.50], k = 12, n = 544</p> <p><input type="checkbox"/> Brain / Neurochemicals / HRV</p> <p>NR</p> <p><input checked="" type="checkbox"/> <b>Physical Outcomes, Mobility, and Activities of Daily Living</b></p> <p>capacity for ADLs SMD<sup>+</sup> = 0.12, p = 0.30, 95 % CI [- 0.11 to 0.35], k = 10, n = 687</p> <p><input checked="" type="checkbox"/> <b>Psychosocial Outcomes</b></p> <p>participants' mood SMD<sup>+</sup> = 0.72, p = 0.08, 95 % CI [- 0.1 to 1.54], k = 8, n = 577<br/> neuropsych. symptoms SMD<sup>+</sup> = 0.44, p = 0.27, 95 % CI [- 0.34 to 1.22], k = 6, n = 493<br/> quality of life SMD<sup>+</sup> = - 0.04, p = 0.81, 95 % CI [- 0.38 to 0.29], k = 5, n = 630</p>                                                                                                                                                                                                                                                                                                  | <p><input checked="" type="checkbox"/> sign. <input type="checkbox"/> n.s. very low<br/> <input checked="" type="checkbox"/> sign. <input type="checkbox"/> n.s.<br/> <input checked="" type="checkbox"/> sign. <input type="checkbox"/> n.s. moderate<br/> <input type="checkbox"/> sign. <input checked="" type="checkbox"/> n.s.<br/> <input checked="" type="checkbox"/> sign. <input type="checkbox"/> n.s.<br/> <input checked="" type="checkbox"/> sign. <input type="checkbox"/> n.s.</p> <p><input checked="" type="checkbox"/> sign. <input type="checkbox"/> n.s. low</p> <p><input checked="" type="checkbox"/> sign. <input type="checkbox"/> n.s. very low<br/> <input checked="" type="checkbox"/> sign. <input type="checkbox"/> n.s. <input checked="" type="checkbox"/><br/> sign. <input type="checkbox"/> n.s.</p> |
| Gates et al.<br>2019 [6]    | <p><b>POPULATION:</b></p> <p><input type="checkbox"/> healthy older adults<br/> <input checked="" type="checkbox"/> older adults with mNCD<br/> <input type="checkbox"/> older adults with Dementia</p> <p><b>INTERVENTION:</b></p> <p>computerized cognitive training for at least 12 weeks</p> <p><b>COMPARISON:</b></p> <p>(1) active control intervention (unguided computer- and/or screen-based tasks that are not a planned intervention. These tasks can involve watching educational videos or playing computer games, with no particular training component.)<br/> (2) inactive control (no intervention)</p> | <p><input checked="" type="checkbox"/> <b>Cognition</b></p> <p>working memory* <sup>(1)</sup> SMD<sup>+</sup> = - 0.88, p = 0.04, 95 % CI [- 1.73 to - 0.03], k = 3, n = 72<br/> episodic memory* <sup>(1)</sup> SMD<sup>+</sup> = - 0.79, p = 0.04, 95 % CI [- 1.54 to - 0.04], k = 5, n = 223<br/> global cognition* <sup>(1)</sup> SMD<sup>+</sup> = - 0.53, p = 0.05, 95 % CI [- 1.06 to - 0.01], k = 5, n = 407<br/> executive function <sup>(1)</sup> SMD<sup>+</sup> = - 0.31, p = 0.31, 95 % CI [- 0.90 to 0.28], k = 3, n = 150<br/> verbal fluency <sup>(1)</sup> SMD<sup>+</sup> = - 0.16, p = 0.60, 95 % CI [- 0.76 to 0.44], k = 3, n = 150<br/> speed of processing <sup>(1)</sup> SMD<sup>+</sup> = 0.20, p = 0.28, 95 % CI [- 0.16 to 0.56], k = 2, n = 119<br/> episodic memory* <sup>(2)</sup> MD<sup>+</sup> = - 2.70, p = 0.02, 95 % CI [- 5.00 to - 0.40], k = 1, n = 37<br/> executive function <sup>(2)</sup> MD<sup>+</sup> = - 2.70, p = 0.13, 95 % CI [- 6.21 to 0.81], k = 1, n = 37<br/> global cognition <sup>(2)</sup> MD<sup>+</sup> = - 0.36, p = 0.29, 95 % CI [- 0.30 to 1.02], k = 1, n = 37<br/> verbal fluency <sup>(2)</sup> MD<sup>+</sup> = 1.90, p = 0.56, 95 % CI [- 4.50 to 8.30], k = 1, n = 37</p> <p><input type="checkbox"/> Brain / Neurochemicals / HRV</p> <p>NR</p> <p><input checked="" type="checkbox"/> <b>Physical Outcomes, Mobility, and Activities of Daily Living</b></p> <p>funct. performance <sup>(1)</sup> SMD<sup>+</sup> = 0.09, p = 0.76, 95 % CI [-0.51 to 0.70], k = 2, n = 131<br/> funct. performance <sup>(2)</sup> MD<sup>+</sup> = 0.00, p = 1, 95 % CI [-0.48 to 0.48], k = 1, n = 37</p> <p><input checked="" type="checkbox"/> <b>Psychosocial Outcomes</b></p> <p>depression <sup>(1)</sup> SMD<sup>+</sup> = -0.77, p = 0.24, 95 % CI [- 2.07 to 0.52], k = 3, n = 101<br/> quality of life <sup>(1)</sup> MD<sup>+</sup> = 0.40, p = 0.73, 95 % CI [- 1.85 to 2.65], k = 1, n = 19<br/> depression* <sup>(2)</sup> MD<sup>+</sup> = -1.30, p = 0.05, 95 % CI [- 2.61 to 0.01], k = 1, n = 37</p> | <p><input type="checkbox"/> sign. <input checked="" type="checkbox"/> n.s. very low<br/> <input checked="" type="checkbox"/> sign. <input type="checkbox"/> n.s. very low<br/> <input checked="" type="checkbox"/> sign. <input type="checkbox"/> n.s. very low<br/> <input type="checkbox"/> sign. <input checked="" type="checkbox"/> n.s. very low<br/> <input type="checkbox"/> sign. <input checked="" type="checkbox"/> n.s. low<br/> <input type="checkbox"/> sign. <input checked="" type="checkbox"/> n.s. low<br/> N/A <input type="checkbox"/> sign. <input checked="" type="checkbox"/> n.s. very low<br/> N/A <input type="checkbox"/> sign. <input checked="" type="checkbox"/> n.s. very low<br/> N/A <input type="checkbox"/> sign. <input checked="" type="checkbox"/> n.s. very low<br/> N/A <input type="checkbox"/> sign. <input checked="" type="checkbox"/> n.s. very low</p> <p>NR NR<br/> N/A very low</p> <p><input checked="" type="checkbox"/> sign. <input type="checkbox"/> n.s. low<br/> N/A NR<br/> N/A NR</p>                                 |
|                             |                                                                                                                                                                                                                                                                                                                                                                                                                                                                                                                                                                                                                         |                                                                                                                                                                                                                                                                                                                                                                                                                                                                                                                                                                                                                                                                                                                                                                                                                                                                                                                                                                                                                                                                                                                                                                                                                                                                                                                                                                                                                                                                                                                                                                                                                                                                                                                                                                                                                                                                                                                                                                                                                                                                                 |                                                                                                                                                                                                                                                                                                                                                                                                                                                                                                                                                                                                                                                                                                                                                                                                                                                                                                                                                                                                                                                                               |

|                           |                                                                                                                                                                                                                                                                                                                                                                                                                                                                                                     |                                                                                                                                                                                                                                                                                                                                                                                                                                                                                                                                                                                                                                                                                                                                                                                                                                                                                                                                                                                                                                                                                                                                                                                                                                                                                                                |
|---------------------------|-----------------------------------------------------------------------------------------------------------------------------------------------------------------------------------------------------------------------------------------------------------------------------------------------------------------------------------------------------------------------------------------------------------------------------------------------------------------------------------------------------|----------------------------------------------------------------------------------------------------------------------------------------------------------------------------------------------------------------------------------------------------------------------------------------------------------------------------------------------------------------------------------------------------------------------------------------------------------------------------------------------------------------------------------------------------------------------------------------------------------------------------------------------------------------------------------------------------------------------------------------------------------------------------------------------------------------------------------------------------------------------------------------------------------------------------------------------------------------------------------------------------------------------------------------------------------------------------------------------------------------------------------------------------------------------------------------------------------------------------------------------------------------------------------------------------------------|
| Vaportzis et al. 2019 [7] | <p><b>POPULATION:</b></p> <p><input checked="" type="checkbox"/> healthy older adults<br/> <input type="checkbox"/> older adults with mNCD<br/> <input type="checkbox"/> older adults with Dementia</p> <p><b>INTERVENTION:</b></p> <p>video games, computer training, reading and arithmetic problem solving, and brain-computer interface</p> <p><b>COMPARISON:</b></p> <p>(1) active control intervention (e.g. stretching or balance classes)<br/> (2) passive control (no intervention)</p>    | <p><input checked="" type="checkbox"/> <b>Cognition</b></p> <p>executive function <sup>(1)</sup> SMD<sup>+</sup> = 0.63, p = 0.20, 95 % CI [- 0.33 to 1.59], k = 2, n = 123<br/> Stroop interference <sup>(1)</sup> SMD<sup>+</sup> = - 0.12, p = 0.43, 95 % CI [- 0.41 to 0.17], k = 2, n = 268<br/> block design <sup>(2)</sup> SMD<sup>+</sup> = 0.13, p = 0.57, 95 % CI [- 0.33 to 0.59], k = 2, n = 74<br/> digit substitution <sup>(2)</sup> SMD<sup>+</sup> = 0.13, p = 0.58, 95 % CI [- 0.33 to 0.59], k = 2, n = 74<br/> digit span <sup>(2)</sup> SMD<sup>+</sup> = 0.10, p = 0.67, 95 % CI [- 0.36 to 0.55], k = 2, n = 74</p> <p><input type="checkbox"/> sign. <input checked="" type="checkbox"/> n.s.<br/> <input type="checkbox"/> sign. <input checked="" type="checkbox"/> n.s.</p> <p><input type="checkbox"/> <b>Brain / Neurochemicals / HRV</b></p> <p>NR</p> <p><input type="checkbox"/> <b>Physical Outcomes, Mobility, and Activities of Daily Living</b></p> <p>NR</p> <p><input type="checkbox"/> <b>Psychosocial Outcomes</b></p> <p>NR</p> |
| Zhang et al. 2019 [8]     | <p><b>POPULATION:</b></p> <p><input type="checkbox"/> healthy older adults<br/> <input checked="" type="checkbox"/> older adults with mNCD<br/> <input type="checkbox"/> older adults with Dementia</p> <p><b>INTERVENTION:</b></p> <p>computerized cognitive training</p> <p><b>COMPARISON:</b></p> <p>mixed (i.e. active (interventions that controlled for non-specific therapeutic effects) or passive (waiting list conditions, treatment as usual or a non-matched minimal intervention))</p> | <p><input checked="" type="checkbox"/> <b>Cognition</b></p> <p>working memory** g<sup>+</sup> = 0.39, p = 0.004, 95 % CI [0.12 to 0.66], k = 5, n = 165<br/> memory** g<sup>+</sup> = 0.30, p = 0.002, 95 % CI [0.11 to 0.50], k = 13, n = 477<br/> global cognition* g<sup>+</sup> = 0.23, p = 0.03, 95 % CI [0.03 to 0.44], k = 11, n = 503<br/> executive function g<sup>+</sup> = 0.20, p = 0.08, 95 % CI [- 0.03 to 0.43], k = 11, n = 353</p> <p><input type="checkbox"/> sign. <input checked="" type="checkbox"/> n.s.<br/> <input checked="" type="checkbox"/> sign. <input type="checkbox"/> n.s.<br/> <input type="checkbox"/> sign. <input checked="" type="checkbox"/> n.s.<br/> <input checked="" type="checkbox"/> sign. <input type="checkbox"/> n.s.</p> <p><input type="checkbox"/> <b>Brain / Neurochemicals / HRV</b></p> <p>NR</p> <p><input type="checkbox"/> <b>Physical Outcomes, Mobility, and Activities of Daily Living</b></p> <p>NR</p> <p><input type="checkbox"/> <b>Psychosocial Outcomes</b></p> <p>NR</p>                                                                                                                                                                                                                                                                    |
| Liang et al. 2018 [9]     | <p><b>POPULATION:</b></p> <p><input type="checkbox"/> healthy older adults<br/> <input checked="" type="checkbox"/> older adults with mNCD<br/> <input type="checkbox"/> older adults with Dementia</p> <p><b>INTERVENTION:</b></p> <p>computerized cognitive training</p> <p><b>COMPARISON:</b></p> <p>mixed (cognitive interventions, control group alone or in any combination)</p>                                                                                                              | <p><input checked="" type="checkbox"/> <b>Cognition</b></p> <p>global cognition SMD<sup>+</sup> = - 0.02, p = 0.588, 95 % CI [- 0.31 to 0.27], k = 4</p> <p><input type="checkbox"/> sign. <input checked="" type="checkbox"/> n.s.</p> <p><input type="checkbox"/> <b>Brain / Neurochemicals / HRV</b></p> <p>NR</p> <p><input type="checkbox"/> <b>Physical Outcomes, Mobility, and Activities of Daily Living</b></p> <p>NR</p> <p><input checked="" type="checkbox"/> <b>Psychosocial Outcomes</b></p> <p>neuropsych. symptoms SMD<sup>+</sup> = -0.61, p = NR, 95 % CI [-1.29 to 0.06], k = 1</p> <p>NR</p>                                                                                                                                                                                                                                                                                                                                                                                                                                                                                                                                                                                                                                                                                               |
| Sala et al. 2018 [10]     | <p><b>POPULATION:</b></p> <p><input checked="" type="checkbox"/> healthy older adults<br/> <input type="checkbox"/> older adults with mNCD<br/> <input type="checkbox"/> older adults with Dementia</p> <p><b>INTERVENTION:</b></p> <p>video game playing</p> <p><b>COMPARISON:</b></p> <p>mixed (active or passive control conditions)</p>                                                                                                                                                         | <p><input checked="" type="checkbox"/> <b>Cognition</b></p> <p>intelligence/reasoning** g<sup>-</sup> = -0.63, p = 0.004, 95 % CI [-1.06 to - 0.20], k = 15<br/> memory g<sup>-</sup> = -0.01, p = 0.92, 95 % CI [-0.24 to 0.22], k = 22<br/> visual attention g<sup>-</sup> = 0.00, p = 0.97, 95 % CI [-0.21 to 0.22], k = 26<br/> spatial ability g<sup>-</sup> = 0.06, p = 0.65, 95 % CI [-0.20 to 0.33], k = 12<br/> cognitive control g<sup>-</sup> = 0.07, p = 0.54, 95 % CI [-0.15 to 0.29], k = 17</p> <p>NR<br/>NR<br/>NR<br/>NR<br/>NR</p> <p><input type="checkbox"/> <b>Brain / Neurochemicals / HRV</b></p> <p>NR</p> <p><input type="checkbox"/> <b>Physical Outcomes, Mobility, and Activities of Daily Living</b></p> <p>NR</p> <p><input type="checkbox"/> <b>Psychosocial Outcomes</b></p> <p>NR</p>                                                                                                                                                                                                                                                                                                                                                                                                                                                                                         |
|                           |                                                                                                                                                                                                                                                                                                                                                                                                                                                                                                     |                                                                                                                                                                                                                                                                                                                                                                                                                                                                                                                                                                                                                                                                                                                                                                                                                                                                                                                                                                                                                                                                                                                                                                                                                                                                                                                |

|                                      |                                                                                                                                                                                                                                                                                                                                                                                                                                                                                    |                                                                                                                                                                                                                                                                                                                                                                                                                                                                                                                                                                                                                                                                                                                                                                                                                                                                                                                                                                                                                                                                                                                                                                                                                                                                                                                                                                                                                                                                                                                                                                                                                                                                                                                                                                                                                                                                                                                                                                                                                                                                                                                                                                                                                                                                                                                                                                                                                                                                                                                                                                                                                                                                                                                                                                                                                                                                                                                                                                                                                                                                                                                                                                                                                                                                                                                                                                                                                                                                                                                                                                                                                                                                                                                                                                                                                                                                                                                                                                                                                                                                                 |
|--------------------------------------|------------------------------------------------------------------------------------------------------------------------------------------------------------------------------------------------------------------------------------------------------------------------------------------------------------------------------------------------------------------------------------------------------------------------------------------------------------------------------------|---------------------------------------------------------------------------------------------------------------------------------------------------------------------------------------------------------------------------------------------------------------------------------------------------------------------------------------------------------------------------------------------------------------------------------------------------------------------------------------------------------------------------------------------------------------------------------------------------------------------------------------------------------------------------------------------------------------------------------------------------------------------------------------------------------------------------------------------------------------------------------------------------------------------------------------------------------------------------------------------------------------------------------------------------------------------------------------------------------------------------------------------------------------------------------------------------------------------------------------------------------------------------------------------------------------------------------------------------------------------------------------------------------------------------------------------------------------------------------------------------------------------------------------------------------------------------------------------------------------------------------------------------------------------------------------------------------------------------------------------------------------------------------------------------------------------------------------------------------------------------------------------------------------------------------------------------------------------------------------------------------------------------------------------------------------------------------------------------------------------------------------------------------------------------------------------------------------------------------------------------------------------------------------------------------------------------------------------------------------------------------------------------------------------------------------------------------------------------------------------------------------------------------------------------------------------------------------------------------------------------------------------------------------------------------------------------------------------------------------------------------------------------------------------------------------------------------------------------------------------------------------------------------------------------------------------------------------------------------------------------------------------------------------------------------------------------------------------------------------------------------------------------------------------------------------------------------------------------------------------------------------------------------------------------------------------------------------------------------------------------------------------------------------------------------------------------------------------------------------------------------------------------------------------------------------------------------------------------------------------------------------------------------------------------------------------------------------------------------------------------------------------------------------------------------------------------------------------------------------------------------------------------------------------------------------------------------------------------------------------------------------------------------------------------------------------------------|
| <p>García-Casal et al. 2017 [11]</p> | <p><b>POPULATION:</b><br/> <input type="checkbox"/> healthy older adults<br/> <input checked="" type="checkbox"/> older adults with mNCD<br/> <input checked="" type="checkbox"/> older adults with Dementia</p> <p><b>INTERVENTION:</b><br/> computer-based cognitive interventions (i.e. cognitive recreation, cognitive rehabilitation, cognitive stimulation or cognitive training)</p> <p><b>COMPARISON:</b><br/> mixed (active and passive control, control populations)</p> | <p><input checked="" type="checkbox"/> <b>Cognition</b></p> <p>global cognition** SMD<sup>+</sup> = 0.69, p &lt; 0.0001, 95 % CI [0.37 to 1.02], k = 7, n = 81 <input type="checkbox"/> sign. <input checked="" type="checkbox"/> n.s.</p> <p><input type="checkbox"/> <b>Brain / Neurochemicals / HRV</b></p> <p>NR</p> <p><input type="checkbox"/> <b>Physical Outcomes, Mobility, and Activities of Daily Living</b></p> <p>NR</p> <p><input checked="" type="checkbox"/> <b>Psychosocial Outcomes</b></p> <p>depression** SMD<sup>+</sup> = 0.47, p = 0.003, 95 % CI [0.16 to 0.78], k = 6, n = 84 <input type="checkbox"/> sign. <input checked="" type="checkbox"/> n.s.<br/> anxiety* SMD<sup>+</sup> = 0.55, p = 0.03, 95 % CI [0.07 to 1.04], k = 2, n = 34 <input type="checkbox"/> sign. <input checked="" type="checkbox"/> n.s.<br/> ADL SMD<sup>+</sup> = 0.26, p = 0.11, 95 % CI [0.06 to 0.59] NR</p>                                                                                                                                                                                                                                                                                                                                                                                                                                                                                                                                                                                                                                                                                                                                                                                                                                                                                                                                                                                                                                                                                                                                                                                                                                                                                                                                                                                                                                                                                                                                                                                                                                                                                                                                                                                                                                                                                                                                                                                                                                                                                                                                                                                                                                                                                                                                                                                                                                                                                                                                                                                                                                                                                                                                                                                                                                                                                                                                                                                                                                                                                                                                                           |
| <p>Hill et al. 2017 [12]</p>         | <p><b>POPULATION:</b><br/> <input type="checkbox"/> healthy older adults<br/> <input checked="" type="checkbox"/> older adults with mNCD<br/> <input checked="" type="checkbox"/> older adults with Dementia</p> <p><b>INTERVENTION:</b><br/> computerized cognitive training</p> <p><b>COMPARISON:</b><br/> (1) active (e.g., sham CCT, psychoeducation), or pencil-and-paper cognitive training)<br/> (2) passive (no-contact, wait-list)</p>                                    | <p><input checked="" type="checkbox"/> <b>Cognition</b></p> <p>MNCD:<br/> pooled estimate**<sup>(1)</sup> g<sup>+</sup> = 0.40, p &lt; 0.001, 95 % CI [0.17 to 0.63], k = 11 <input type="checkbox"/> sign. <input checked="" type="checkbox"/> n.s.<br/> global cognition**<sup>(1)</sup> g<sup>+</sup> = 0.41, p &lt; 0.001, 95 % CI [0.03 to 0.75], k = 8 <input type="checkbox"/> sign. <input checked="" type="checkbox"/> n.s.<br/> pooled estimate**<sup>(2)</sup> g<sup>+</sup> = 0.32, p &lt; 0.001, 95 % CI [0.09 to 0.55], k = 6 <input type="checkbox"/> sign. <input checked="" type="checkbox"/> n.s.<br/> global cognition**<sup>(2)</sup> g<sup>+</sup> = 0.37, p &lt; 0.001, 95 % CI [0.02 to 0.72], k = 4 <input type="checkbox"/> sign. <input checked="" type="checkbox"/> n.s.<br/> working memory** g<sup>+</sup> = 0.74, p &lt; 0.001, 95 % CI [0.32 to 1.15], k = 9 <input checked="" type="checkbox"/> sign. <input type="checkbox"/> n.s.<br/> nonverbal learning** g<sup>+</sup> = 0.50, p &lt; 0.001, 95 % CI [0.25 to 0.76], k = 8 <input type="checkbox"/> sign. <input checked="" type="checkbox"/> n.s.<br/> attention** g<sup>+</sup> = 0.44, p &lt; 0.001, 95 % CI [0.20 to 0.68], k = 6 NR<br/> verbal memory** g<sup>+</sup> = 0.42, p &lt; 0.001, 95 % CI [0.21 to 0.63], k = 12 <input checked="" type="checkbox"/> sign. <input type="checkbox"/> n.s.<br/> verbal learning** g<sup>+</sup> = 0.39, p &lt; 0.002, 95 % CI [0.14 to 0.63], k = 11 <input checked="" type="checkbox"/> sign. <input type="checkbox"/> n.s.<br/> language g<sup>+</sup> = 0.41, p &gt; 0.05, 95 % CI [-0.10 to 0.92], k = 6 NR<br/> nonverbal memory g<sup>+</sup> = 0.20, p &gt; 0.05, 95 % CI [-0.03 to 0.43], k = 7 NR<br/> executive function g<sup>+</sup> = 0.20, p &gt; 0.05, 95 % CI [-0.05 to 0.44], k = 13 NR<br/> visuospatial skills g<sup>+</sup> = 0.18, p &gt; 0.05, 95 % CI [-0.23 to 0.60], k = 5 NR<br/> processing speed g<sup>+</sup> = 0.09, p &gt; 0.05, 95 % CI [-0.17 to 0.35], k = 7 NR</p> <p>Dementia:<br/> visuospatial skills* g<sup>+</sup> = 0.54, p = 0.02, 95 % CI [0.07 to 1.01], k = 3 NR<br/> pooled estimate * g<sup>+</sup> = 0.26, p = 0.05, 95 % CI [0.01 to 0.52], k = 11 <input type="checkbox"/> sign. <input checked="" type="checkbox"/> n.s.<br/> verbal learning g<sup>+</sup> = 0.42, p = 0.14, 95 % CI [-0.14 to 0.97], k = 4 NR<br/> global cognition g<sup>+</sup> = 0.31, p = 0.15, 95 % CI [-0.11 to 0.72], k = 7 NR<br/> non-verbal learning g<sup>+</sup> = 0.23, p = 0.50, 95 % CI [-0.43 to 0.90], k = 2 NR<br/> working memory g<sup>+</sup> = 0.22, p = 0.45, 95 % CI [-0.34 to 0.78], k = 4 NR<br/> verbal memory g<sup>+</sup> = 0.17, p = 0.42, 95 % CI [-0.25 to 0.59], k = 9 NR<br/> processing speed g<sup>+</sup> = 0.11, p = 0.69, 95 % CI [-0.43 to 0.66], k = 2 NR<br/> language g<sup>+</sup> = 0.08, p = 0.67, 95 % CI [-0.29 to 0.44], k = 4 NR<br/> executive function g<sup>+</sup> = 0.02, p = 0.92, 95 % CI [-0.46 to 0.51], k = 5 NR<br/> non-verbal memory g<sup>+</sup> = -0.06, p = 0.80, 95 % CI [-0.06 to 0.38], k = 1 N/A<br/> attention g<sup>+</sup> = -0.19, p = 0.52, 95 % CI [-0.77 to 0.39], k = 2 NR</p> <p><input type="checkbox"/> <b>Brain / Neurochemicals / HRV</b></p> <p>NR</p> <p><input type="checkbox"/> <b>Physical Outcomes, Mobility, and Activities of Daily Living</b></p> <p>mNCD:<br/> instrumental ADL g<sup>+</sup> = 0.21, p &gt; 0.05, 95 % CI [- 0.18 to 0.61], k = 6 NR</p> <p>Dementia:<br/> ADL g<sup>+</sup> = 0.06, p = 0.84, 95 % CI [- 0.51 to 0.64], k = 2 NR<br/> instrumental ADL g<sup>+</sup> = - 0.24, p = 0.07, 95 % CI [- 0.50 to 0.02], k = 6 NR</p> <p><input checked="" type="checkbox"/> <b>Psychosocial Outcomes</b></p> <p>mNCD:<br/> psychosocial function* g<sup>+</sup> = 0.52, p = 0.045, 95 % CI [0.01 to 1.03], k = 8 <input checked="" type="checkbox"/> sign. <input type="checkbox"/> n.s.</p> <p>Dementia:<br/> psychosocial function g<sup>+</sup> = 0.60, p = 0.07, 95 % CI [- 0.05 to 1.25], k = 6 NR</p> |
| <p>Mewborn et al. 2017 [13]</p>      | <p><b>POPULATION:</b><br/> <input checked="" type="checkbox"/> healthy older adults<br/> <input checked="" type="checkbox"/> older adults with mNCD<br/> <input type="checkbox"/> older adults with Dementia</p> <p><b>INTERVENTION:</b><br/> single- and multi-domain cognitive training interventions</p> <p><b>COMPARISON:</b><br/> mixed (passive or active (e.g. education and support groups, completing questionnaires, and</p>                                             | <p><input checked="" type="checkbox"/> <b>Cognition</b></p> <p>pooled effect for HOA** g<sup>+</sup> = 0.314, p &lt; 0.001, 95 % CI [0.24 to 0.39], k = 134 <input checked="" type="checkbox"/> sign. <input type="checkbox"/> n.s.<br/> pooled effect for mNCD** g<sup>+</sup> = 0.336, p &lt; 0.001, 95 % CI [0.21 to 0.47], k = 38 <input checked="" type="checkbox"/> sign. <input type="checkbox"/> n.s.<br/> near transfer (mixed)** g<sup>+</sup> = 0.438, p &lt; 0.001, 95 % CI [0.36 to 0.52], k = 141 <input checked="" type="checkbox"/> sign. <input type="checkbox"/> n.s.<br/> far transfer (mixed)** g<sup>+</sup> = 0.145, p &lt; 0.001, 95 % CI [0.09 to 0.20], k = 138 <input checked="" type="checkbox"/> sign. <input type="checkbox"/> n.s.</p> <p><input type="checkbox"/> <b>Brain / Neurochemicals / HRV</b></p> <p>NR</p> <p><input type="checkbox"/> <b>Physical Outcomes, Mobility, and Activities of Daily Living</b></p> <p>NR</p>                                                                                                                                                                                                                                                                                                                                                                                                                                                                                                                                                                                                                                                                                                                                                                                                                                                                                                                                                                                                                                                                                                                                                                                                                                                                                                                                                                                                                                                                                                                                                                                                                                                                                                                                                                                                                                                                                                                                                                                                                                                                                                                                                                                                                                                                                                                                                                                                                                                                                                                                                                                                                                                                                                                                                                                                                                                                                                                                                                                                                                                                                                                 |

|                               |                                                                                                                                                                                                                                                                                                                                                                                                                                                                                                                                                                                                                                                  |                                                                                                                                                                                                                                                                                                                                                                                                                                                                                                                                                                                                                                                                                                                                                                                                                                                                                                                                                                                                                                                                                                                                                                                   |
|-------------------------------|--------------------------------------------------------------------------------------------------------------------------------------------------------------------------------------------------------------------------------------------------------------------------------------------------------------------------------------------------------------------------------------------------------------------------------------------------------------------------------------------------------------------------------------------------------------------------------------------------------------------------------------------------|-----------------------------------------------------------------------------------------------------------------------------------------------------------------------------------------------------------------------------------------------------------------------------------------------------------------------------------------------------------------------------------------------------------------------------------------------------------------------------------------------------------------------------------------------------------------------------------------------------------------------------------------------------------------------------------------------------------------------------------------------------------------------------------------------------------------------------------------------------------------------------------------------------------------------------------------------------------------------------------------------------------------------------------------------------------------------------------------------------------------------------------------------------------------------------------|
|                               | cognitive stimulation (e.g., computer games, puzzles, reading)) without statistically difference between the pooled estimate between these two control groups)                                                                                                                                                                                                                                                                                                                                                                                                                                                                                   | <input type="checkbox"/> Psychosocial Outcomes<br>NR                                                                                                                                                                                                                                                                                                                                                                                                                                                                                                                                                                                                                                                                                                                                                                                                                                                                                                                                                                                                                                                                                                                              |
| Shermann et al. 2017 [14]     | <b>POPULATION:</b><br><input type="checkbox"/> healthy older adults<br><input checked="" type="checkbox"/> older adults with mNCD<br><input type="checkbox"/> older adults with Dementia<br><br><b>INTERVENTION:</b><br>broad selection of cognitive training interventions (i.e. cognitive stimulation = 0/26 (0 %), restorative training = 8/26 (30.77%), compensatory training = 3/26 (11.54%), and multicomponent approaches = 15/26 (57.69%))<br><br><b>COMPARISON:</b><br>mixed (i.e. passive (received no training), waitlisted, or provided standard of care (57.69 %), or active (engaged in an active, non-trained program (42.31 %)). | <input checked="" type="checkbox"/> Cognition<br><br>memory (verbal)** $g^+ = 0.758, p < 0.001, 95\% \text{ CI } [0.382 \text{ to } 1.133], k = 15$<br>memory (pooled)** $g^+ = 0.659, p = 0.000, 95\% \text{ CI } [0.383 \text{ to } 0.936], k = 20$<br>working memory** $g^+ = 0.614, p = 0.000, 95\% \text{ CI } [0.285 \text{ to } 0.943], k = 12$<br>executive function* $g^+ = 0.575, p = 0.019, 95\% \text{ CI } [0.093 \text{ to } 1.056], k = 13$<br>memory (non-verbal)** $g^+ = 0.570, p = 0.006, 95\% \text{ CI } [0.160 \text{ to } 0.980], k = 5$<br>language** $g^+ = 0.511, p < 0.001, 95\% \text{ CI } [0.231 \text{ to } 0.790], k = 7$<br>overall** $g^+ = 0.454, p = 0.003, 95\% \text{ CI } [0.156 \text{ to } 0.753], k = 26$<br>global cognition** $g^+ = 0.216, p = 0.003, 95\% \text{ CI } [0.076 \text{ to } 0.356], k = 16$<br>processing speed $g^- = -0.434, p = 0.235, 95\% \text{ CI } [-1.150 \text{ to } 0.282], k = 6$<br><br><input type="checkbox"/> Brain / Neurochemicals / HRV<br>NR<br><input type="checkbox"/> Physical Outcomes, Mobility, and Activities of Daily Living<br>NR<br><input type="checkbox"/> Psychosocial Outcomes<br>NR |
| Melby-Lervåg et al. 2016 [15] | <b>POPULATION:</b><br><input checked="" type="checkbox"/> healthy older adults<br><input type="checkbox"/> older adults with mNCD<br><input type="checkbox"/> older adults with Dementia<br><br><b>INTERVENTION:</b><br>computerized working memory training<br><br><b>COMPARISON:</b><br>(1) treated (non-working memory training intervention of a similar type and of equivalent intensity and duration)<br>(2) untreated (no intervention)                                                                                                                                                                                                   | <input checked="" type="checkbox"/> Cognition<br><br>near-transfer ** (1) $g^+ = 0.76, p < 0.01, k = 4$<br>working memory (1) $g^+ = 0.28, p > 0.05, k = 6$<br>nonverbal abilities (1) $g^+ = -0.13, p > 0.05, k = 6$<br>near-transfer* (2) $g^+ = 1.37, p < 0.05, k = 7$<br>working memory** (2) $g^+ = 0.49, p < 0.01, k = 10$<br>nonverbal abilities* (2) $g^+ = 0.22, p < 0.05, k = 10$<br>visuo-spatial skills (2) $g^+ = 0.47, p > 0.01, k = 4$<br><br><input type="checkbox"/> Brain / Neurochemicals / HRV<br>NR<br><input type="checkbox"/> Physical Outcomes, Mobility, and Activities of Daily Living<br>NR<br><input type="checkbox"/> Psychosocial Outcomes<br>NR                                                                                                                                                                                                                                                                                                                                                                                                                                                                                                    |
| Toril et al. 2014 [16]        | <b>POPULATION:</b><br><input checked="" type="checkbox"/> healthy older adults<br><input type="checkbox"/> older adults with mNCD<br><input type="checkbox"/> older adults with Dementia<br><br><b>INTERVENTION:</b><br>video game training (i.e. commercial video games or combinations of classic cognitive tasks taken from commercial packages (e.g. Nintendo Brain Training, Brain Age, Big Brain Academy, etc.)<br><br><b>COMPARISON:</b><br>mixed (active control intervention and passive control (no intervention)) without significant difference in effect estimates between control conditions                                       | <input checked="" type="checkbox"/> Cognition<br><br>reaction time** $d^+ = 0.63, p < 0.01, 95\% \text{ CI } [0.42 \text{ to } 0.84]$<br>memory* $d^+ = 0.39, p < 0.05, 95\% \text{ CI } [0.01 \text{ to } 0.64]$<br>global cognition* $d^+ = 0.38, p < 0.05, 95\% \text{ CI } [0.13 \text{ to } 0.64]$<br>pooled effect** $d^+ = 0.37, p < 0.01, 95\% \text{ CI } [0.26 \text{ to } 0.48]$<br>attention** $d^+ = 0.37, p < 0.01, 95\% \text{ CI } [0.17 \text{ to } 0.57]$<br>executive function $d^+ = 0.16, p > 0.05, 95\% \text{ CI } [-0.10 \text{ to } 0.42]$<br><br><input type="checkbox"/> Brain / Neurochemicals / HRV<br>NR<br><input type="checkbox"/> Physical Outcomes, Mobility, and Activities of Daily Living<br>NR<br><input type="checkbox"/> Psychosocial Outcomes<br>NR                                                                                                                                                                                                                                                                                                                                                                                      |
|                               |                                                                                                                                                                                                                                                                                                                                                                                                                                                                                                                                                                                                                                                  |                                                                                                                                                                                                                                                                                                                                                                                                                                                                                                                                                                                                                                                                                                                                                                                                                                                                                                                                                                                                                                                                                                                                                                                   |

|                                     |                                                                                                                                                                                                                                                                                                                                                                                                                                                               |                                                                                                                                                                                                                                                                                                                                                                                                                                                                                                                                                                                                                                                                                                                                                                                                                                                                                                                                                                                                                                                                                                                                                                                                                                                                                                                                                                                                                                                                                                                                                                                                                                                                                                                                                                                                                                                                        |
|-------------------------------------|---------------------------------------------------------------------------------------------------------------------------------------------------------------------------------------------------------------------------------------------------------------------------------------------------------------------------------------------------------------------------------------------------------------------------------------------------------------|------------------------------------------------------------------------------------------------------------------------------------------------------------------------------------------------------------------------------------------------------------------------------------------------------------------------------------------------------------------------------------------------------------------------------------------------------------------------------------------------------------------------------------------------------------------------------------------------------------------------------------------------------------------------------------------------------------------------------------------------------------------------------------------------------------------------------------------------------------------------------------------------------------------------------------------------------------------------------------------------------------------------------------------------------------------------------------------------------------------------------------------------------------------------------------------------------------------------------------------------------------------------------------------------------------------------------------------------------------------------------------------------------------------------------------------------------------------------------------------------------------------------------------------------------------------------------------------------------------------------------------------------------------------------------------------------------------------------------------------------------------------------------------------------------------------------------------------------------------------------|
| <p>Lampit et al.<br/>2014 [17]</p>  | <p><b>POPULATION:</b><br/> <input checked="" type="checkbox"/> healthy older adults<br/> <input type="checkbox"/> older adults with mNCD<br/> <input type="checkbox"/> older adults with Dementia</p> <p><b>INTERVENTION:</b><br/> computerized cognitive training</p> <p><b>COMPARISON:</b><br/> mixed (active control intervention and passive control (no intervention)) without significant difference in effect estimates between control conditions</p> | <p><input checked="" type="checkbox"/> <b>Cognition</b></p> <p>processing speed** <math>g^+ = 0.31, p = 0.002, 95\% \text{ CI } [0.11 \text{ to } 0.50], k = 33</math><br/> nonverbal memory** <math>g^+ = 0.24, p = 0.002, 95\% \text{ CI } [0.09 \text{ to } 0.38], k = 13</math><br/> pooled effect** <math>g^+ = 0.22, p &lt; 0.001, 95\% \text{ CI } [0.15 \text{ to } 0.29], k = 52</math><br/> working memory** <math>g^+ = 0.22, p &lt; 0.001, 95\% \text{ CI } [0.09 \text{ to } 0.35], k = 28</math><br/> verbal memory* <math>g^+ = 0.16, p = 0.02, 95\% \text{ CI } [0.03 \text{ to } 0.29], k = 3</math><br/> visuospatial skills** <math>g^+ = 0.02, p = 0.01, 95\% \text{ CI } [0.15 \text{ to } 0.29], k = 8</math><br/> executive function <math>g^+ = 0.09, p = 0.096, 95\% \text{ CI } [-0.02 \text{ to } 0.19], k = 29</math><br/> attention <math>g^+ = 0.024, p = 0.06, 95\% \text{ CI } [-0.01 \text{ to } 0.50], k = 11</math></p> <p><input checked="" type="checkbox"/> sign. <input type="checkbox"/> n.s.<br/> <input type="checkbox"/> sign. <input checked="" type="checkbox"/> n.s.<br/> <input checked="" type="checkbox"/> sign. <input type="checkbox"/> n.s.<br/> <input checked="" type="checkbox"/> sign. <input type="checkbox"/> n.s.<br/> <input checked="" type="checkbox"/> sign. <input type="checkbox"/> n.s.<br/> <input type="checkbox"/> sign. <input checked="" type="checkbox"/> n.s.<br/> <input checked="" type="checkbox"/> sign. <input type="checkbox"/> n.s.<br/> <input checked="" type="checkbox"/> sign. <input type="checkbox"/> n.s.</p> <p><input type="checkbox"/> <b>Brain / Neurochemicals / HRV</b></p> <p>NR</p> <p><input type="checkbox"/> <b>Physical Outcomes, Mobility, and Activities of Daily Living</b></p> <p>NR</p> <p><input type="checkbox"/> <b>Psychosocial Outcomes</b></p> <p>NR</p> |
| <p>Karbach et al.<br/>2014 [18]</p> | <p><b>POPULATION:</b><br/> <input checked="" type="checkbox"/> healthy older adults<br/> <input type="checkbox"/> older adults with mNCD<br/> <input type="checkbox"/> older adults with Dementia</p> <p><b>INTERVENTION:</b><br/> cognitive training interventions</p> <p><b>COMPARISON:</b><br/> mixed (passive or active without statistically difference between the pooled estimate between these two control groups)</p>                                | <p><input checked="" type="checkbox"/> <b>Cognition</b></p> <p>target measure (pooled)** <math>\Delta\text{SMD}_{\text{exp}}^+ = 0.91, p &lt; 0.001, 95\% \text{ CI } [0.83 \text{ to } 1.00], k = 28</math><br/> near transfer (pooled)** <math>\Delta\text{SMD}_{\text{exp}}^+ = 0.68, p &lt; 0.001, 95\% \text{ CI } [0.56 \text{ to } 0.79], k = 9</math><br/> far transfer (pooled)** <math>\Delta\text{SMD}_{\text{exp}}^+ = 0.37, p &lt; 0.001, 95\% \text{ CI } [0.24 \text{ to } 0.49], k = 4</math></p> <p><input checked="" type="checkbox"/> sign. <input type="checkbox"/> n.s.<br/> <input checked="" type="checkbox"/> sign. <input type="checkbox"/> n.s.<br/> <input type="checkbox"/> sign. <input checked="" type="checkbox"/> n.s.</p> <p><input type="checkbox"/> <b>Brain / Neurochemicals / HRV</b></p> <p>NR</p> <p><input type="checkbox"/> <b>Physical Outcomes, Mobility, and Activities of Daily Living</b></p> <p>NR</p> <p><input type="checkbox"/> <b>Psychosocial Outcomes</b></p> <p>NR</p>                                                                                                                                                                                                                                                                                                                                                                                                                                                                                                                                                                                                                                                                                                                                                                                                                                           |

Table S2: Summary of meta-analytic results for physical training interventions

color-coding: black = significant effect, grey = no significant effect

\* = significant at  $p \leq 0.05$ , \*\* = significant at  $p \leq 0.01$ 

Abbreviations: ADAS-cog = Alzheimer Disease Assessment Scale-Cognitive Subscale, ADL = Activities of daily living, BDNF = brain derived neurotrophic factor, CI = confidence interval, DSF = digit span forward, DSB = digit span backward, DSF-B =  $\Delta$  digit span forward – digit span backward, g = Hedge's g, GRADE = Grading of Recommendations Assessment, Development and Evaluation, HF-HRV = high frequency heart rate variability, HOA = healthy older adults; mNCD = mild neurocognitive disorder, MD = mean difference (absolut), MMSE = Mini-Mental State Examination, MoCA = Montreal Cognitive Assessment, k = number of studies; n = number of participants; NR = not reported, RAVL = Rey Auditory Verbal Learning Task, RMSSD = root mean square of successive RR interval differences, ST-Ptot = short-term total frequency power, ST-SDNN = short-term Standard Deviation of RR-Intervals SMD = standardized mean difference, ST-A = Stroop test A, ST-B = Stroop test B, TMT-A = Trail Making Test Part 1, TMT-B = Trail Making Test Part B, 24 h-SDNN = mean Standard Deviation of RR-Intervals over a time period of 24 h, 24 h-Ptot = mean total frequency power over a time period of 24 h

| Reference                    | Study Characteristics                                                                                                                                                                                                                                                                                                                                                                                                                                                                                                                                                                                                                                            | Outcomes                                                                                    |                                                                                |                                                                         |
|------------------------------|------------------------------------------------------------------------------------------------------------------------------------------------------------------------------------------------------------------------------------------------------------------------------------------------------------------------------------------------------------------------------------------------------------------------------------------------------------------------------------------------------------------------------------------------------------------------------------------------------------------------------------------------------------------|---------------------------------------------------------------------------------------------|--------------------------------------------------------------------------------|-------------------------------------------------------------------------|
|                              |                                                                                                                                                                                                                                                                                                                                                                                                                                                                                                                                                                                                                                                                  | Type                                                                                        | Statistics                                                                     | Heterogeneity GRADE                                                     |
| Biazus-Sehn et al. 2020 [19] | <b>POPULATION:</b><br><input type="checkbox"/> healthy older adults<br><input checked="" type="checkbox"/> older adults with mNCD<br><input type="checkbox"/> older adults with Dementia<br><br><b>INTERVENTION:</b><br><input checked="" type="checkbox"/> aerobic training<br><input checked="" type="checkbox"/> resistance training<br><input type="checkbox"/> balance training<br><input checked="" type="checkbox"/> multicomponent physical training<br><input type="checkbox"/> mixed physical training<br><br><b>COMPARISON:</b><br>mixed (i.e. no treatment; balance, tone or stretching programs; or social and/or mental activities)                | <input checked="" type="checkbox"/> <b>Cognition</b>                                        |                                                                                |                                                                         |
|                              |                                                                                                                                                                                                                                                                                                                                                                                                                                                                                                                                                                                                                                                                  | pooled estimates                                                                            |                                                                                |                                                                         |
|                              |                                                                                                                                                                                                                                                                                                                                                                                                                                                                                                                                                                                                                                                                  | global cognition**                                                                          | SMD <sup>+</sup> = 0.35, p < 0.001, 95 % CI [0.17 to 0.43], k = 18, n = 1,472  | <input type="checkbox"/> sign. <input checked="" type="checkbox"/> n.s. |
|                              |                                                                                                                                                                                                                                                                                                                                                                                                                                                                                                                                                                                                                                                                  | executive function*                                                                         | SMD <sup>+</sup> = 0.21, p = 0.026, 95 % CI [0.03 to 0.40], k = 19, n = 1,072  | <input type="checkbox"/> sign. <input checked="" type="checkbox"/> n.s. |
|                              |                                                                                                                                                                                                                                                                                                                                                                                                                                                                                                                                                                                                                                                                  | delayed recall*                                                                             | SMD <sup>+</sup> = 0.18, p = 0.047, 95 % CI [0.00 to 0.36], k = 17, n = 1,569  | <input type="checkbox"/> sign. <input checked="" type="checkbox"/> n.s. |
|                              |                                                                                                                                                                                                                                                                                                                                                                                                                                                                                                                                                                                                                                                                  | verbal fluency                                                                              | SMD <sup>+</sup> = 0.27, p = 0.069, 95 % CI [-0.02 to 0.56], k = 11, n = 1,115 | NR                                                                      |
|                              |                                                                                                                                                                                                                                                                                                                                                                                                                                                                                                                                                                                                                                                                  | attention                                                                                   | SMD <sup>+</sup> = 0.17, p = 0.073, 95 % CI [-0.02 to 0.36], k = 4, n = 467    | NR                                                                      |
|                              |                                                                                                                                                                                                                                                                                                                                                                                                                                                                                                                                                                                                                                                                  | immediate recall                                                                            | SMD <sup>+</sup> = 0.09, p = 0.31, 95 % CI [-0.09 to 0.26], k = 9, n = 679     | NR                                                                      |
|                              |                                                                                                                                                                                                                                                                                                                                                                                                                                                                                                                                                                                                                                                                  | cognitive speed                                                                             | SMD <sup>+</sup> = 0.02, p = 0.79, 95 % CI [-0.15 to 0.20], k = 11, n = 642    | NR                                                                      |
|                              |                                                                                                                                                                                                                                                                                                                                                                                                                                                                                                                                                                                                                                                                  | working memory                                                                              | SMD <sup>+</sup> = -0.01, p = 0.939, 95 % CI [-0.03 to -0.30], k = 15, n = 849 | NR                                                                      |
|                              |                                                                                                                                                                                                                                                                                                                                                                                                                                                                                                                                                                                                                                                                  | <b>aerobic training only</b>                                                                |                                                                                |                                                                         |
|                              |                                                                                                                                                                                                                                                                                                                                                                                                                                                                                                                                                                                                                                                                  | global cognition                                                                            | SMD <sup>+</sup> = 0.19, p = 0.364, 95 % CI [-0.22 to 0.59]                    | NR                                                                      |
|                              |                                                                                                                                                                                                                                                                                                                                                                                                                                                                                                                                                                                                                                                                  | executive function                                                                          | SMD <sup>+</sup> = 0.13, p = 0.407, 95 % CI [-0.18 to 0.44]                    | NR                                                                      |
|                              |                                                                                                                                                                                                                                                                                                                                                                                                                                                                                                                                                                                                                                                                  | delayed recall                                                                              | SMD <sup>+</sup> = 0.07, p = 0.596, 95 % CI [-0.19 to 0.34]                    | NR                                                                      |
|                              |                                                                                                                                                                                                                                                                                                                                                                                                                                                                                                                                                                                                                                                                  | <b>resistance training only</b>                                                             |                                                                                |                                                                         |
|                              |                                                                                                                                                                                                                                                                                                                                                                                                                                                                                                                                                                                                                                                                  | global cognition                                                                            | SMD <sup>+</sup> = 0.19, p = 0.488, 95 % CI [-0.35 to 0.74]                    | NR                                                                      |
|                              |                                                                                                                                                                                                                                                                                                                                                                                                                                                                                                                                                                                                                                                                  | executive function                                                                          | SMD <sup>+</sup> = 0.14, p = 0.499, 95 % CI [-0.26 to 0.53]                    | NR                                                                      |
|                              |                                                                                                                                                                                                                                                                                                                                                                                                                                                                                                                                                                                                                                                                  | delayed recall                                                                              | SMD <sup>+</sup> = -0.04, p = 0.856, 95 % CI [-0.44 to 0.37]                   | NR                                                                      |
|                              |                                                                                                                                                                                                                                                                                                                                                                                                                                                                                                                                                                                                                                                                  | <b>multicomp. training only</b>                                                             |                                                                                |                                                                         |
|                              |                                                                                                                                                                                                                                                                                                                                                                                                                                                                                                                                                                                                                                                                  | global cognition                                                                            | SMD <sup>+</sup> = 0.38, p = 0.066, 95 % CI [-0.03 to 0.79]                    | NR                                                                      |
|                              |                                                                                                                                                                                                                                                                                                                                                                                                                                                                                                                                                                                                                                                                  | executive function                                                                          | SMD <sup>+</sup> = 0.04, p = 0.928, 95 % CI [-0.81 to 0.90]                    | NR                                                                      |
|                              |                                                                                                                                                                                                                                                                                                                                                                                                                                                                                                                                                                                                                                                                  | delayed recall                                                                              | SMD <sup>+</sup> = 0.01, p = 0.973, 95 % CI [-0.38 to 0.39]                    | NR                                                                      |
|                              |                                                                                                                                                                                                                                                                                                                                                                                                                                                                                                                                                                                                                                                                  | <input type="checkbox"/> <b>Brain / Neurochemicals / HRV</b>                                |                                                                                |                                                                         |
|                              |                                                                                                                                                                                                                                                                                                                                                                                                                                                                                                                                                                                                                                                                  | NR                                                                                          |                                                                                |                                                                         |
|                              |                                                                                                                                                                                                                                                                                                                                                                                                                                                                                                                                                                                                                                                                  | <input type="checkbox"/> <b>Physical Outcomes, Mobility, and Activities of Daily Living</b> |                                                                                |                                                                         |
|                              |                                                                                                                                                                                                                                                                                                                                                                                                                                                                                                                                                                                                                                                                  | NR                                                                                          |                                                                                |                                                                         |
|                              |                                                                                                                                                                                                                                                                                                                                                                                                                                                                                                                                                                                                                                                                  | <input type="checkbox"/> <b>Psychosocial Outcomes</b>                                       |                                                                                |                                                                         |
|                              |                                                                                                                                                                                                                                                                                                                                                                                                                                                                                                                                                                                                                                                                  | NR                                                                                          |                                                                                |                                                                         |
| Chen et al. 2020 [20]        | <b>POPULATION:</b><br><input checked="" type="checkbox"/> healthy older adults<br><input checked="" type="checkbox"/> older adults with mNCD<br><input type="checkbox"/> older adults with Dementia<br><br><b>INTERVENTION:</b><br><input type="checkbox"/> aerobic training<br><input type="checkbox"/> resistance training<br><input type="checkbox"/> balance training<br><input type="checkbox"/> multicomponent physical training<br><input checked="" type="checkbox"/> mixed physical training<br><br><b>COMPARISON:</b><br>mixed (no contact, no treatment, waiting list, sham exercise, and alternative active treatments for the comparison condition) | <input checked="" type="checkbox"/> <b>Cognition</b>                                        |                                                                                |                                                                         |
|                              |                                                                                                                                                                                                                                                                                                                                                                                                                                                                                                                                                                                                                                                                  | pooled older adults:                                                                        |                                                                                |                                                                         |
|                              |                                                                                                                                                                                                                                                                                                                                                                                                                                                                                                                                                                                                                                                                  | shifting*                                                                                   | g <sup>+</sup> = 0.27, p < 0.05, 95 % CI [0.19 to 0.36], k = 34                | NR                                                                      |
|                              |                                                                                                                                                                                                                                                                                                                                                                                                                                                                                                                                                                                                                                                                  | overall effect (resistance)*                                                                | g <sup>+</sup> = 0.22, p < 0.05, 95 % CI [0.10 to 0.33], k = 20                | NR                                                                      |
|                              |                                                                                                                                                                                                                                                                                                                                                                                                                                                                                                                                                                                                                                                                  | overall (executive funct.)*                                                                 | g <sup>+</sup> = 0.21, p < 0.05, 95 % CI [0.17 to 0.26], k = 107               | <input checked="" type="checkbox"/> sign. <input type="checkbox"/> n.s. |
|                              |                                                                                                                                                                                                                                                                                                                                                                                                                                                                                                                                                                                                                                                                  | working memory*                                                                             | g <sup>+</sup> = 0.19, p < 0.05, 95 % CI [0.12 to 0.26], k = 42                | NR                                                                      |
|                              |                                                                                                                                                                                                                                                                                                                                                                                                                                                                                                                                                                                                                                                                  | inhibition*                                                                                 | g <sup>+</sup> = 0.14, p < 0.05, 95 % CI [0.04 to 0.24], k = 27                | NR                                                                      |
|                              |                                                                                                                                                                                                                                                                                                                                                                                                                                                                                                                                                                                                                                                                  | overall effect (aerobic)*                                                                   | g <sup>+</sup> = 0.14, p < 0.05, 95 % CI [0.06 to 0.33], k = 45                | NR                                                                      |
|                              |                                                                                                                                                                                                                                                                                                                                                                                                                                                                                                                                                                                                                                                                  | overall effect (combined)*                                                                  | g <sup>+</sup> = 0.10, p < 0.05, 95 % CI [0.00 to 0.19], k = 18                | NR                                                                      |
|                              |                                                                                                                                                                                                                                                                                                                                                                                                                                                                                                                                                                                                                                                                  | HOA:                                                                                        |                                                                                |                                                                         |
|                              |                                                                                                                                                                                                                                                                                                                                                                                                                                                                                                                                                                                                                                                                  | pooled effect (HOA)*                                                                        | g <sup>+</sup> = 0.26, p < 0.05, 95 % CI [0.20 to 0.32], k = 85                | NR                                                                      |
|                              |                                                                                                                                                                                                                                                                                                                                                                                                                                                                                                                                                                                                                                                                  | mNCD:                                                                                       |                                                                                |                                                                         |
|                              |                                                                                                                                                                                                                                                                                                                                                                                                                                                                                                                                                                                                                                                                  | pooled effect (mNCD)*                                                                       | g <sup>+</sup> = 0.08, p < 0.05, 95 % CI [0.00 to 0.17], k = 22                | NR                                                                      |
|                              |                                                                                                                                                                                                                                                                                                                                                                                                                                                                                                                                                                                                                                                                  | <input type="checkbox"/> <b>Brain / Neurochemicals / HRV</b>                                |                                                                                |                                                                         |
|                              |                                                                                                                                                                                                                                                                                                                                                                                                                                                                                                                                                                                                                                                                  | <input type="checkbox"/> <b>Physical Outcomes, Mobility, and Activities of Daily Living</b> |                                                                                |                                                                         |

|                       |                                                                                                                                                                                                                                                                                                                                                                                                                                                                                                                                                                                                                                                                |                                                                                                                                                                                                                                                                                                                                                                                                                                                                                                                                                                                                                                                                                                                                                                                                                                                                                                                                                                                                                                                                                                                                                                                                                                                                                                                                                                                                                                                                                                                                                                                                                                                                                                                                                                                                                                                                                                                                                                                                                                                                                                                                                                                                                                                                                                                                                                                                                                                                                                                                                  |
|-----------------------|----------------------------------------------------------------------------------------------------------------------------------------------------------------------------------------------------------------------------------------------------------------------------------------------------------------------------------------------------------------------------------------------------------------------------------------------------------------------------------------------------------------------------------------------------------------------------------------------------------------------------------------------------------------|--------------------------------------------------------------------------------------------------------------------------------------------------------------------------------------------------------------------------------------------------------------------------------------------------------------------------------------------------------------------------------------------------------------------------------------------------------------------------------------------------------------------------------------------------------------------------------------------------------------------------------------------------------------------------------------------------------------------------------------------------------------------------------------------------------------------------------------------------------------------------------------------------------------------------------------------------------------------------------------------------------------------------------------------------------------------------------------------------------------------------------------------------------------------------------------------------------------------------------------------------------------------------------------------------------------------------------------------------------------------------------------------------------------------------------------------------------------------------------------------------------------------------------------------------------------------------------------------------------------------------------------------------------------------------------------------------------------------------------------------------------------------------------------------------------------------------------------------------------------------------------------------------------------------------------------------------------------------------------------------------------------------------------------------------------------------------------------------------------------------------------------------------------------------------------------------------------------------------------------------------------------------------------------------------------------------------------------------------------------------------------------------------------------------------------------------------------------------------------------------------------------------------------------------------|
|                       |                                                                                                                                                                                                                                                                                                                                                                                                                                                                                                                                                                                                                                                                | <input type="checkbox"/> Psychosocial Outcomes                                                                                                                                                                                                                                                                                                                                                                                                                                                                                                                                                                                                                                                                                                                                                                                                                                                                                                                                                                                                                                                                                                                                                                                                                                                                                                                                                                                                                                                                                                                                                                                                                                                                                                                                                                                                                                                                                                                                                                                                                                                                                                                                                                                                                                                                                                                                                                                                                                                                                                   |
| Zhou et al. 2020 [21] | <p><b>POPULATION:</b></p> <p><input type="checkbox"/> healthy older adults<br/> <input checked="" type="checkbox"/> older adults with mNCD<br/> <input type="checkbox"/> older adults with Dementia</p> <p><b>INTERVENTION:</b></p> <p><input type="checkbox"/> aerobic training<br/> <input type="checkbox"/> resistance training<br/> <input type="checkbox"/> balance training<br/> <input type="checkbox"/> multicomponent physical training<br/> <input checked="" type="checkbox"/> mixed physical training</p> <p><b>COMPARISON:</b></p> <p>mixed (i.e. sham (such as stretching activities), placebo or no treatment or health education)</p>          | <p><input checked="" type="checkbox"/> <b>Cognition</b></p> <p>executive function** SMD<sup>+</sup> = 0.66, p = 0.008, 95 % CI [0.17 to 1.15], k = 5, n = 243 <input checked="" type="checkbox"/> sign. <input type="checkbox"/> n.s.<br/> <small>(DSF, DSB, DSF-B_ST-A, ST-B)</small></p> <p>verbal fluency** SMD<sup>+</sup> = 0.55, p = 0.001, 95 % CI [0.22 to 0.89], k = 2, n = 72 <input type="checkbox"/> sign. <input checked="" type="checkbox"/> n.s.<br/> gen. cognition** (ADAS-cog) SMD<sup>+</sup> = - 0.45, p = 0.02, 95 % CI [- 0.82 to - 0.08], k = 2, n = 171 <input type="checkbox"/> sign. <input checked="" type="checkbox"/> n.s.<br/> visuo-spatial skills* SMD<sup>+</sup> = 0.38, p = 0.03, 95 % CI [0.03 to 0.72], k = 2, n = 132 <input type="checkbox"/> sign. <input checked="" type="checkbox"/> n.s.<br/> memory** SMD<sup>+</sup> = 0.37, p = 0.001, 95 % CI [0.15 to 0.60], k = 4, n = 295 <input type="checkbox"/> sign. <input checked="" type="checkbox"/> n.s.<br/> gen. cog. ** (MMSE, MoCA) SMD<sup>+</sup> = 0.32, p = 0.005, 95 % CI [0.10 to 0.54], k = 5, n = 355 <input type="checkbox"/> sign. <input checked="" type="checkbox"/> n.s.<br/> executive funct. (TMT B-A) SMD<sup>+</sup> = 0.25, p = 0.45, 95 % CI [- 0.88 to 0.39], k = 3, n = 203 <input checked="" type="checkbox"/> sign. <input type="checkbox"/> n.s.</p> <p><input type="checkbox"/> <b>Brain / Neurochemicals / HRV</b></p> <p>NR</p> <p><input type="checkbox"/> <b>Physical Outcomes, Mobility, and Activities of Daily Living</b></p> <p>NR</p> <p><input type="checkbox"/> <b>Psychosocial Outcomes</b></p> <p>NR</p>                                                                                                                                                                                                                                                                                                                                                                                                                                                                                                                                                                                                                                                                                                                                                                                                                                                                                                    |
| Law et al. 2020 [22]  | <p><b>POPULATION:</b></p> <p><input type="checkbox"/> healthy older adults<br/> <input checked="" type="checkbox"/> older adults with mNCD<br/> <input type="checkbox"/> older adults with Dementia</p> <p><b>INTERVENTION:</b></p> <p><input checked="" type="checkbox"/> aerobic training<br/> <input type="checkbox"/> resistance training<br/> <input type="checkbox"/> balance training<br/> <input type="checkbox"/> multicomponent physical training<br/> <input checked="" type="checkbox"/> mixed physical training</p> <p><b>COMPARISON:</b></p> <p>mixed (i.e. no intervention or training plus other intervention vs. other intervention only)</p> | <p><input checked="" type="checkbox"/> <b>Cognition</b></p> <p>pooled estimates:</p> <p>global cognition** SMD<sup>+</sup> = 0.42, p &lt; 0.001, 95 % CI [0.25 to 0.59], k = 26, n = 2,079 <input checked="" type="checkbox"/> sign. <input type="checkbox"/> n.s. low<br/> working memory* SMD<sup>+</sup> = 0.26, p = 0.02, 95 % CI [0.03 to 0.49], k = 8, n = 646 <input checked="" type="checkbox"/> sign. <input type="checkbox"/> n.s. low<br/> recognition SMD<sup>+</sup> = 0.31, p = 0.28, 95 % CI [-0.25 to 0.88], k = 6, n = 291 <input type="checkbox"/> sign. <input checked="" type="checkbox"/> n.s. low<br/> delayed memory SMD<sup>+</sup> = 0.15, p = 0.12, 95 % CI [-0.04 to 0.33], k = 11, n = 1,294 <input checked="" type="checkbox"/> sign. <input type="checkbox"/> n.s. low<br/> language SMD<sup>+</sup> = 0.15, p = 0.11, 95 % CI [-0.03 to 0.34], k = 15, n = 1,593 <input checked="" type="checkbox"/> sign. <input type="checkbox"/> n.s. very low<br/> attention SMD<sup>+</sup> = 0.04, p = 0.52, 95 % CI [-0.07 to 0.15], k = 15, n = 1,294 <input type="checkbox"/> sign. <input checked="" type="checkbox"/> n.s. moderate<br/> cogn. flexibility SMD<sup>+</sup> = 0.03, p = 0.74, 95 % CI [-0.14 to 0.20], k = 8, n = 544 <input type="checkbox"/> sign. <input checked="" type="checkbox"/> n.s. moderate</p> <p>aerobic training only:</p> <p>global cognition** SMD<sup>+</sup> = 0.45, 95 % CI [0.15 to 0.76], k = 11, n = 704 <input type="checkbox"/> sign. <input checked="" type="checkbox"/> n.s. moderate<br/> attention SMD<sup>+</sup> = 0.12, 95 % CI [-0.06 to 0.30], k = 6, n = 481 <input type="checkbox"/> sign. <input checked="" type="checkbox"/> n.s.<br/> cogn. flexibility SMD<sup>+</sup> = 0.01, 95 % CI [-0.16 to 0.19], k = 6, n = 522 <input type="checkbox"/> sign. <input checked="" type="checkbox"/> n.s.</p> <p>multicomp. training only:</p> <p>global cognition** SMD<sup>+</sup> = 0.43, 95 % CI [0.13 to 0.73], k = 9, n = 831 <input checked="" type="checkbox"/> sign. <input type="checkbox"/> n.s.</p> <p><input type="checkbox"/> <b>Brain / Neurochemicals / HRV</b></p> <p>NR</p> <p><input type="checkbox"/> <b>Physical Outcomes, Mobility, and Activities of Daily Living</b></p> <p>NR</p> <p><input checked="" type="checkbox"/> <b>Psychosocial Outcomes</b></p> <p>behavioral problems** SMD<sup>+</sup> = 0.35, p = 0.01, 95 % CI [0.07 to 0.64], k = 9, n = 1,172 <input type="checkbox"/> sign. <input checked="" type="checkbox"/> n.s. moderate</p> |
| Jia et al. 2019 [23]  | <p><b>POPULATION:</b></p> <p><input type="checkbox"/> healthy older adults<br/> <input checked="" type="checkbox"/> older adults with mNCD<br/> <input type="checkbox"/> older adults with Dementia</p> <p><b>INTERVENTION:</b></p> <p><input checked="" type="checkbox"/> aerobic training<br/> <input type="checkbox"/> resistance training<br/> <input type="checkbox"/> balance training<br/> <input type="checkbox"/> multicomponent physical training<br/> <input type="checkbox"/> mixed physical training</p> <p><b>COMPARISON:</b></p> <p>non-diet, non-training control group</p>                                                                    | <p><input checked="" type="checkbox"/> <b>Cognition</b></p> <p>global cognition (MMSE)** SMD<sup>+</sup> = 1.12, p &lt; 0.001, 95 % CI [0.66 to 1.59], k = 13, n = 673 <input checked="" type="checkbox"/> sign. <input type="checkbox"/> n.s.</p> <p><input type="checkbox"/> <b>Brain / Neurochemicals / HRV</b></p> <p>NR</p> <p><input type="checkbox"/> <b>Physical Outcomes, Mobility, and Activities of Daily Living</b></p> <p>NR</p> <p><input type="checkbox"/> <b>Psychosocial Outcomes</b></p> <p>NR</p>                                                                                                                                                                                                                                                                                                                                                                                                                                                                                                                                                                                                                                                                                                                                                                                                                                                                                                                                                                                                                                                                                                                                                                                                                                                                                                                                                                                                                                                                                                                                                                                                                                                                                                                                                                                                                                                                                                                                                                                                                             |
|                       |                                                                                                                                                                                                                                                                                                                                                                                                                                                                                                                                                                                                                                                                |                                                                                                                                                                                                                                                                                                                                                                                                                                                                                                                                                                                                                                                                                                                                                                                                                                                                                                                                                                                                                                                                                                                                                                                                                                                                                                                                                                                                                                                                                                                                                                                                                                                                                                                                                                                                                                                                                                                                                                                                                                                                                                                                                                                                                                                                                                                                                                                                                                                                                                                                                  |

|                                |                                                                                                                                                                                                                                                                                                                                                                                                                                                                                                                                                                                                                                                                                              |                                                                                                                                                                                                                                                                                                                                                                                                                                                                                                                                                                                                                                                                                                                                                                                                                                                                                                                                                                                                                                                                                                                                                                                                                                                                                                                                                                                                                                                                                                                                                                                                                                                                                                                                                                                                                                                                                                                                                                                                                                                                                                                                                                                                                                                                                                                                                                                                                                                                                                                   |
|--------------------------------|----------------------------------------------------------------------------------------------------------------------------------------------------------------------------------------------------------------------------------------------------------------------------------------------------------------------------------------------------------------------------------------------------------------------------------------------------------------------------------------------------------------------------------------------------------------------------------------------------------------------------------------------------------------------------------------------|-------------------------------------------------------------------------------------------------------------------------------------------------------------------------------------------------------------------------------------------------------------------------------------------------------------------------------------------------------------------------------------------------------------------------------------------------------------------------------------------------------------------------------------------------------------------------------------------------------------------------------------------------------------------------------------------------------------------------------------------------------------------------------------------------------------------------------------------------------------------------------------------------------------------------------------------------------------------------------------------------------------------------------------------------------------------------------------------------------------------------------------------------------------------------------------------------------------------------------------------------------------------------------------------------------------------------------------------------------------------------------------------------------------------------------------------------------------------------------------------------------------------------------------------------------------------------------------------------------------------------------------------------------------------------------------------------------------------------------------------------------------------------------------------------------------------------------------------------------------------------------------------------------------------------------------------------------------------------------------------------------------------------------------------------------------------------------------------------------------------------------------------------------------------------------------------------------------------------------------------------------------------------------------------------------------------------------------------------------------------------------------------------------------------------------------------------------------------------------------------------------------------|
| Marinus et al.<br>2019 [24]    | <p><b>POPULATION:</b></p> <p><input checked="" type="checkbox"/> healthy older adults<br/><input type="checkbox"/> older adults with mNCD<br/><input type="checkbox"/> older adults with Dementia</p> <p><b>INTERVENTION:</b></p> <p><input checked="" type="checkbox"/> aerobic training<br/><input checked="" type="checkbox"/> resistance training<br/><input type="checkbox"/> balance training<br/><input checked="" type="checkbox"/> multicomponent physical training<br/><input type="checkbox"/> mixed physical training</p> <p><b>COMPARISON:</b><br/>mixed (i.e. comparison to another training intervention, control intervention (no training) or pre-intervention values))</p> | <p><input type="checkbox"/> Cognition</p> <p>NR</p> <p><input checked="" type="checkbox"/> Brain / Neurochemicals / HRV</p> <p>[BDNF]<sub>blood (pooled)</sub>** <math>g^+ = 0.53, p &lt; 0.001, 95\% \text{ CI } [0.31 \text{ to } 0.75], k = 11, n = 464</math> <input checked="" type="checkbox"/> sign. <input type="checkbox"/> n.s.<br/> <math>\Delta[\text{BDNF}]_{\text{blood (multicomp.)}}^{**}</math> <math>g^- = -0.43, p &lt; 0.001, 95\% \text{ CI } [-0.71 \text{ to } -0.15], k = 4, n = 103</math> <input type="checkbox"/> sign. <input checked="" type="checkbox"/> n.s.<br/> <math>\Delta[\text{BDNF}]_{\text{blood (resistance)}}^{**}</math> <math>g^- = -0.22, p = 0.003, 95\% \text{ CI } [-0.37 \text{ to } -0.07], k = 10, n = 361</math> <input checked="" type="checkbox"/> sign. <input type="checkbox"/> n.s.<br/> <math>\Delta[\text{BDNF}]_{\text{blood (pooled)}}^{**}</math> <math>g^- = -0.20, p &lt; 0.001, 95\% \text{ CI } [-0.30 \text{ to } -0.09], k = 20, n = 730</math> <input checked="" type="checkbox"/> sign. <input type="checkbox"/> n.s.<br/> <math>\Delta[\text{BDNF}]_{\text{blood (aerobic)}}</math> <math>g^- = -0.07, p = 0.41, 95\% \text{ CI } [-0.24 \text{ to } 0.10], k = 5, n = 266</math> <input checked="" type="checkbox"/> sign. <input type="checkbox"/> n.s.</p> <p><input type="checkbox"/> Physical Outcomes, Mobility, and Activities of Daily Living</p> <p>NR</p> <p><input type="checkbox"/> Psychosocial Outcomes</p> <p>NR</p>                                                                                                                                                                                                                                                                                                                                                                                                                                                                                                                                                                                                                                                                                                                                                                                                                                                                                                                                                                                                         |
| Raffin et al.<br>2019 [25]     | <p><b>POPULATION:</b></p> <p><input checked="" type="checkbox"/> healthy older adults<br/><input type="checkbox"/> older adults with mNCD<br/><input type="checkbox"/> older adults with Dementia</p> <p><b>INTERVENTION:</b></p> <p><input checked="" type="checkbox"/> aerobic training<br/><input type="checkbox"/> resistance training<br/><input type="checkbox"/> balance training<br/><input checked="" type="checkbox"/> multicomponent physical training<br/><input type="checkbox"/> mixed physical training</p> <p><b>COMPARISON:</b><br/>NR</p>                                                                                                                                  | <p><input type="checkbox"/> Cognition</p> <p>NR</p> <p><input checked="" type="checkbox"/> Brain / Neurochemicals / HRV / HRV</p> <p>overall study analysis:<br/> 24 h-SDNN** <math>g^+ = 0.442, p = 0.004, 95\% \text{ CI } [0.144 \text{ to } 0.740], k = 3, n = 52</math> <input type="checkbox"/> sign. <input checked="" type="checkbox"/> n.s.<br/> ST-SDNN** <math>g^+ = 0.366, p &lt; 0.001, 95\% \text{ CI } [0.366 \text{ to } 0.185], k = 5, n = 66</math> <input type="checkbox"/> sign. <input checked="" type="checkbox"/> n.s.<br/> 24 h-P<sub>tot</sub> <math>g^+ = 1.334, p = 0.060, 95\% \text{ CI } [-0.057 \text{ to } 2.724], k = 2, n = 25</math> <input checked="" type="checkbox"/> sign. <input type="checkbox"/> n.s.<br/> HF-HRV <math>g^+ = 0.089, p = 0.260, 95\% \text{ CI } [-0.066 \text{ to } 0.243], k = 12, n = 200</math> <input type="checkbox"/> sign. <input checked="" type="checkbox"/> n.s.<br/> RMSSD <math>g^+ = 0.078, p = 0.581, 95\% \text{ CI } [-0.201 \text{ to } 0.358], k = 6, n = 114</math> <input type="checkbox"/> sign. <input checked="" type="checkbox"/> n.s.<br/> ST-P<sub>tot</sub> <math>g^+ = -0.055, p = 0.774, 95\% \text{ CI } [-0.434 \text{ to } 0.323], k = 4, n = 73</math> <input type="checkbox"/> sign. <input checked="" type="checkbox"/> n.s.</p> <p>controlled study analysis:<br/> 24 h-SDNN** <math>g^+ = 0.721, p = 0.008, 95\% \text{ CI } [0.184 \text{ to } 1.257], k = 3, n = 106</math> <input type="checkbox"/> sign. <input checked="" type="checkbox"/> n.s.<br/> 24 h-P<sub>tot</sub>** <math>g^+ = 0.731, p = 0.008, 95\% \text{ CI } [0.195 \text{ to } 1.267], k = 2, n = 55</math> <input type="checkbox"/> sign. <input checked="" type="checkbox"/> n.s.<br/> ST-SDNN <math>g^+ = 0.605, p = 0.075, 95\% \text{ CI } [-0.062 \text{ to } 1.271], k = 2, n = 63</math> <input type="checkbox"/> sign. <input checked="" type="checkbox"/> n.s.<br/> HF-HRV <math>g^+ = 0.236, p = 0.086, 95\% \text{ CI } [-0.033 \text{ to } 0.506], k = 6, n = 205</math> <input type="checkbox"/> sign. <input checked="" type="checkbox"/> n.s.<br/> RMSSD <math>g^+ = 0.299, p = 0.105, 95\% \text{ CI } [-0.062 \text{ to } 0.659], k = 4, n = 116</math> <input type="checkbox"/> sign. <input checked="" type="checkbox"/> n.s.</p> <p><input type="checkbox"/> Physical Outcomes, Mobility, and Activities of Daily Living</p> <p>NR</p> <p><input type="checkbox"/> Psychosocial Outcomes</p> <p>NR</p>                  |
| Sanders et al.<br>2019<br>[26] | <p><b>POPULATION:</b></p> <p><input checked="" type="checkbox"/> healthy older adults<br/><input checked="" type="checkbox"/> older adults with mNCD<br/><input type="checkbox"/> older adults with Dementia</p> <p><b>INTERVENTION:</b></p> <p><input checked="" type="checkbox"/> aerobic training<br/><input checked="" type="checkbox"/> resistance training<br/><input type="checkbox"/> balance training<br/><input checked="" type="checkbox"/> multicomponent physical training<br/><input checked="" type="checkbox"/> mixed physical training</p> <p><b>COMPARISON:</b><br/>contrasting activities (i.e. including non-physical activities or stretching and toning)</p>           | <p><input checked="" type="checkbox"/> Cognition</p> <p>HOA:<br/> execut. funct.(pooled)** <math>g^+ = 0.34, p &lt; 0.01, 95\% \text{ CI } [0.20 \text{ to } 0.47], k = 28, n = 1,430</math> <input type="checkbox"/> sign. <input checked="" type="checkbox"/> n.s.<br/> memory(pooled)** <math>g^+ = 0.31, p &lt; 0.01, 95\% \text{ CI } [0.10 \text{ to } 0.53], k = 11, n = 589</math> <input type="checkbox"/> sign. <input checked="" type="checkbox"/> n.s.<br/> overall estimate(pooled)** <math>g^+ = 0.26, p &lt; 0.01, 95\% \text{ CI } [0.15 \text{ to } 0.37], k = 23, n = 1,225</math> NR<br/> overall est.(resistance)** <math>g^+ = 0.27, p &lt; 0.01, 95\% \text{ CI } [0.09 \text{ to } 0.46]</math> NR<br/> overall est.(aerobic)** <math>g^+ = 0.22, p &lt; 0.01, 95\% \text{ CI } [0.03 \text{ to } 0.41]</math> NR<br/> overall est.(mult.comp) <math>g^+ = 0.30, p &gt; 0.05, 95\% \text{ CI } [-0.01 \text{ to } 0.60]</math> NR<br/> global cognition(pooled) <math>g^+ = 0.10, p &gt; 0.05, 95\% \text{ CI } [-0.04 \text{ to } 0.24], k = 5, n = 314</math> <input type="checkbox"/> sign. <input checked="" type="checkbox"/> n.s.</p> <p>mNCD:<br/> global cognition(pooled)** <math>g^+ = 0.47, p &lt; 0.01, 95\% \text{ CI } [0.19 \text{ to } 0.74], k = 11, n = 699</math> <input type="checkbox"/> sign. <input checked="" type="checkbox"/> n.s.<br/> overall est.(multicomp)** <math>g^+ = 0.36, p &lt; 0.01, 95\% \text{ CI } [0.04 \text{ to } 0.68]</math> NR<br/> execut. function(pooled)* <math>g^+ = 0.24, p &lt; 0.05, 95\% \text{ CI } [0.02 \text{ to } 0.47], k = 6, n = 358</math> <input type="checkbox"/> sign. <input checked="" type="checkbox"/> n.s.<br/> overall est.(pooled)* <math>g^+ = 0.22, p &lt; 0.05, 95\% \text{ CI } [0.05 \text{ to } 0.39], k = 13, n = 782</math> NR<br/> overall est.(aerobic) <math>g^+ = 0.22, p &gt; 0.05, 95\% \text{ CI } [-0.20 \text{ to } 0.64]</math> NR<br/> overall est.(aerobic) <math>g^+ = 0.22, p &gt; 0.05, 95\% \text{ CI } [-0.20 \text{ to } 0.64]</math> NR<br/> memory(pooled) <math>g^+ = 0.11, p &gt; 0.05, 95\% \text{ CI } [-0.07 \text{ to } 0.28], k = 6, n = 311</math> <input type="checkbox"/> sign. <input checked="" type="checkbox"/> n.s.</p> <p><input type="checkbox"/> Brain / Neurochemicals / HRV</p> <p>NR</p> <p><input type="checkbox"/> Physical Outcomes, Mobility, and Activities of Daily Living</p> <p>NR</p> <p><input type="checkbox"/> Psychosocial Outcomes</p> <p>NR</p> |



|                                     |                                                                                                                                                                                                                                                                                                                                                                                                                                                                                                                                                                                                                                                                                                                      |                                                                                                                                                                                                                                                                                                                                                                                                                                                                                                                                                                                                                                                                                                                                                                                                                                                                                                                                                                                                                                                                                                                                                                                                                                                                                                                                                                                                                                                                                                                                                                                                                                                                                                                                                                                                                                                                                                                                                                                                                                                                                                                                                                                                                                                                                                                                                                                                                                                  |                                 |                                                                     |                                                                                  |                                   |                                                                   |                                                                             |                                   |                                                                    |                                                                              |                              |                                                                       |                                                                              |                               |                                                                       |                                                                              |                                    |                                                                       |                                                                                  |                      |                                                                            |                                                                                  |                             |                                                                    |                                                                                  |                         |                                                                   |                                                                             |                      |                                                                   |    |                     |                                                                    |    |                           |                                                                   |    |     |  |  |                    |                                                                   |    |      |  |  |                    |                                                                    |    |
|-------------------------------------|----------------------------------------------------------------------------------------------------------------------------------------------------------------------------------------------------------------------------------------------------------------------------------------------------------------------------------------------------------------------------------------------------------------------------------------------------------------------------------------------------------------------------------------------------------------------------------------------------------------------------------------------------------------------------------------------------------------------|--------------------------------------------------------------------------------------------------------------------------------------------------------------------------------------------------------------------------------------------------------------------------------------------------------------------------------------------------------------------------------------------------------------------------------------------------------------------------------------------------------------------------------------------------------------------------------------------------------------------------------------------------------------------------------------------------------------------------------------------------------------------------------------------------------------------------------------------------------------------------------------------------------------------------------------------------------------------------------------------------------------------------------------------------------------------------------------------------------------------------------------------------------------------------------------------------------------------------------------------------------------------------------------------------------------------------------------------------------------------------------------------------------------------------------------------------------------------------------------------------------------------------------------------------------------------------------------------------------------------------------------------------------------------------------------------------------------------------------------------------------------------------------------------------------------------------------------------------------------------------------------------------------------------------------------------------------------------------------------------------------------------------------------------------------------------------------------------------------------------------------------------------------------------------------------------------------------------------------------------------------------------------------------------------------------------------------------------------------------------------------------------------------------------------------------------------|---------------------------------|---------------------------------------------------------------------|----------------------------------------------------------------------------------|-----------------------------------|-------------------------------------------------------------------|-----------------------------------------------------------------------------|-----------------------------------|--------------------------------------------------------------------|------------------------------------------------------------------------------|------------------------------|-----------------------------------------------------------------------|------------------------------------------------------------------------------|-------------------------------|-----------------------------------------------------------------------|------------------------------------------------------------------------------|------------------------------------|-----------------------------------------------------------------------|----------------------------------------------------------------------------------|----------------------|----------------------------------------------------------------------------|----------------------------------------------------------------------------------|-----------------------------|--------------------------------------------------------------------|----------------------------------------------------------------------------------|-------------------------|-------------------------------------------------------------------|-----------------------------------------------------------------------------|----------------------|-------------------------------------------------------------------|----|---------------------|--------------------------------------------------------------------|----|---------------------------|-------------------------------------------------------------------|----|-----|--|--|--------------------|-------------------------------------------------------------------|----|------|--|--|--------------------|--------------------------------------------------------------------|----|
| <p>Lam et al.<br/>2018 [29]</p>     | <p><b>POPULATION:</b><br/> <input type="checkbox"/> healthy older adults<br/> <input checked="" type="checkbox"/> older adults with mNCD<br/> <input type="checkbox"/> older adults with Dementia</p> <p><b>INTERVENTION:</b><br/> <input checked="" type="checkbox"/> aerobic training<br/> <input checked="" type="checkbox"/> resistance training<br/> <input checked="" type="checkbox"/> balance training<br/> <input checked="" type="checkbox"/> multicomponent physical training<br/> <input checked="" type="checkbox"/> mixed physical training</p> <p><b>COMPARISON:</b><br/> mixed (i.e. training versus no intervention/placebo or training plus other intervention versus other intervention only)</p> | <p><input type="checkbox"/> Cognition<br/>NR</p> <p><input type="checkbox"/> Brain / Neurochemicals / HRV<br/>NR</p> <p><input checked="" type="checkbox"/> Physical Outcomes, Mobility, and Activities of Daily Living</p> <table border="0"> <tr> <td>endurance (6-min walk test)*</td> <td>MD<sup>+</sup> = 50, p &lt; 0.05, 95 % CI [18 to 81], k = 7, n = 402</td> <td><input checked="" type="checkbox"/> sign. <input type="checkbox"/> n.s. moderate</td> </tr> <tr> <td>ADL (Barthel Index)*</td> <td>MD<sup>+</sup> = 10, p &lt; 0.05, 95 % CI [3 to 16], k = 4, n = 237</td> <td><input checked="" type="checkbox"/> sign. <input type="checkbox"/> n.s. low</td> </tr> <tr> <td>step length [cm]*</td> <td>MD<sup>+</sup> = 5, p &lt; 0.05, 95 % CI [2 to 8], k = 5, n = 296</td> <td><input type="checkbox"/> sign. <input checked="" type="checkbox"/> n.s. high</td> </tr> <tr> <td>balance (funct. reach test)*</td> <td>MD<sup>+</sup> = 3.9, p &lt; 0.05, 95 % CI [0.3 to 7.0], k = 6, n = 242</td> <td><input type="checkbox"/> sign. <input checked="" type="checkbox"/> n.s. high</td> </tr> <tr> <td>balance (Berg-balance-scale)*</td> <td>MD<sup>+</sup> = 3.6, p &lt; 0.05, 95 % CI [0.3 to 7.0], k = 6, n = 722</td> <td><input checked="" type="checkbox"/> sign. <input type="checkbox"/> n.s. high</td> </tr> <tr> <td>strength (30-second sit-to-stand)*</td> <td>MD<sup>+</sup> = 2.1, p &lt; 0.05, 95 % CI [0.3 to 3.9], k = 4, n = 278</td> <td><input checked="" type="checkbox"/> sign. <input type="checkbox"/> n.s. moderate</td> </tr> <tr> <td>walking speed [m/s]*</td> <td>MD<sup>+</sup> = 0.13, p &lt; 0.05, 95 % CI [0.03 to 0.24], k = 7, n = 568</td> <td><input checked="" type="checkbox"/> sign. <input type="checkbox"/> n.s. moderate</td> </tr> <tr> <td>mobility (Timed Up and Go)*</td> <td>MD<sup>-</sup> = -1, p &lt; 0.05, 95 % CI [-2 to 0], k = 11, n = 606</td> <td><input type="checkbox"/> sign. <input checked="" type="checkbox"/> n.s. moderate</td> </tr> <tr> <td>fall rate</td> <td>OR = 0.98, p &gt; 0.05, 95 % CI [0.49 to 1.95], k = 3, n = 191</td> <td><input type="checkbox"/> sign. <input checked="" type="checkbox"/> n.s. low</td> </tr> </table> <p><input type="checkbox"/> Psychosocial Outcomes<br/>NR</p>                                                                                                                                                     | endurance (6-min walk test)*    | MD <sup>+</sup> = 50, p < 0.05, 95 % CI [18 to 81], k = 7, n = 402  | <input checked="" type="checkbox"/> sign. <input type="checkbox"/> n.s. moderate | ADL (Barthel Index)*              | MD <sup>+</sup> = 10, p < 0.05, 95 % CI [3 to 16], k = 4, n = 237 | <input checked="" type="checkbox"/> sign. <input type="checkbox"/> n.s. low | step length [cm]*                 | MD <sup>+</sup> = 5, p < 0.05, 95 % CI [2 to 8], k = 5, n = 296    | <input type="checkbox"/> sign. <input checked="" type="checkbox"/> n.s. high | balance (funct. reach test)* | MD <sup>+</sup> = 3.9, p < 0.05, 95 % CI [0.3 to 7.0], k = 6, n = 242 | <input type="checkbox"/> sign. <input checked="" type="checkbox"/> n.s. high | balance (Berg-balance-scale)* | MD <sup>+</sup> = 3.6, p < 0.05, 95 % CI [0.3 to 7.0], k = 6, n = 722 | <input checked="" type="checkbox"/> sign. <input type="checkbox"/> n.s. high | strength (30-second sit-to-stand)* | MD <sup>+</sup> = 2.1, p < 0.05, 95 % CI [0.3 to 3.9], k = 4, n = 278 | <input checked="" type="checkbox"/> sign. <input type="checkbox"/> n.s. moderate | walking speed [m/s]* | MD <sup>+</sup> = 0.13, p < 0.05, 95 % CI [0.03 to 0.24], k = 7, n = 568   | <input checked="" type="checkbox"/> sign. <input type="checkbox"/> n.s. moderate | mobility (Timed Up and Go)* | MD <sup>-</sup> = -1, p < 0.05, 95 % CI [-2 to 0], k = 11, n = 606 | <input type="checkbox"/> sign. <input checked="" type="checkbox"/> n.s. moderate | fall rate               | OR = 0.98, p > 0.05, 95 % CI [0.49 to 1.95], k = 3, n = 191       | <input type="checkbox"/> sign. <input checked="" type="checkbox"/> n.s. low |                      |                                                                   |    |                     |                                                                    |    |                           |                                                                   |    |     |  |  |                    |                                                                   |    |      |  |  |                    |                                                                    |    |
| endurance (6-min walk test)*        | MD <sup>+</sup> = 50, p < 0.05, 95 % CI [18 to 81], k = 7, n = 402                                                                                                                                                                                                                                                                                                                                                                                                                                                                                                                                                                                                                                                   | <input checked="" type="checkbox"/> sign. <input type="checkbox"/> n.s. moderate                                                                                                                                                                                                                                                                                                                                                                                                                                                                                                                                                                                                                                                                                                                                                                                                                                                                                                                                                                                                                                                                                                                                                                                                                                                                                                                                                                                                                                                                                                                                                                                                                                                                                                                                                                                                                                                                                                                                                                                                                                                                                                                                                                                                                                                                                                                                                                 |                                 |                                                                     |                                                                                  |                                   |                                                                   |                                                                             |                                   |                                                                    |                                                                              |                              |                                                                       |                                                                              |                               |                                                                       |                                                                              |                                    |                                                                       |                                                                                  |                      |                                                                            |                                                                                  |                             |                                                                    |                                                                                  |                         |                                                                   |                                                                             |                      |                                                                   |    |                     |                                                                    |    |                           |                                                                   |    |     |  |  |                    |                                                                   |    |      |  |  |                    |                                                                    |    |
| ADL (Barthel Index)*                | MD <sup>+</sup> = 10, p < 0.05, 95 % CI [3 to 16], k = 4, n = 237                                                                                                                                                                                                                                                                                                                                                                                                                                                                                                                                                                                                                                                    | <input checked="" type="checkbox"/> sign. <input type="checkbox"/> n.s. low                                                                                                                                                                                                                                                                                                                                                                                                                                                                                                                                                                                                                                                                                                                                                                                                                                                                                                                                                                                                                                                                                                                                                                                                                                                                                                                                                                                                                                                                                                                                                                                                                                                                                                                                                                                                                                                                                                                                                                                                                                                                                                                                                                                                                                                                                                                                                                      |                                 |                                                                     |                                                                                  |                                   |                                                                   |                                                                             |                                   |                                                                    |                                                                              |                              |                                                                       |                                                                              |                               |                                                                       |                                                                              |                                    |                                                                       |                                                                                  |                      |                                                                            |                                                                                  |                             |                                                                    |                                                                                  |                         |                                                                   |                                                                             |                      |                                                                   |    |                     |                                                                    |    |                           |                                                                   |    |     |  |  |                    |                                                                   |    |      |  |  |                    |                                                                    |    |
| step length [cm]*                   | MD <sup>+</sup> = 5, p < 0.05, 95 % CI [2 to 8], k = 5, n = 296                                                                                                                                                                                                                                                                                                                                                                                                                                                                                                                                                                                                                                                      | <input type="checkbox"/> sign. <input checked="" type="checkbox"/> n.s. high                                                                                                                                                                                                                                                                                                                                                                                                                                                                                                                                                                                                                                                                                                                                                                                                                                                                                                                                                                                                                                                                                                                                                                                                                                                                                                                                                                                                                                                                                                                                                                                                                                                                                                                                                                                                                                                                                                                                                                                                                                                                                                                                                                                                                                                                                                                                                                     |                                 |                                                                     |                                                                                  |                                   |                                                                   |                                                                             |                                   |                                                                    |                                                                              |                              |                                                                       |                                                                              |                               |                                                                       |                                                                              |                                    |                                                                       |                                                                                  |                      |                                                                            |                                                                                  |                             |                                                                    |                                                                                  |                         |                                                                   |                                                                             |                      |                                                                   |    |                     |                                                                    |    |                           |                                                                   |    |     |  |  |                    |                                                                   |    |      |  |  |                    |                                                                    |    |
| balance (funct. reach test)*        | MD <sup>+</sup> = 3.9, p < 0.05, 95 % CI [0.3 to 7.0], k = 6, n = 242                                                                                                                                                                                                                                                                                                                                                                                                                                                                                                                                                                                                                                                | <input type="checkbox"/> sign. <input checked="" type="checkbox"/> n.s. high                                                                                                                                                                                                                                                                                                                                                                                                                                                                                                                                                                                                                                                                                                                                                                                                                                                                                                                                                                                                                                                                                                                                                                                                                                                                                                                                                                                                                                                                                                                                                                                                                                                                                                                                                                                                                                                                                                                                                                                                                                                                                                                                                                                                                                                                                                                                                                     |                                 |                                                                     |                                                                                  |                                   |                                                                   |                                                                             |                                   |                                                                    |                                                                              |                              |                                                                       |                                                                              |                               |                                                                       |                                                                              |                                    |                                                                       |                                                                                  |                      |                                                                            |                                                                                  |                             |                                                                    |                                                                                  |                         |                                                                   |                                                                             |                      |                                                                   |    |                     |                                                                    |    |                           |                                                                   |    |     |  |  |                    |                                                                   |    |      |  |  |                    |                                                                    |    |
| balance (Berg-balance-scale)*       | MD <sup>+</sup> = 3.6, p < 0.05, 95 % CI [0.3 to 7.0], k = 6, n = 722                                                                                                                                                                                                                                                                                                                                                                                                                                                                                                                                                                                                                                                | <input checked="" type="checkbox"/> sign. <input type="checkbox"/> n.s. high                                                                                                                                                                                                                                                                                                                                                                                                                                                                                                                                                                                                                                                                                                                                                                                                                                                                                                                                                                                                                                                                                                                                                                                                                                                                                                                                                                                                                                                                                                                                                                                                                                                                                                                                                                                                                                                                                                                                                                                                                                                                                                                                                                                                                                                                                                                                                                     |                                 |                                                                     |                                                                                  |                                   |                                                                   |                                                                             |                                   |                                                                    |                                                                              |                              |                                                                       |                                                                              |                               |                                                                       |                                                                              |                                    |                                                                       |                                                                                  |                      |                                                                            |                                                                                  |                             |                                                                    |                                                                                  |                         |                                                                   |                                                                             |                      |                                                                   |    |                     |                                                                    |    |                           |                                                                   |    |     |  |  |                    |                                                                   |    |      |  |  |                    |                                                                    |    |
| strength (30-second sit-to-stand)*  | MD <sup>+</sup> = 2.1, p < 0.05, 95 % CI [0.3 to 3.9], k = 4, n = 278                                                                                                                                                                                                                                                                                                                                                                                                                                                                                                                                                                                                                                                | <input checked="" type="checkbox"/> sign. <input type="checkbox"/> n.s. moderate                                                                                                                                                                                                                                                                                                                                                                                                                                                                                                                                                                                                                                                                                                                                                                                                                                                                                                                                                                                                                                                                                                                                                                                                                                                                                                                                                                                                                                                                                                                                                                                                                                                                                                                                                                                                                                                                                                                                                                                                                                                                                                                                                                                                                                                                                                                                                                 |                                 |                                                                     |                                                                                  |                                   |                                                                   |                                                                             |                                   |                                                                    |                                                                              |                              |                                                                       |                                                                              |                               |                                                                       |                                                                              |                                    |                                                                       |                                                                                  |                      |                                                                            |                                                                                  |                             |                                                                    |                                                                                  |                         |                                                                   |                                                                             |                      |                                                                   |    |                     |                                                                    |    |                           |                                                                   |    |     |  |  |                    |                                                                   |    |      |  |  |                    |                                                                    |    |
| walking speed [m/s]*                | MD <sup>+</sup> = 0.13, p < 0.05, 95 % CI [0.03 to 0.24], k = 7, n = 568                                                                                                                                                                                                                                                                                                                                                                                                                                                                                                                                                                                                                                             | <input checked="" type="checkbox"/> sign. <input type="checkbox"/> n.s. moderate                                                                                                                                                                                                                                                                                                                                                                                                                                                                                                                                                                                                                                                                                                                                                                                                                                                                                                                                                                                                                                                                                                                                                                                                                                                                                                                                                                                                                                                                                                                                                                                                                                                                                                                                                                                                                                                                                                                                                                                                                                                                                                                                                                                                                                                                                                                                                                 |                                 |                                                                     |                                                                                  |                                   |                                                                   |                                                                             |                                   |                                                                    |                                                                              |                              |                                                                       |                                                                              |                               |                                                                       |                                                                              |                                    |                                                                       |                                                                                  |                      |                                                                            |                                                                                  |                             |                                                                    |                                                                                  |                         |                                                                   |                                                                             |                      |                                                                   |    |                     |                                                                    |    |                           |                                                                   |    |     |  |  |                    |                                                                   |    |      |  |  |                    |                                                                    |    |
| mobility (Timed Up and Go)*         | MD <sup>-</sup> = -1, p < 0.05, 95 % CI [-2 to 0], k = 11, n = 606                                                                                                                                                                                                                                                                                                                                                                                                                                                                                                                                                                                                                                                   | <input type="checkbox"/> sign. <input checked="" type="checkbox"/> n.s. moderate                                                                                                                                                                                                                                                                                                                                                                                                                                                                                                                                                                                                                                                                                                                                                                                                                                                                                                                                                                                                                                                                                                                                                                                                                                                                                                                                                                                                                                                                                                                                                                                                                                                                                                                                                                                                                                                                                                                                                                                                                                                                                                                                                                                                                                                                                                                                                                 |                                 |                                                                     |                                                                                  |                                   |                                                                   |                                                                             |                                   |                                                                    |                                                                              |                              |                                                                       |                                                                              |                               |                                                                       |                                                                              |                                    |                                                                       |                                                                                  |                      |                                                                            |                                                                                  |                             |                                                                    |                                                                                  |                         |                                                                   |                                                                             |                      |                                                                   |    |                     |                                                                    |    |                           |                                                                   |    |     |  |  |                    |                                                                   |    |      |  |  |                    |                                                                    |    |
| fall rate                           | OR = 0.98, p > 0.05, 95 % CI [0.49 to 1.95], k = 3, n = 191                                                                                                                                                                                                                                                                                                                                                                                                                                                                                                                                                                                                                                                          | <input type="checkbox"/> sign. <input checked="" type="checkbox"/> n.s. low                                                                                                                                                                                                                                                                                                                                                                                                                                                                                                                                                                                                                                                                                                                                                                                                                                                                                                                                                                                                                                                                                                                                                                                                                                                                                                                                                                                                                                                                                                                                                                                                                                                                                                                                                                                                                                                                                                                                                                                                                                                                                                                                                                                                                                                                                                                                                                      |                                 |                                                                     |                                                                                  |                                   |                                                                   |                                                                             |                                   |                                                                    |                                                                              |                              |                                                                       |                                                                              |                               |                                                                       |                                                                              |                                    |                                                                       |                                                                                  |                      |                                                                            |                                                                                  |                             |                                                                    |                                                                                  |                         |                                                                   |                                                                             |                      |                                                                   |    |                     |                                                                    |    |                           |                                                                   |    |     |  |  |                    |                                                                   |    |      |  |  |                    |                                                                    |    |
| <p>Liang et al.<br/>2018 [9]</p>    | <p><b>POPULATION:</b><br/> <input type="checkbox"/> healthy older adults<br/> <input checked="" type="checkbox"/> older adults with mNCD<br/> <input type="checkbox"/> older adults with Dementia</p> <p><b>INTERVENTION:</b><br/> <input type="checkbox"/> aerobic training<br/> <input type="checkbox"/> resistance training<br/> <input type="checkbox"/> balance training<br/> <input type="checkbox"/> multicomponent physical training<br/> <input checked="" type="checkbox"/> mixed physical training</p> <p><b>COMPARISON:</b><br/> mixed (i.e. cognitive interventions, control group alone or in any combination)</p>                                                                                     | <p><input checked="" type="checkbox"/> Cognition<br/>global cognition (MMSE) SMD<sup>+</sup> = 0.35, p &gt; 0.05, 95 % CI [-0.12 to 0.82], k = 4 <input checked="" type="checkbox"/> sign. <input type="checkbox"/> n.s.</p> <p><input type="checkbox"/> Brain / Neurochemicals / HRV<br/>NR</p> <p><input type="checkbox"/> Physical Outcomes, Mobility, and Activities of Daily Living<br/>NR</p> <p><input type="checkbox"/> Psychosocial Outcomes<br/>NR</p>                                                                                                                                                                                                                                                                                                                                                                                                                                                                                                                                                                                                                                                                                                                                                                                                                                                                                                                                                                                                                                                                                                                                                                                                                                                                                                                                                                                                                                                                                                                                                                                                                                                                                                                                                                                                                                                                                                                                                                                 |                                 |                                                                     |                                                                                  |                                   |                                                                   |                                                                             |                                   |                                                                    |                                                                              |                              |                                                                       |                                                                              |                               |                                                                       |                                                                              |                                    |                                                                       |                                                                                  |                      |                                                                            |                                                                                  |                             |                                                                    |                                                                                  |                         |                                                                   |                                                                             |                      |                                                                   |    |                     |                                                                    |    |                           |                                                                   |    |     |  |  |                    |                                                                   |    |      |  |  |                    |                                                                    |    |
| <p>Northey et al.<br/>2018 [30]</p> | <p><b>POPULATION:</b><br/> <input checked="" type="checkbox"/> healthy older adults<br/> <input checked="" type="checkbox"/> older adults with mNCD<br/> <input type="checkbox"/> older adults with Dementia</p> <p><b>INTERVENTION:</b><br/> <input checked="" type="checkbox"/> aerobic training<br/> <input checked="" type="checkbox"/> resistance training<br/> <input type="checkbox"/> balance training<br/> <input checked="" type="checkbox"/> multicomponent physical training<br/> <input type="checkbox"/> mixed physical training</p> <p><b>COMPARISON:</b><br/> mixed (i.e. (1) sham training or alternative active treatment, (2) attention control, (3) no contact)</p>                              | <p><input checked="" type="checkbox"/> Cognition</p> <table border="0"> <tr> <td>overall (pooled)<sup>(1)</sup></td> <td>SMD<sup>+</sup> = 0.13, p &gt; 0.05, 95 % CI [-0.06 to 0.32], n = 120</td> <td>NR</td> </tr> <tr> <td>overall (pooled)<sup>(2)**</sup></td> <td>SMD<sup>+</sup> = 0.48, p &lt; 0.01, 95 % CI [0.14 to 0.82], n = 17</td> <td>NR</td> </tr> <tr> <td>overall (pooled)<sup>(3)**</sup></td> <td>SMD<sup>+</sup> = 0.34, p &lt; 0.01, 95 % CI [0.17 to 0.51], n = 189</td> <td>NR</td> </tr> <tr> <td>memory (pooled)**</td> <td>SMD<sup>+</sup> = 0.36, p &lt; 0.01, 95 % CI [0.22 to 0.50], n = 81</td> <td>NR</td> </tr> <tr> <td>executive funct. (pooled)**</td> <td>SMD<sup>+</sup> = 0.34, p &lt; 0.01, 95 % CI [0.20 to 0.47], n = 94</td> <td>NR</td> </tr> <tr> <td>overall (mult.comp.)**</td> <td>SMD<sup>+</sup> = 0.33, p &lt; 0.01, 95 % CI [0.14 to 0.53], n = 80</td> <td>NR</td> </tr> <tr> <td>overall (pooled)**</td> <td>SMD<sup>+</sup> = 0.29, p &lt; 0.01, 95 % CI [0.17 to 0.41], k = 36, n = 333</td> <td><input checked="" type="checkbox"/> sign. <input type="checkbox"/> n.s. moderate</td> </tr> <tr> <td>overall (resistance)**</td> <td>SMD<sup>+</sup> = 0.29, p &lt; 0.01, 95 % CI [0.13 to 0.44], n = 80</td> <td>NR</td> </tr> <tr> <td>work. memory (pooled)**</td> <td>SMD<sup>+</sup> = 0.29, p &lt; 0.01, 95 % CI [0.12 to 0.45], n = 81</td> <td>NR</td> </tr> <tr> <td>attention (pooled)**</td> <td>SMD<sup>+</sup> = 0.27, p &lt; 0.01, 95 % CI [0.14 to 0.41], n = 87</td> <td>NR</td> </tr> <tr> <td>overall (aerobic)**</td> <td>SMD<sup>+</sup> = 0.24, p &lt; 0.01, 95 % CI [0.10 to 0.37], n = 153</td> <td>NR</td> </tr> <tr> <td>global cognition (pooled)</td> <td>SMD<sup>+</sup> = 0.16, p &gt; 0.05, 95 % CI [-0.14 to 0.47], n = 6</td> <td>NR</td> </tr> <tr> <td>HOA</td> <td></td> <td></td> </tr> <tr> <td>overall (pooled)**</td> <td>SMD<sup>+</sup> = 0.36, p &lt; 0.01, 95 % CI [0.04 to 0.68], n = 41</td> <td>NR</td> </tr> <tr> <td>mNCD</td> <td></td> <td></td> </tr> <tr> <td>overall (pooled)**</td> <td>SMD<sup>+</sup> = 0.28, p &lt; 0.01, 95 % CI [0.11 to 0.44], n = 197</td> <td>NR</td> </tr> </table> <p><input type="checkbox"/> Brain / Neurochemicals / HRV<br/>NR</p> <p><input type="checkbox"/> Physical Outcomes, Mobility, and Activities of Daily Living<br/>NR</p> <p><input type="checkbox"/> Psychosocial Outcomes<br/>NR</p> | overall (pooled) <sup>(1)</sup> | SMD <sup>+</sup> = 0.13, p > 0.05, 95 % CI [-0.06 to 0.32], n = 120 | NR                                                                               | overall (pooled) <sup>(2)**</sup> | SMD <sup>+</sup> = 0.48, p < 0.01, 95 % CI [0.14 to 0.82], n = 17 | NR                                                                          | overall (pooled) <sup>(3)**</sup> | SMD <sup>+</sup> = 0.34, p < 0.01, 95 % CI [0.17 to 0.51], n = 189 | NR                                                                           | memory (pooled)**            | SMD <sup>+</sup> = 0.36, p < 0.01, 95 % CI [0.22 to 0.50], n = 81     | NR                                                                           | executive funct. (pooled)**   | SMD <sup>+</sup> = 0.34, p < 0.01, 95 % CI [0.20 to 0.47], n = 94     | NR                                                                           | overall (mult.comp.)**             | SMD <sup>+</sup> = 0.33, p < 0.01, 95 % CI [0.14 to 0.53], n = 80     | NR                                                                               | overall (pooled)**   | SMD <sup>+</sup> = 0.29, p < 0.01, 95 % CI [0.17 to 0.41], k = 36, n = 333 | <input checked="" type="checkbox"/> sign. <input type="checkbox"/> n.s. moderate | overall (resistance)**      | SMD <sup>+</sup> = 0.29, p < 0.01, 95 % CI [0.13 to 0.44], n = 80  | NR                                                                               | work. memory (pooled)** | SMD <sup>+</sup> = 0.29, p < 0.01, 95 % CI [0.12 to 0.45], n = 81 | NR                                                                          | attention (pooled)** | SMD <sup>+</sup> = 0.27, p < 0.01, 95 % CI [0.14 to 0.41], n = 87 | NR | overall (aerobic)** | SMD <sup>+</sup> = 0.24, p < 0.01, 95 % CI [0.10 to 0.37], n = 153 | NR | global cognition (pooled) | SMD <sup>+</sup> = 0.16, p > 0.05, 95 % CI [-0.14 to 0.47], n = 6 | NR | HOA |  |  | overall (pooled)** | SMD <sup>+</sup> = 0.36, p < 0.01, 95 % CI [0.04 to 0.68], n = 41 | NR | mNCD |  |  | overall (pooled)** | SMD <sup>+</sup> = 0.28, p < 0.01, 95 % CI [0.11 to 0.44], n = 197 | NR |
| overall (pooled) <sup>(1)</sup>     | SMD <sup>+</sup> = 0.13, p > 0.05, 95 % CI [-0.06 to 0.32], n = 120                                                                                                                                                                                                                                                                                                                                                                                                                                                                                                                                                                                                                                                  | NR                                                                                                                                                                                                                                                                                                                                                                                                                                                                                                                                                                                                                                                                                                                                                                                                                                                                                                                                                                                                                                                                                                                                                                                                                                                                                                                                                                                                                                                                                                                                                                                                                                                                                                                                                                                                                                                                                                                                                                                                                                                                                                                                                                                                                                                                                                                                                                                                                                               |                                 |                                                                     |                                                                                  |                                   |                                                                   |                                                                             |                                   |                                                                    |                                                                              |                              |                                                                       |                                                                              |                               |                                                                       |                                                                              |                                    |                                                                       |                                                                                  |                      |                                                                            |                                                                                  |                             |                                                                    |                                                                                  |                         |                                                                   |                                                                             |                      |                                                                   |    |                     |                                                                    |    |                           |                                                                   |    |     |  |  |                    |                                                                   |    |      |  |  |                    |                                                                    |    |
| overall (pooled) <sup>(2)**</sup>   | SMD <sup>+</sup> = 0.48, p < 0.01, 95 % CI [0.14 to 0.82], n = 17                                                                                                                                                                                                                                                                                                                                                                                                                                                                                                                                                                                                                                                    | NR                                                                                                                                                                                                                                                                                                                                                                                                                                                                                                                                                                                                                                                                                                                                                                                                                                                                                                                                                                                                                                                                                                                                                                                                                                                                                                                                                                                                                                                                                                                                                                                                                                                                                                                                                                                                                                                                                                                                                                                                                                                                                                                                                                                                                                                                                                                                                                                                                                               |                                 |                                                                     |                                                                                  |                                   |                                                                   |                                                                             |                                   |                                                                    |                                                                              |                              |                                                                       |                                                                              |                               |                                                                       |                                                                              |                                    |                                                                       |                                                                                  |                      |                                                                            |                                                                                  |                             |                                                                    |                                                                                  |                         |                                                                   |                                                                             |                      |                                                                   |    |                     |                                                                    |    |                           |                                                                   |    |     |  |  |                    |                                                                   |    |      |  |  |                    |                                                                    |    |
| overall (pooled) <sup>(3)**</sup>   | SMD <sup>+</sup> = 0.34, p < 0.01, 95 % CI [0.17 to 0.51], n = 189                                                                                                                                                                                                                                                                                                                                                                                                                                                                                                                                                                                                                                                   | NR                                                                                                                                                                                                                                                                                                                                                                                                                                                                                                                                                                                                                                                                                                                                                                                                                                                                                                                                                                                                                                                                                                                                                                                                                                                                                                                                                                                                                                                                                                                                                                                                                                                                                                                                                                                                                                                                                                                                                                                                                                                                                                                                                                                                                                                                                                                                                                                                                                               |                                 |                                                                     |                                                                                  |                                   |                                                                   |                                                                             |                                   |                                                                    |                                                                              |                              |                                                                       |                                                                              |                               |                                                                       |                                                                              |                                    |                                                                       |                                                                                  |                      |                                                                            |                                                                                  |                             |                                                                    |                                                                                  |                         |                                                                   |                                                                             |                      |                                                                   |    |                     |                                                                    |    |                           |                                                                   |    |     |  |  |                    |                                                                   |    |      |  |  |                    |                                                                    |    |
| memory (pooled)**                   | SMD <sup>+</sup> = 0.36, p < 0.01, 95 % CI [0.22 to 0.50], n = 81                                                                                                                                                                                                                                                                                                                                                                                                                                                                                                                                                                                                                                                    | NR                                                                                                                                                                                                                                                                                                                                                                                                                                                                                                                                                                                                                                                                                                                                                                                                                                                                                                                                                                                                                                                                                                                                                                                                                                                                                                                                                                                                                                                                                                                                                                                                                                                                                                                                                                                                                                                                                                                                                                                                                                                                                                                                                                                                                                                                                                                                                                                                                                               |                                 |                                                                     |                                                                                  |                                   |                                                                   |                                                                             |                                   |                                                                    |                                                                              |                              |                                                                       |                                                                              |                               |                                                                       |                                                                              |                                    |                                                                       |                                                                                  |                      |                                                                            |                                                                                  |                             |                                                                    |                                                                                  |                         |                                                                   |                                                                             |                      |                                                                   |    |                     |                                                                    |    |                           |                                                                   |    |     |  |  |                    |                                                                   |    |      |  |  |                    |                                                                    |    |
| executive funct. (pooled)**         | SMD <sup>+</sup> = 0.34, p < 0.01, 95 % CI [0.20 to 0.47], n = 94                                                                                                                                                                                                                                                                                                                                                                                                                                                                                                                                                                                                                                                    | NR                                                                                                                                                                                                                                                                                                                                                                                                                                                                                                                                                                                                                                                                                                                                                                                                                                                                                                                                                                                                                                                                                                                                                                                                                                                                                                                                                                                                                                                                                                                                                                                                                                                                                                                                                                                                                                                                                                                                                                                                                                                                                                                                                                                                                                                                                                                                                                                                                                               |                                 |                                                                     |                                                                                  |                                   |                                                                   |                                                                             |                                   |                                                                    |                                                                              |                              |                                                                       |                                                                              |                               |                                                                       |                                                                              |                                    |                                                                       |                                                                                  |                      |                                                                            |                                                                                  |                             |                                                                    |                                                                                  |                         |                                                                   |                                                                             |                      |                                                                   |    |                     |                                                                    |    |                           |                                                                   |    |     |  |  |                    |                                                                   |    |      |  |  |                    |                                                                    |    |
| overall (mult.comp.)**              | SMD <sup>+</sup> = 0.33, p < 0.01, 95 % CI [0.14 to 0.53], n = 80                                                                                                                                                                                                                                                                                                                                                                                                                                                                                                                                                                                                                                                    | NR                                                                                                                                                                                                                                                                                                                                                                                                                                                                                                                                                                                                                                                                                                                                                                                                                                                                                                                                                                                                                                                                                                                                                                                                                                                                                                                                                                                                                                                                                                                                                                                                                                                                                                                                                                                                                                                                                                                                                                                                                                                                                                                                                                                                                                                                                                                                                                                                                                               |                                 |                                                                     |                                                                                  |                                   |                                                                   |                                                                             |                                   |                                                                    |                                                                              |                              |                                                                       |                                                                              |                               |                                                                       |                                                                              |                                    |                                                                       |                                                                                  |                      |                                                                            |                                                                                  |                             |                                                                    |                                                                                  |                         |                                                                   |                                                                             |                      |                                                                   |    |                     |                                                                    |    |                           |                                                                   |    |     |  |  |                    |                                                                   |    |      |  |  |                    |                                                                    |    |
| overall (pooled)**                  | SMD <sup>+</sup> = 0.29, p < 0.01, 95 % CI [0.17 to 0.41], k = 36, n = 333                                                                                                                                                                                                                                                                                                                                                                                                                                                                                                                                                                                                                                           | <input checked="" type="checkbox"/> sign. <input type="checkbox"/> n.s. moderate                                                                                                                                                                                                                                                                                                                                                                                                                                                                                                                                                                                                                                                                                                                                                                                                                                                                                                                                                                                                                                                                                                                                                                                                                                                                                                                                                                                                                                                                                                                                                                                                                                                                                                                                                                                                                                                                                                                                                                                                                                                                                                                                                                                                                                                                                                                                                                 |                                 |                                                                     |                                                                                  |                                   |                                                                   |                                                                             |                                   |                                                                    |                                                                              |                              |                                                                       |                                                                              |                               |                                                                       |                                                                              |                                    |                                                                       |                                                                                  |                      |                                                                            |                                                                                  |                             |                                                                    |                                                                                  |                         |                                                                   |                                                                             |                      |                                                                   |    |                     |                                                                    |    |                           |                                                                   |    |     |  |  |                    |                                                                   |    |      |  |  |                    |                                                                    |    |
| overall (resistance)**              | SMD <sup>+</sup> = 0.29, p < 0.01, 95 % CI [0.13 to 0.44], n = 80                                                                                                                                                                                                                                                                                                                                                                                                                                                                                                                                                                                                                                                    | NR                                                                                                                                                                                                                                                                                                                                                                                                                                                                                                                                                                                                                                                                                                                                                                                                                                                                                                                                                                                                                                                                                                                                                                                                                                                                                                                                                                                                                                                                                                                                                                                                                                                                                                                                                                                                                                                                                                                                                                                                                                                                                                                                                                                                                                                                                                                                                                                                                                               |                                 |                                                                     |                                                                                  |                                   |                                                                   |                                                                             |                                   |                                                                    |                                                                              |                              |                                                                       |                                                                              |                               |                                                                       |                                                                              |                                    |                                                                       |                                                                                  |                      |                                                                            |                                                                                  |                             |                                                                    |                                                                                  |                         |                                                                   |                                                                             |                      |                                                                   |    |                     |                                                                    |    |                           |                                                                   |    |     |  |  |                    |                                                                   |    |      |  |  |                    |                                                                    |    |
| work. memory (pooled)**             | SMD <sup>+</sup> = 0.29, p < 0.01, 95 % CI [0.12 to 0.45], n = 81                                                                                                                                                                                                                                                                                                                                                                                                                                                                                                                                                                                                                                                    | NR                                                                                                                                                                                                                                                                                                                                                                                                                                                                                                                                                                                                                                                                                                                                                                                                                                                                                                                                                                                                                                                                                                                                                                                                                                                                                                                                                                                                                                                                                                                                                                                                                                                                                                                                                                                                                                                                                                                                                                                                                                                                                                                                                                                                                                                                                                                                                                                                                                               |                                 |                                                                     |                                                                                  |                                   |                                                                   |                                                                             |                                   |                                                                    |                                                                              |                              |                                                                       |                                                                              |                               |                                                                       |                                                                              |                                    |                                                                       |                                                                                  |                      |                                                                            |                                                                                  |                             |                                                                    |                                                                                  |                         |                                                                   |                                                                             |                      |                                                                   |    |                     |                                                                    |    |                           |                                                                   |    |     |  |  |                    |                                                                   |    |      |  |  |                    |                                                                    |    |
| attention (pooled)**                | SMD <sup>+</sup> = 0.27, p < 0.01, 95 % CI [0.14 to 0.41], n = 87                                                                                                                                                                                                                                                                                                                                                                                                                                                                                                                                                                                                                                                    | NR                                                                                                                                                                                                                                                                                                                                                                                                                                                                                                                                                                                                                                                                                                                                                                                                                                                                                                                                                                                                                                                                                                                                                                                                                                                                                                                                                                                                                                                                                                                                                                                                                                                                                                                                                                                                                                                                                                                                                                                                                                                                                                                                                                                                                                                                                                                                                                                                                                               |                                 |                                                                     |                                                                                  |                                   |                                                                   |                                                                             |                                   |                                                                    |                                                                              |                              |                                                                       |                                                                              |                               |                                                                       |                                                                              |                                    |                                                                       |                                                                                  |                      |                                                                            |                                                                                  |                             |                                                                    |                                                                                  |                         |                                                                   |                                                                             |                      |                                                                   |    |                     |                                                                    |    |                           |                                                                   |    |     |  |  |                    |                                                                   |    |      |  |  |                    |                                                                    |    |
| overall (aerobic)**                 | SMD <sup>+</sup> = 0.24, p < 0.01, 95 % CI [0.10 to 0.37], n = 153                                                                                                                                                                                                                                                                                                                                                                                                                                                                                                                                                                                                                                                   | NR                                                                                                                                                                                                                                                                                                                                                                                                                                                                                                                                                                                                                                                                                                                                                                                                                                                                                                                                                                                                                                                                                                                                                                                                                                                                                                                                                                                                                                                                                                                                                                                                                                                                                                                                                                                                                                                                                                                                                                                                                                                                                                                                                                                                                                                                                                                                                                                                                                               |                                 |                                                                     |                                                                                  |                                   |                                                                   |                                                                             |                                   |                                                                    |                                                                              |                              |                                                                       |                                                                              |                               |                                                                       |                                                                              |                                    |                                                                       |                                                                                  |                      |                                                                            |                                                                                  |                             |                                                                    |                                                                                  |                         |                                                                   |                                                                             |                      |                                                                   |    |                     |                                                                    |    |                           |                                                                   |    |     |  |  |                    |                                                                   |    |      |  |  |                    |                                                                    |    |
| global cognition (pooled)           | SMD <sup>+</sup> = 0.16, p > 0.05, 95 % CI [-0.14 to 0.47], n = 6                                                                                                                                                                                                                                                                                                                                                                                                                                                                                                                                                                                                                                                    | NR                                                                                                                                                                                                                                                                                                                                                                                                                                                                                                                                                                                                                                                                                                                                                                                                                                                                                                                                                                                                                                                                                                                                                                                                                                                                                                                                                                                                                                                                                                                                                                                                                                                                                                                                                                                                                                                                                                                                                                                                                                                                                                                                                                                                                                                                                                                                                                                                                                               |                                 |                                                                     |                                                                                  |                                   |                                                                   |                                                                             |                                   |                                                                    |                                                                              |                              |                                                                       |                                                                              |                               |                                                                       |                                                                              |                                    |                                                                       |                                                                                  |                      |                                                                            |                                                                                  |                             |                                                                    |                                                                                  |                         |                                                                   |                                                                             |                      |                                                                   |    |                     |                                                                    |    |                           |                                                                   |    |     |  |  |                    |                                                                   |    |      |  |  |                    |                                                                    |    |
| HOA                                 |                                                                                                                                                                                                                                                                                                                                                                                                                                                                                                                                                                                                                                                                                                                      |                                                                                                                                                                                                                                                                                                                                                                                                                                                                                                                                                                                                                                                                                                                                                                                                                                                                                                                                                                                                                                                                                                                                                                                                                                                                                                                                                                                                                                                                                                                                                                                                                                                                                                                                                                                                                                                                                                                                                                                                                                                                                                                                                                                                                                                                                                                                                                                                                                                  |                                 |                                                                     |                                                                                  |                                   |                                                                   |                                                                             |                                   |                                                                    |                                                                              |                              |                                                                       |                                                                              |                               |                                                                       |                                                                              |                                    |                                                                       |                                                                                  |                      |                                                                            |                                                                                  |                             |                                                                    |                                                                                  |                         |                                                                   |                                                                             |                      |                                                                   |    |                     |                                                                    |    |                           |                                                                   |    |     |  |  |                    |                                                                   |    |      |  |  |                    |                                                                    |    |
| overall (pooled)**                  | SMD <sup>+</sup> = 0.36, p < 0.01, 95 % CI [0.04 to 0.68], n = 41                                                                                                                                                                                                                                                                                                                                                                                                                                                                                                                                                                                                                                                    | NR                                                                                                                                                                                                                                                                                                                                                                                                                                                                                                                                                                                                                                                                                                                                                                                                                                                                                                                                                                                                                                                                                                                                                                                                                                                                                                                                                                                                                                                                                                                                                                                                                                                                                                                                                                                                                                                                                                                                                                                                                                                                                                                                                                                                                                                                                                                                                                                                                                               |                                 |                                                                     |                                                                                  |                                   |                                                                   |                                                                             |                                   |                                                                    |                                                                              |                              |                                                                       |                                                                              |                               |                                                                       |                                                                              |                                    |                                                                       |                                                                                  |                      |                                                                            |                                                                                  |                             |                                                                    |                                                                                  |                         |                                                                   |                                                                             |                      |                                                                   |    |                     |                                                                    |    |                           |                                                                   |    |     |  |  |                    |                                                                   |    |      |  |  |                    |                                                                    |    |
| mNCD                                |                                                                                                                                                                                                                                                                                                                                                                                                                                                                                                                                                                                                                                                                                                                      |                                                                                                                                                                                                                                                                                                                                                                                                                                                                                                                                                                                                                                                                                                                                                                                                                                                                                                                                                                                                                                                                                                                                                                                                                                                                                                                                                                                                                                                                                                                                                                                                                                                                                                                                                                                                                                                                                                                                                                                                                                                                                                                                                                                                                                                                                                                                                                                                                                                  |                                 |                                                                     |                                                                                  |                                   |                                                                   |                                                                             |                                   |                                                                    |                                                                              |                              |                                                                       |                                                                              |                               |                                                                       |                                                                              |                                    |                                                                       |                                                                                  |                      |                                                                            |                                                                                  |                             |                                                                    |                                                                                  |                         |                                                                   |                                                                             |                      |                                                                   |    |                     |                                                                    |    |                           |                                                                   |    |     |  |  |                    |                                                                   |    |      |  |  |                    |                                                                    |    |
| overall (pooled)**                  | SMD <sup>+</sup> = 0.28, p < 0.01, 95 % CI [0.11 to 0.44], n = 197                                                                                                                                                                                                                                                                                                                                                                                                                                                                                                                                                                                                                                                   | NR                                                                                                                                                                                                                                                                                                                                                                                                                                                                                                                                                                                                                                                                                                                                                                                                                                                                                                                                                                                                                                                                                                                                                                                                                                                                                                                                                                                                                                                                                                                                                                                                                                                                                                                                                                                                                                                                                                                                                                                                                                                                                                                                                                                                                                                                                                                                                                                                                                               |                                 |                                                                     |                                                                                  |                                   |                                                                   |                                                                             |                                   |                                                                    |                                                                              |                              |                                                                       |                                                                              |                               |                                                                       |                                                                              |                                    |                                                                       |                                                                                  |                      |                                                                            |                                                                                  |                             |                                                                    |                                                                                  |                         |                                                                   |                                                                             |                      |                                                                   |    |                     |                                                                    |    |                           |                                                                   |    |     |  |  |                    |                                                                   |    |      |  |  |                    |                                                                    |    |
|                                     |                                                                                                                                                                                                                                                                                                                                                                                                                                                                                                                                                                                                                                                                                                                      |                                                                                                                                                                                                                                                                                                                                                                                                                                                                                                                                                                                                                                                                                                                                                                                                                                                                                                                                                                                                                                                                                                                                                                                                                                                                                                                                                                                                                                                                                                                                                                                                                                                                                                                                                                                                                                                                                                                                                                                                                                                                                                                                                                                                                                                                                                                                                                                                                                                  |                                 |                                                                     |                                                                                  |                                   |                                                                   |                                                                             |                                   |                                                                    |                                                                              |                              |                                                                       |                                                                              |                               |                                                                       |                                                                              |                                    |                                                                       |                                                                                  |                      |                                                                            |                                                                                  |                             |                                                                    |                                                                                  |                         |                                                                   |                                                                             |                      |                                                                   |    |                     |                                                                    |    |                           |                                                                   |    |     |  |  |                    |                                                                   |    |      |  |  |                    |                                                                    |    |



|                                               |                                                                                                                                                                                                                                                                                                                                                                                                                                                                                                                                                                                                                                                                                                                                         |                                                                                                                                                                                                                                                                                                                                                                                                                                                                                                                                                                                                                                                                                                                                                                                                                                                                                                                                                                                                                                                                                                                                                                                                        |
|-----------------------------------------------|-----------------------------------------------------------------------------------------------------------------------------------------------------------------------------------------------------------------------------------------------------------------------------------------------------------------------------------------------------------------------------------------------------------------------------------------------------------------------------------------------------------------------------------------------------------------------------------------------------------------------------------------------------------------------------------------------------------------------------------------|--------------------------------------------------------------------------------------------------------------------------------------------------------------------------------------------------------------------------------------------------------------------------------------------------------------------------------------------------------------------------------------------------------------------------------------------------------------------------------------------------------------------------------------------------------------------------------------------------------------------------------------------------------------------------------------------------------------------------------------------------------------------------------------------------------------------------------------------------------------------------------------------------------------------------------------------------------------------------------------------------------------------------------------------------------------------------------------------------------------------------------------------------------------------------------------------------------|
| <p>Kelly et al. 2014 [34]<br/>(continued)</p> | <p><b>POPULATION:</b><br/> <input checked="" type="checkbox"/> healthy older adults<br/> <input type="checkbox"/> older adults with mNCD<br/> <input type="checkbox"/> older adults with Dementia</p> <p><b>INTERVENTION:</b><br/> <input checked="" type="checkbox"/> aerobic training<br/> <input checked="" type="checkbox"/> resistance training<br/> <input type="checkbox"/> balance training<br/> <input type="checkbox"/> multicomponent physical training<br/> <input type="checkbox"/> mixed physical training</p> <p><b>COMPARISON:</b><br/>           (1) stretching/toning<br/>           (2) non- training active control (i.e. health education, watching movies, or socializing)<br/>           (3) no intervention</p> | <p>resistance training<br/>           reasoning <sup>(1)**</sup> SMD<sup>+</sup> = 3.16, p = 0.003, 95 % CI [1.07 to 5.24], k = 2, n = 135<br/>           working memory <sup>(1)</sup> SMD<sup>+</sup> = 0.10, p = 0.47, 95 % CI [- 0.17 to 0.36], k = 3, n = 236<br/>           attention <sup>(1)</sup> SMD<sup>+</sup> = -0.12, p = 0.37, 95 % CI [- 0.39 to 0.14], k = 3, n = 236<br/>           working memory <sup>(2)</sup> SMD<sup>+</sup> = 0.17, p = 0.31, 95 % CI [- 0.16 to 0.50], k = 2, n = 152<br/>           attention <sup>(2)</sup> SMD<sup>+</sup> = -0.06, p = 0.62, 95 % CI [- 0.30 to 0.18], k = 3, n = 271</p> <p><input type="checkbox"/> Brain / Neurochemicals / HRV<br/>NR</p> <p><input type="checkbox"/> Physical Outcomes, Mobility, and Activities of Daily Living<br/>NR</p> <p><input type="checkbox"/> Psychosocial Outcomes<br/>NR</p>                                                                                                                                                                                                                                                                                                                             |
| <p>Forbes et al. 2015 [35]</p>                | <p><b>POPULATION:</b><br/> <input type="checkbox"/> healthy older adults<br/> <input checked="" type="checkbox"/> older adults with mNCD<br/> <input type="checkbox"/> older adults with Dementia</p> <p><b>INTERVENTION:</b><br/> <input type="checkbox"/> aerobic training<br/> <input type="checkbox"/> resistance training<br/> <input type="checkbox"/> balance training<br/> <input type="checkbox"/> multicomponent physical training<br/> <input checked="" type="checkbox"/> mixed physical training</p> <p><b>COMPARISON:</b><br/>           mixed (i.e. usual care/group activities)</p>                                                                                                                                     | <p><input checked="" type="checkbox"/> Cognition<br/>           global cognition SMD<sup>+</sup> = 0.43, p = 0.08, 95 % CI [- 0.05 to 0.92], k = 9, n = 409 <input checked="" type="checkbox"/> sign. <input type="checkbox"/> n.s. very low</p> <p><input type="checkbox"/> Brain / Neurochemicals / HRV<br/>NR</p> <p><input checked="" type="checkbox"/> Physical Outcomes, Mobility, and Activities of Daily Living<br/>           ADL* SMD<sup>+</sup> = 0.68, p = 0.03, 95 % CI [0.08 to 1.27], k = 6, n = 289 <input checked="" type="checkbox"/> sign. <input type="checkbox"/> n.s. low</p> <p><input checked="" type="checkbox"/> Psychosocial Outcomes<br/>           depression SMD<sup>+</sup> = -0.14, p = 0.20, 95 % CI [-0.36 to 0.97], k = 5, n = 341 <input type="checkbox"/> sign. <input checked="" type="checkbox"/> n.s. moderate</p>                                                                                                                                                                                                                                                                                                                                            |
| <p>Groot et al. 2015 [36]</p>                 | <p><b>POPULATION:</b><br/> <input type="checkbox"/> healthy older adults<br/> <input checked="" type="checkbox"/> older adults with mNCD<br/> <input type="checkbox"/> older adults with Dementia</p> <p><b>INTERVENTION:</b><br/> <input checked="" type="checkbox"/> aerobic training<br/> <input checked="" type="checkbox"/> resistance training<br/> <input type="checkbox"/> balance training<br/> <input checked="" type="checkbox"/> multicomponent physical training<br/> <input checked="" type="checkbox"/> mixed physical training</p> <p><b>COMPARISON:</b><br/>           non-exposed control condition or a control condition that received another intervention</p>                                                     | <p><input checked="" type="checkbox"/> Cognition<br/>           pooled estimates<br/>           global cogn. (comb.execut.)** SMD<sup>+</sup> = 0.59, p &lt; 0.01, 95 % CI [0.32 to 0.86], k = 6, n = 225 NR<br/>           global cogn. (pooled)** SMD<sup>+</sup> = 0.42, p &lt; 0.01, 95 % CI [0.23 to 0.62], k = 16, n = 691 NR<br/>           global cogn. (aerobic)** SMD<sup>+</sup> = 0.41, p &lt; 0.01, 95 % CI [0.05 to 0.76], k = 6, n = 320 NR<br/>           global cogn. (resistance) SMD<sup>+</sup> = - 0.10, p &gt; 0.05, 95 % CI [- 0.38 to 0.19], k = 4, n = 191 NR<br/>           ADAS-cog (pooled)** SMD<sup>+</sup> = 0.38, p &lt; 0.01, 95 % CI [0.09 to 0.66], k = 6, n = 210 NR<br/>           Dementia<br/>           global cogn. (pooled)** SMD<sup>+</sup> = 0.47, p &lt; 0.01, 95 % CI [0.14 to 0.80], k = 6, n = 248 NR</p> <p><input type="checkbox"/> Brain / Neurochemicals / HRV<br/>NR</p> <p><input checked="" type="checkbox"/> Physical Outcomes, Mobility, and Activities of Daily Living<br/>           ADL (pooled)** SMD<sup>+</sup> = 1.18, p &lt; 0.01, 95 % CI [0.57 to 1.79], k = 4 NR</p> <p><input type="checkbox"/> Psychosocial Outcomes<br/>NR</p> |
| <p>Ströhle et al. 2015 [37]</p>               | <p><b>POPULATION:</b><br/> <input type="checkbox"/> healthy older adults<br/> <input checked="" type="checkbox"/> older adults with mNCD<br/> <input type="checkbox"/> older adults with Dementia</p> <p><b>INTERVENTION:</b><br/> <input type="checkbox"/> aerobic training<br/> <input type="checkbox"/> resistance training<br/> <input type="checkbox"/> balance training<br/> <input type="checkbox"/> multicomponent physical training<br/> <input checked="" type="checkbox"/> mixed physical training</p> <p><b>COMPARISON:</b><br/>           non-exposed control condition or a control condition that received another intervention</p>                                                                                      | <p><input checked="" type="checkbox"/> Cognition<br/>           mNCD<br/>           global cognition* SMCR<sup>+</sup> = 0.20, p &lt; 0.05, 95 % CI [0.59 to 1.07], k = 6, n = 451 <input checked="" type="checkbox"/> sign. <input type="checkbox"/> n.s.<br/>           ADAS-cog* SMCR<sup>+</sup> = 0.83, p &lt; 0.05, 95 % CI [0.11 to 0.28], k = 4, n = 119 <input checked="" type="checkbox"/> sign. <input type="checkbox"/> n.s.</p> <p><input type="checkbox"/> Brain / Neurochemicals / HRV<br/>NR</p> <p><input type="checkbox"/> Physical Outcomes, Mobility, and Activities of Daily Living<br/>NR</p> <p><input type="checkbox"/> Psychosocial Outcomes<br/>NR</p>                                                                                                                                                                                                                                                                                                                                                                                                                                                                                                                       |

Table S3: Summary of meta-analytic results for simultaneous cognitive-motor training interventions

color-coding: black = significant effect, grey = no significant effect

\* = significant at  $p \leq 0.05$ , \*\* = significant at  $p \leq 0.01$

Abbreviations: ADL = Activities of Daily Living, BBS = Berg Balance Scale, COP = centre of pressure, FAS = F-A-S test, g = Hedge's g, GRADE = Grading of Recommendations Assessment, Development and Evaluation, IADL = Instrumented Activities of Daily Living, HOA = healthy older adults, k = number of studies; mNCD = mild neurocognitive disorder, n = number of participants; SMD = standardized mean difference, TMT-A = Trail Making Test Part 1, TMT-B = Trail Making Test Part B, TUG = Timed Up and Go, VFT = Verbal Fluency test

| Reference                           | Study Characteristics                                                                                                                                                                                                                                                                                                                                                                                                                                                                                                                                                                                                                                                                                                                                                                                   | Outcomes                                                                                        |                                                                                          |                                                                         |       |
|-------------------------------------|---------------------------------------------------------------------------------------------------------------------------------------------------------------------------------------------------------------------------------------------------------------------------------------------------------------------------------------------------------------------------------------------------------------------------------------------------------------------------------------------------------------------------------------------------------------------------------------------------------------------------------------------------------------------------------------------------------------------------------------------------------------------------------------------------------|-------------------------------------------------------------------------------------------------|------------------------------------------------------------------------------------------|-------------------------------------------------------------------------|-------|
|                                     |                                                                                                                                                                                                                                                                                                                                                                                                                                                                                                                                                                                                                                                                                                                                                                                                         | Type                                                                                            | Statistics                                                                               | Heterogeneity                                                           | GRADE |
| Corregidor-Sánchez et al. 2021 [38] | <b>POPULATION:</b><br><input checked="" type="checkbox"/> healthy older adults<br><input type="checkbox"/> older adults with mNCD<br><input type="checkbox"/> older adults with Dementia<br><br><b>INTERVENTION:</b><br><input type="checkbox"/> sequential motor-cognitive<br><input type="checkbox"/> coupled motor-cognitive<br><input checked="" type="checkbox"/> exergame/VR/active videogame<br><input checked="" type="checkbox"/> mixed cognitive-motor int.<br><br><b>COMPARISON:</b><br>active (i.e. physical training (six studies) and health education (three studies))                                                                                                                                                                                                                   | <input type="checkbox"/> Cognition                                                              |                                                                                          |                                                                         |       |
|                                     |                                                                                                                                                                                                                                                                                                                                                                                                                                                                                                                                                                                                                                                                                                                                                                                                         | <input type="checkbox"/> Brain / Neurochemicals / HRV                                           |                                                                                          |                                                                         |       |
|                                     |                                                                                                                                                                                                                                                                                                                                                                                                                                                                                                                                                                                                                                                                                                                                                                                                         | NR                                                                                              |                                                                                          |                                                                         |       |
|                                     |                                                                                                                                                                                                                                                                                                                                                                                                                                                                                                                                                                                                                                                                                                                                                                                                         | <input checked="" type="checkbox"/> Physical Outcomes, Mobility, and Activities of Daily Living |                                                                                          |                                                                         |       |
|                                     |                                                                                                                                                                                                                                                                                                                                                                                                                                                                                                                                                                                                                                                                                                                                                                                                         | ADL                                                                                             | SMD <sup>+</sup> = 0.61, $p = 0.11$ , 95 % CI [-0.15 to 1.37], k = 7, n = 192            | <input checked="" type="checkbox"/> sign. <input type="checkbox"/> n.s. |       |
|                                     |                                                                                                                                                                                                                                                                                                                                                                                                                                                                                                                                                                                                                                                                                                                                                                                                         | IADL                                                                                            | SMD <sup>+</sup> = - 0.34, $p = 0.17$ , 95 % CI [- 0.82 to 0.15], k = 3, n = 67          | <input type="checkbox"/> sign. <input checked="" type="checkbox"/> n.s. |       |
|                                     |                                                                                                                                                                                                                                                                                                                                                                                                                                                                                                                                                                                                                                                                                                                                                                                                         | transfer                                                                                        | SMD <sup>-</sup> = - 0.23, $p = 0.35$ , 95 % CI [- 0.71 to 0.25], k = 6, n = 88          | <input type="checkbox"/> sign. <input checked="" type="checkbox"/> n.s. |       |
|                                     |                                                                                                                                                                                                                                                                                                                                                                                                                                                                                                                                                                                                                                                                                                                                                                                                         | ambulation**                                                                                    | SMD <sup>-</sup> = - 0.63, $p < 0.00001$ , 95 % CI [- 0.86 to - 0.40], k = 32, n = 1,315 | <input checked="" type="checkbox"/> sign. <input type="checkbox"/> n.s. |       |
|                                     |                                                                                                                                                                                                                                                                                                                                                                                                                                                                                                                                                                                                                                                                                                                                                                                                         | <input type="checkbox"/> Psychosocial Outcomes                                                  |                                                                                          |                                                                         |       |
|                                     |                                                                                                                                                                                                                                                                                                                                                                                                                                                                                                                                                                                                                                                                                                                                                                                                         | NR                                                                                              |                                                                                          |                                                                         |       |
| Gavelin et al. 2021 [39]            | <b>POPULATION:</b><br><input checked="" type="checkbox"/> healthy older adults<br><input checked="" type="checkbox"/> older adults with mNCD<br><input type="checkbox"/> older adults with Dementia<br><br><b>INTERVENTION:</b><br><input checked="" type="checkbox"/> sequential motor-cognitive<br><input checked="" type="checkbox"/> coupled motor-cognitive<br><input checked="" type="checkbox"/> exergame/VR/active videogame<br><input checked="" type="checkbox"/> mixed cognitive-motor int.<br><br><b>COMPARISON:</b><br>active (i.e. combined intervention with physical training, cognitive training, a sham intervention (e.g. health education, relaxation, stretching or non-specific cognitive activities such as data entry on a computer)), or passive (i.e. wait-list, no-contact). | <input checked="" type="checkbox"/> Cognition                                                   |                                                                                          |                                                                         |       |
|                                     |                                                                                                                                                                                                                                                                                                                                                                                                                                                                                                                                                                                                                                                                                                                                                                                                         | pooled estimates:                                                                               |                                                                                          |                                                                         |       |
|                                     |                                                                                                                                                                                                                                                                                                                                                                                                                                                                                                                                                                                                                                                                                                                                                                                                         | global cognition*                                                                               | $g^+ = 0.30$ , $p < 0.05$ , 95 % CI [0.06 to 0.53], k = 41                               |                                                                         | NR    |
|                                     |                                                                                                                                                                                                                                                                                                                                                                                                                                                                                                                                                                                                                                                                                                                                                                                                         | short-term memory*                                                                              | $g^+ = 0.30$ , $p < 0.05$ , 95 % CI [0.05 to 0.55], k = 21                               |                                                                         | NR    |
|                                     |                                                                                                                                                                                                                                                                                                                                                                                                                                                                                                                                                                                                                                                                                                                                                                                                         | fluid reasoning*                                                                                | $g^+ = 0.24$ , $p < 0.05$ , 95 % CI [0.02 to 0.46], k = 7                                |                                                                         | NR    |
|                                     |                                                                                                                                                                                                                                                                                                                                                                                                                                                                                                                                                                                                                                                                                                                                                                                                         | executive function*                                                                             | $g^+ = 0.22$ , $p < 0.05$ , 95 % CI [0.13 to 0.30], k = 27                               |                                                                         | NR    |
|                                     |                                                                                                                                                                                                                                                                                                                                                                                                                                                                                                                                                                                                                                                                                                                                                                                                         | overall effect*                                                                                 | $g^+ = 0.22$ , $p < 0.05$ , 95 % CI [0.14 to 0.30], k = 41                               | <input type="checkbox"/> sign. <input checked="" type="checkbox"/> n.s. |       |
|                                     |                                                                                                                                                                                                                                                                                                                                                                                                                                                                                                                                                                                                                                                                                                                                                                                                         | processing speed*                                                                               | $g^+ = 0.17$ , $p < 0.05$ , 95 % CI [0.07 to 0.27], k = 22                               |                                                                         | NR    |
|                                     |                                                                                                                                                                                                                                                                                                                                                                                                                                                                                                                                                                                                                                                                                                                                                                                                         | visual processing                                                                               | $g^+ = 0.11$ , $p > 0.05$ , 95 % CI [- 0.18 to 0.40], k = 6                              |                                                                         | NR    |
|                                     |                                                                                                                                                                                                                                                                                                                                                                                                                                                                                                                                                                                                                                                                                                                                                                                                         | HOA:                                                                                            |                                                                                          |                                                                         |       |
|                                     |                                                                                                                                                                                                                                                                                                                                                                                                                                                                                                                                                                                                                                                                                                                                                                                                         | overall effect**                                                                                | $g^+ = 0.20$ , $p < 0.001$ , 95 % CI [0.12 to 0.29], k = 28                              |                                                                         | NR    |
|                                     |                                                                                                                                                                                                                                                                                                                                                                                                                                                                                                                                                                                                                                                                                                                                                                                                         | mNCD:                                                                                           |                                                                                          |                                                                         |       |
|                                     |                                                                                                                                                                                                                                                                                                                                                                                                                                                                                                                                                                                                                                                                                                                                                                                                         | overall effect*                                                                                 | $g^+ = 0.26$ , $p = 0.02$ , 95 % CI [0.06 to 0.46], k = 13                               |                                                                         | NR    |
|                                     |                                                                                                                                                                                                                                                                                                                                                                                                                                                                                                                                                                                                                                                                                                                                                                                                         | <input type="checkbox"/> Brain / Neurochemicals / HRV                                           |                                                                                          |                                                                         |       |
|                                     |                                                                                                                                                                                                                                                                                                                                                                                                                                                                                                                                                                                                                                                                                                                                                                                                         | NR                                                                                              |                                                                                          |                                                                         |       |
|                                     |                                                                                                                                                                                                                                                                                                                                                                                                                                                                                                                                                                                                                                                                                                                                                                                                         | <input checked="" type="checkbox"/> Physical Outcomes, Mobility, and Activities of Daily Living |                                                                                          |                                                                         |       |
|                                     |                                                                                                                                                                                                                                                                                                                                                                                                                                                                                                                                                                                                                                                                                                                                                                                                         | pooled estimates:                                                                               |                                                                                          |                                                                         |       |
|                                     |                                                                                                                                                                                                                                                                                                                                                                                                                                                                                                                                                                                                                                                                                                                                                                                                         | functional mobility*                                                                            | $g^+ = 0.34$ , $p < 0.05$ , 95 % CI [0.16 to 0.52], k = 22                               |                                                                         | NR    |
|                                     |                                                                                                                                                                                                                                                                                                                                                                                                                                                                                                                                                                                                                                                                                                                                                                                                         | overall effect*                                                                                 | $g^+ = 0.25$ , $p < 0.05$ , 95 % CI [0.13 to 0.37], k = 32                               | <input type="checkbox"/> sign. <input checked="" type="checkbox"/> n.s. |       |
|                                     |                                                                                                                                                                                                                                                                                                                                                                                                                                                                                                                                                                                                                                                                                                                                                                                                         | balance                                                                                         | $g^+ = 0.23$ , $p > 0.05$ , 95 % CI [-0.04 to 0.49], k = 12                              |                                                                         | NR    |
|                                     |                                                                                                                                                                                                                                                                                                                                                                                                                                                                                                                                                                                                                                                                                                                                                                                                         | cognitive-motor ability                                                                         | $g^+ = 0.19$ , $p > 0.05$ , 95 % CI [-0.01 to 0.39], k = 14                              |                                                                         | NR    |
|                                     |                                                                                                                                                                                                                                                                                                                                                                                                                                                                                                                                                                                                                                                                                                                                                                                                         | strength                                                                                        | $g^+ = 0.17$ , $p > 0.05$ , 95 % CI [-0.10 to 0.44], k = 9                               |                                                                         | NR    |
|                                     |                                                                                                                                                                                                                                                                                                                                                                                                                                                                                                                                                                                                                                                                                                                                                                                                         | aerobic capacity                                                                                | $g^+ = 0.10$ , $p > 0.05$ , 95 % CI [-0.06 to 0.26], k = 14                              |                                                                         | NR    |
|                                     |                                                                                                                                                                                                                                                                                                                                                                                                                                                                                                                                                                                                                                                                                                                                                                                                         | gait                                                                                            | $g^+ = 0.06$ , $p > 0.5$ , 95 % CI [-0.23 to 0.34], k = 10                               |                                                                         | NR    |
|                                     |                                                                                                                                                                                                                                                                                                                                                                                                                                                                                                                                                                                                                                                                                                                                                                                                         | HOA:                                                                                            |                                                                                          |                                                                         |       |
|                                     |                                                                                                                                                                                                                                                                                                                                                                                                                                                                                                                                                                                                                                                                                                                                                                                                         | overall effect**                                                                                | $g^+ = 0.23$ , $p = 0.005$ , 95 % CI [0.08 to 0.38], k = 24                              |                                                                         | NR    |
|                                     |                                                                                                                                                                                                                                                                                                                                                                                                                                                                                                                                                                                                                                                                                                                                                                                                         | mNCD:                                                                                           |                                                                                          |                                                                         |       |
|                                     |                                                                                                                                                                                                                                                                                                                                                                                                                                                                                                                                                                                                                                                                                                                                                                                                         | overall effect**                                                                                | $g^+ = 0.32$ , $p = 0.008$ , 95 % CI [0.12 to 0.52], k = 8                               |                                                                         | NR    |
|                                     |                                                                                                                                                                                                                                                                                                                                                                                                                                                                                                                                                                                                                                                                                                                                                                                                         | <input checked="" type="checkbox"/> Psychosocial Outcomes                                       |                                                                                          |                                                                         |       |
|                                     |                                                                                                                                                                                                                                                                                                                                                                                                                                                                                                                                                                                                                                                                                                                                                                                                         | pooled estimates:                                                                               |                                                                                          |                                                                         |       |
|                                     |                                                                                                                                                                                                                                                                                                                                                                                                                                                                                                                                                                                                                                                                                                                                                                                                         | overall effect*                                                                                 | $g^+ = 0.10$ , $p < 0.05$ , 95 % CI [0.01 to 0.20], k = 8                                | <input type="checkbox"/> sign. <input checked="" type="checkbox"/> n.s. |       |

|                              |                                                                                                                                                                                                                                                                                                                                                                                                                                                                                                                                                                                                                                                                                    |                                                                                                                                                                                                                                                                                                                                                                                                                                                                                                                                                                                                                                                                                                                                                                                                                                                                                                                                                                                                                                                                                                                                                                                                                                                                                                                                                                                                                                                                                                                                                                                                                               |
|------------------------------|------------------------------------------------------------------------------------------------------------------------------------------------------------------------------------------------------------------------------------------------------------------------------------------------------------------------------------------------------------------------------------------------------------------------------------------------------------------------------------------------------------------------------------------------------------------------------------------------------------------------------------------------------------------------------------|-------------------------------------------------------------------------------------------------------------------------------------------------------------------------------------------------------------------------------------------------------------------------------------------------------------------------------------------------------------------------------------------------------------------------------------------------------------------------------------------------------------------------------------------------------------------------------------------------------------------------------------------------------------------------------------------------------------------------------------------------------------------------------------------------------------------------------------------------------------------------------------------------------------------------------------------------------------------------------------------------------------------------------------------------------------------------------------------------------------------------------------------------------------------------------------------------------------------------------------------------------------------------------------------------------------------------------------------------------------------------------------------------------------------------------------------------------------------------------------------------------------------------------------------------------------------------------------------------------------------------------|
| Biazus-Sehn et al. 2020 [19] | <p><b>POPULATION:</b></p> <p><input type="checkbox"/> healthy older adults</p> <p><input checked="" type="checkbox"/> older adults with mNCD</p> <p><input type="checkbox"/> older adults with Dementia</p> <p><b>INTERVENTION:</b></p> <p><input type="checkbox"/> sequential motor-cognitive</p> <p><input checked="" type="checkbox"/> coupled motor-cognitive</p> <p><input type="checkbox"/> exergame/VR/active videogame</p> <p><input type="checkbox"/> mixed cognitive-motor int.</p> <p><b>COMPARISON:</b></p> <p>mixed (i.e. no treatment; balance, tone or stretching programs; or social and/or mental activities)</p>                                                 | <p><input checked="" type="checkbox"/> Cognition</p> <p>delayed recall** SMD<sup>+</sup> = 0.593, p &lt; 0.001, 95 % CI [0.269 to 0.917] NR</p> <p>global cognition** SMD<sup>+</sup> = 0.531, p = 0.003, 95 % CI [0.172 to 0.529] NR</p> <p>executive function* SMD<sup>+</sup> = 0.499, p = 0.015, 95 % CI [0.093 to 0.905] NR</p> <p><input type="checkbox"/> Brain / Neurochemicals / HRV</p> <p>NR</p> <p><input type="checkbox"/> Physical Outcomes, Mobility, and Activities of Daily Living</p> <p>NR</p> <p><input type="checkbox"/> Psychosocial Outcomes</p> <p>NR</p>                                                                                                                                                                                                                                                                                                                                                                                                                                                                                                                                                                                                                                                                                                                                                                                                                                                                                                                                                                                                                                             |
| Chan et al. 2020 [40]        | <p><b>POPULATION:</b></p> <p><input type="checkbox"/> healthy older adults</p> <p><input checked="" type="checkbox"/> older adults with mNCD</p> <p><input type="checkbox"/> older adults with Dementia</p> <p><b>INTERVENTION:</b></p> <p><input type="checkbox"/> sequential motor-cognitive</p> <p><input checked="" type="checkbox"/> coupled motor-cognitive</p> <p><input type="checkbox"/> exergame/VR/active videogame</p> <p><input type="checkbox"/> mixed cognitive-motor int.</p> <p><b>COMPARISON:</b></p> <p>mixed (i.e. waitlist control group, health education)</p>                                                                                               | <p><input checked="" type="checkbox"/> Cognition</p> <p>immediate recall** SMD<sup>+</sup> = 0.54, p &lt; 0.001, 95 % CI [0.38 to 0.71], k = 4 <input type="checkbox"/> sign. <input checked="" type="checkbox"/> n.s.</p> <p>global cognition** SMD<sup>+</sup> = 0.48, p &lt; 0.001, 95 % CI [0.21 to 0.74], k = 4 <input type="checkbox"/> sign. <input checked="" type="checkbox"/> n.s.</p> <p>attention** SMD<sup>+</sup> = 0.33, p &lt; 0.01, 95 % CI [0.12 to 0.54], k = 4 <input type="checkbox"/> sign. <input checked="" type="checkbox"/> n.s.</p> <p>delayed recall* SMD<sup>+</sup> = 0.33, p &lt; 0.05, 95 % CI [0.01 to 0.64], k = 3 <input checked="" type="checkbox"/> sign. <input type="checkbox"/> n.s.</p> <p>visuospatial skills* SMD<sup>+</sup> = 0.16, p &lt; 0.05, 95 % CI [0.01 to 0.32], k = 4 <input type="checkbox"/> sign. <input checked="" type="checkbox"/> n.s.</p> <p>language SMD<sup>+</sup> = 0.37, p &gt; 0.05, 95 % CI [- 0.16 to 0.91], k = 2 <input type="checkbox"/> sign. <input checked="" type="checkbox"/> n.s.</p> <p>mental flexibility SMD<sup>+</sup> = 0.18, p &gt; 0.05, 95 % CI [- 0.13 to 0.49], k = 4 <input checked="" type="checkbox"/> sign. <input type="checkbox"/> n.s.</p> <p>working memory SMD<sup>+</sup> = 0.11, p &gt; 0.05, 95 % CI [- 0.18 to 0.40], k = 3 <input type="checkbox"/> sign. <input checked="" type="checkbox"/> n.s.</p> <p><input type="checkbox"/> Brain / Neurochemicals / HRV</p> <p><input type="checkbox"/> Physical Outcomes, Mobility, and Activities of Daily Living</p> <p><input type="checkbox"/> Psychosocial Outcomes</p> |
| Chen et al. 2020 [20]        | <p><b>POPULATION:</b></p> <p><input checked="" type="checkbox"/> healthy older adults</p> <p><input checked="" type="checkbox"/> older adults with mNCD</p> <p><input type="checkbox"/> older adults with Dementia</p> <p><b>INTERVENTION:</b></p> <p><input type="checkbox"/> sequential motor-cognitive</p> <p><input checked="" type="checkbox"/> coupled motor-cognitive</p> <p><input type="checkbox"/> exergame/VR/active videogame</p> <p><input checked="" type="checkbox"/> mixed cognitive-motor int.</p> <p><b>COMPARISON:</b></p> <p>mixed (no contact, no treatment, waiting list, sham training, and alternative active treatments for the comparison condition)</p> | <p><input checked="" type="checkbox"/> Cognition</p> <p>pooled older adults:</p> <p>overall effect (coupled)* g<sup>+</sup> = 0.44, p &lt; 0.05, 95 % CI [0.29 to 0.60], k = 10 NR</p> <p><input type="checkbox"/> Brain / Neurochemicals / HRV</p> <p><input type="checkbox"/> Physical Outcomes, Mobility, and Activities of Daily Living</p> <p><input type="checkbox"/> Psychosocial Outcomes</p>                                                                                                                                                                                                                                                                                                                                                                                                                                                                                                                                                                                                                                                                                                                                                                                                                                                                                                                                                                                                                                                                                                                                                                                                                         |
| Mansor et al. 2020 [3]       | <p><b>POPULATION:</b></p> <p><input checked="" type="checkbox"/> healthy older adults</p> <p><input type="checkbox"/> older adults with mNCD</p> <p><input type="checkbox"/> older adults with Dementia</p> <p><b>INTERVENTION:</b></p> <p><input type="checkbox"/> sequential motor-cognitive</p> <p><input type="checkbox"/> coupled motor-cognitive</p> <p><input type="checkbox"/> exergame/VR/active videogame</p> <p><input checked="" type="checkbox"/> mixed cognitive-motor int.</p> <p><b>COMPARISON:</b></p> <p>mixed (passive (i.e. no-contact; k = 24) or active (e.g. watched a movie or a documentary, read a book, completed quizzes, or exercised; k = 9))</p>    | <p><input checked="" type="checkbox"/> Cognition</p> <p>updating memory* g<sup>+</sup> = 0.37, p = 0.02, 95 % CI [0.07 to 0.66], k = 23, n = 879 <input checked="" type="checkbox"/> sign. <input type="checkbox"/> n.s.</p> <p>inhibition* g<sup>+</sup> = 0.28, p = 0.02, 95 % CI [0.02 to 0.53], k = 20, n = 709 <input checked="" type="checkbox"/> sign. <input type="checkbox"/> n.s.</p> <p>processing speed g<sup>+</sup> = 0.15, p = 0.20, 95 % CI [- 0.08 to 0.38], k = 21, n = 800 <input checked="" type="checkbox"/> sign. <input type="checkbox"/> n.s.</p> <p>attention g<sup>+</sup> = 0.08, p = 0.77, 95 % CI [- 0.47 to 0.64], k = 11, n = 394 <input checked="" type="checkbox"/> sign. <input type="checkbox"/> n.s.</p> <p>delayed memory g<sup>+</sup> = -0.03, p = 0.90, 95 % CI [- 0.48 to 0.42], k = 10, n = 387 <input checked="" type="checkbox"/> sign. <input type="checkbox"/> n.s.</p> <p>reasoning g<sup>+</sup> = 0.17, p = 0.45, 95 % CI [- 0.28 to 0.62], k = 13, n = 523 <input checked="" type="checkbox"/> sign. <input type="checkbox"/> n.s.</p> <p>shifting g<sup>+</sup> = 0.14, p = 0.46, 95 % CI [- 0.21 to 0.50], k = 18, n = 693 <input checked="" type="checkbox"/> sign. <input type="checkbox"/> n.s.</p> <p><input type="checkbox"/> Brain / Neurochemicals / HRV</p> <p>NR</p> <p><input type="checkbox"/> Physical Outcomes, Mobility, and Activities of Daily Living</p> <p>NR</p> <p><input type="checkbox"/> Psychosocial Outcomes</p> <p>NR</p>                                                                                                                       |
|                              |                                                                                                                                                                                                                                                                                                                                                                                                                                                                                                                                                                                                                                                                                    |                                                                                                                                                                                                                                                                                                                                                                                                                                                                                                                                                                                                                                                                                                                                                                                                                                                                                                                                                                                                                                                                                                                                                                                                                                                                                                                                                                                                                                                                                                                                                                                                                               |

|                             |                                                                                                                                                                                                         |                                                                                                                                                                                                                                                                                                                                                                                                                                                                                                                                                                                                                                                                                                                                                                                                                                                                                                                                                                                                                                                                                                                                                                                                                                                                                                                                                                                                                                                                                                                                                                                                                                                                                                                                                                                                                                                                                                                                                                                                                                                                                                                                                                                                                                                                                                                                                                                                                                                                                                                                                                                                                                                                                                                                                                                                                                                                                                                                                                                                                                                                                                                                                                                                                                                                                                                                                                                                                                                                                                                                                                                                                                                                                                                                          |
|-----------------------------|---------------------------------------------------------------------------------------------------------------------------------------------------------------------------------------------------------|------------------------------------------------------------------------------------------------------------------------------------------------------------------------------------------------------------------------------------------------------------------------------------------------------------------------------------------------------------------------------------------------------------------------------------------------------------------------------------------------------------------------------------------------------------------------------------------------------------------------------------------------------------------------------------------------------------------------------------------------------------------------------------------------------------------------------------------------------------------------------------------------------------------------------------------------------------------------------------------------------------------------------------------------------------------------------------------------------------------------------------------------------------------------------------------------------------------------------------------------------------------------------------------------------------------------------------------------------------------------------------------------------------------------------------------------------------------------------------------------------------------------------------------------------------------------------------------------------------------------------------------------------------------------------------------------------------------------------------------------------------------------------------------------------------------------------------------------------------------------------------------------------------------------------------------------------------------------------------------------------------------------------------------------------------------------------------------------------------------------------------------------------------------------------------------------------------------------------------------------------------------------------------------------------------------------------------------------------------------------------------------------------------------------------------------------------------------------------------------------------------------------------------------------------------------------------------------------------------------------------------------------------------------------------------------------------------------------------------------------------------------------------------------------------------------------------------------------------------------------------------------------------------------------------------------------------------------------------------------------------------------------------------------------------------------------------------------------------------------------------------------------------------------------------------------------------------------------------------------------------------------------------------------------------------------------------------------------------------------------------------------------------------------------------------------------------------------------------------------------------------------------------------------------------------------------------------------------------------------------------------------------------------------------------------------------------------------------------------------|
| Pacheco et al.<br>2020 [41] | <p><b>POPULATION:</b></p> <input checked="" type="checkbox"/> healthy older adults<br><input type="checkbox"/> older adults with mNCD<br><input type="checkbox"/> older adults with Dementia            | <p><input type="checkbox"/> Cognition</p> <p>NR</p> <p><input type="checkbox"/> Brain / Neurochemicals / HRV</p> <p>NR</p> <p><input checked="" type="checkbox"/> Physical Outcomes, Mobility, and Activities of Daily Living</p> <p>balance (BBS)** MD<sup>+</sup> = 2.46, p = 0.0001, 95 % CI [0.49 to 4.44], k = 3, n = 102 <input checked="" type="checkbox"/> sign. <input type="checkbox"/> n.s.<br/> balance (COP sway)** SMD<sup>+</sup> = -0.93, p = 0.0001, 95 % CI [- 1.52 to - 0.34], k = 4, n = 124 <input checked="" type="checkbox"/> sign. <input type="checkbox"/> n.s.<br/> mobility (TUG)** MD<sup>+</sup> = -2.48, p = 0.0001, 95 % CI [- 3.83 to - 1.12], k = 3, n = 103 <input type="checkbox"/> sign. <input checked="" type="checkbox"/> n.s.</p> <p><input type="checkbox"/> Psychosocial Outcomes</p> <p>NR</p>                                                                                                                                                                                                                                                                                                                                                                                                                                                                                                                                                                                                                                                                                                                                                                                                                                                                                                                                                                                                                                                                                                                                                                                                                                                                                                                                                                                                                                                                                                                                                                                                                                                                                                                                                                                                                                                                                                                                                                                                                                                                                                                                                                                                                                                                                                                                                                                                                                                                                                                                                                                                                                                                                                                                                                                                                                                                                                |
| Zhu et al.<br>2020 [42]     | <p><b>POPULATION:</b></p> <input checked="" type="checkbox"/> healthy older adults<br><input type="checkbox"/> older adults with mNCD<br><input type="checkbox"/> older adults with Dementia            | <p><input checked="" type="checkbox"/> Cognition</p> <p>global cognition** MD<sup>+</sup> = 1.43, p = 0.0009, 95 % CI [0.59 to 2.27], k = 3, n = 524 <input type="checkbox"/> sign. <input checked="" type="checkbox"/> n.s.<br/> verbal fluency (FAS)** MD<sup>+</sup> = 1.73, p = 0.003, 95 % CI [0.58 to 2.88], k = 1, n = 129 not applicable<br/> delayed recall** MD<sup>+</sup> = 0.46, p &lt; 0.00001, 95 % CI [0.30 to 0.62], k = 5, n = 647 <input type="checkbox"/> sign. <input checked="" type="checkbox"/> n.s.<br/> immediate recall* MD<sup>+</sup> = 0.24, p = 0.04, 95 % CI [0.01 to 0.46], k = 4, n = 513 <input type="checkbox"/> sign. <input checked="" type="checkbox"/> n.s.<br/> verbal fluency (VFT) MD<sup>+</sup> = 0.22, p = 0.9, 95 % CI [- 3.43 to 3.88], k = 2, n = 324 <input checked="" type="checkbox"/> sign. <input type="checkbox"/> n.s.</p> <p><input type="checkbox"/> Brain / Neurochemicals / HRV</p> <p>NR</p> <p><input type="checkbox"/> Physical Outcomes, Mobility, and Activities of Daily Living</p> <p>NR</p> <p><input type="checkbox"/> Psychosocial Outcomes</p> <p>NR</p>                                                                                                                                                                                                                                                                                                                                                                                                                                                                                                                                                                                                                                                                                                                                                                                                                                                                                                                                                                                                                                                                                                                                                                                                                                                                                                                                                                                                                                                                                                                                                                                                                                                                                                                                                                                                                                                                                                                                                                                                                                                                                                                                                                                                                                                                                                                                                                                                                                                                                                                                                                                                          |
| Wang et al.<br>2019 [27]    | <p><b>POPULATION:</b></p> <input type="checkbox"/> healthy older adults<br><input checked="" type="checkbox"/> older adults with mNCD<br><input type="checkbox"/> older adults with Dementia            | <p><input checked="" type="checkbox"/> Cognition</p> <p>global cogn. (combined)** SMD<sup>+</sup> = 0.41, p &lt; 0.001, 95 % CI [0.20 to 0.62], k = 7, n = 732 <input type="checkbox"/> sign. <input checked="" type="checkbox"/> n.s.<br/> global cogn. (exergame) SMD<sup>+</sup> = 0.57, p = 0.21, 95 % CI [-0.32 to 1.47], k = 1, n = 20 N/A</p> <p><input type="checkbox"/> Brain / Neurochemicals / HRV</p> <p><input type="checkbox"/> Physical Outcomes, Mobility, and Activities of Daily Living</p> <p><input type="checkbox"/> Psychosocial Outcomes</p>                                                                                                                                                                                                                                                                                                                                                                                                                                                                                                                                                                                                                                                                                                                                                                                                                                                                                                                                                                                                                                                                                                                                                                                                                                                                                                                                                                                                                                                                                                                                                                                                                                                                                                                                                                                                                                                                                                                                                                                                                                                                                                                                                                                                                                                                                                                                                                                                                                                                                                                                                                                                                                                                                                                                                                                                                                                                                                                                                                                                                                                                                                                                                                      |
| Wu et al. 2019<br>[43]      | <p><b>POPULATION:</b></p> <input checked="" type="checkbox"/> healthy older adults<br><input checked="" type="checkbox"/> older adults with mNCD<br><input type="checkbox"/> older adults with Dementia | <p><input checked="" type="checkbox"/> Cognition</p> <p>pooled estimates:</p> <p>global cogn. (dance)* MD<sup>+</sup> = 1.12, p = 0.02, 95 % CI [0.16 to 2.08], k = 2, n = 263 <input type="checkbox"/> sign. <input checked="" type="checkbox"/> n.s.<br/> global cogn. (tai chi)* MD<sup>+</sup> = 0.97, p = 0.02, 95 % CI [0.19 to 1.76], k = 10, n = 1,604 <input checked="" type="checkbox"/> sign. <input type="checkbox"/> n.s.<br/> global cogn. (pooled)** MD<sup>+</sup> = 0.92, p = 0.002, 95 % CI [0.33 to 1.51], k = 13, n = 1,892 <input checked="" type="checkbox"/> sign. <input type="checkbox"/> n.s.<br/> languagefluency (dance)** MD<sup>+</sup> = 0.61, p &lt; 0.001, 95 % CI [0.09 to 0.45], k = 1, n = 129 N/A<br/> work. memory (tai chi) MD<sup>+</sup> = 0.46, p = 0.06, 95 % CI [- 0.03 to 0.94], k = 6, n = 837 <input checked="" type="checkbox"/> sign. <input type="checkbox"/> n.s.<br/> work. memory (dance) MD<sup>+</sup> = 0.41, p = 0.18, 95 % CI [- 0.19 to 1.00], k = 2, n = 92 <input type="checkbox"/> sign. <input checked="" type="checkbox"/> n.s.<br/> memory (dance)* MD<sup>+</sup> = 0.35, p = 0.003, 95 % CI [0.12 to 0.58], k = 3, n = 285 <input type="checkbox"/> sign. <input checked="" type="checkbox"/> n.s.<br/> work. memory (pooled)* MD<sup>+</sup> = 0.32, p = 0.05, 95 % CI [0.01 to 0.64], k = 10, n = 1,084 <input type="checkbox"/> sign. <input checked="" type="checkbox"/> n.s.<br/> languagefluency (pooled)* MD<sup>+</sup> = 0.27, p = 0.003, 95 % CI [0.09 to 0.45], k = 9, n = 1,166 <input type="checkbox"/> sign. <input checked="" type="checkbox"/> n.s.<br/> memory (pooled)** MD<sup>+</sup> = 0.24, p = 0.001, 95 % CI [0.10 to 0.39], k = 15, n = 1,593 <input checked="" type="checkbox"/> sign. <input type="checkbox"/> n.s.<br/> memory (tai chi)* MD<sup>+</sup> = 0.20, p = 0.005, 95 % CI [0.06 to 0.35], k = 7, n = 888 <input type="checkbox"/> sign. <input checked="" type="checkbox"/> n.s.<br/> languagefluency (tai chi)* MD<sup>+</sup> = 0.18, p = 0.05, 95 % CI [0.00 to 0.37], k = 6, n = 887 <input type="checkbox"/> sign. <input checked="" type="checkbox"/> n.s.<br/> proc. speed (dance) MD<sup>+</sup> = -0.69, p = 0.22, 95 % CI [- 1.78 to 0.41], k = 3, n = 222 <input type="checkbox"/> sign. <input checked="" type="checkbox"/> n.s.<br/> proc. speed (tai chi) MD<sup>+</sup> = -1.29, p = 0.74, 95 % CI [- 9.0 to 6.4], k = 4, n = 758 <input checked="" type="checkbox"/> sign. <input type="checkbox"/> n.s.<br/> proc. speed (pooled) MD<sup>+</sup> = -1.44, p = 0.39, 95 % CI [- 4.7 to 1.8], k = 9, n = 1,208 <input type="checkbox"/> sign. <input checked="" type="checkbox"/> n.s.<br/> cogn. flexibility (dance) MD<sup>+</sup> = -6.19, p = 0.38, 95 % CI [- 20.1 to 7.7], k = 3, n = 222 <input checked="" type="checkbox"/> sign. <input type="checkbox"/> n.s.<br/> cogn. flexibility (pooled)** MD<sup>+</sup> = -8.80, p = 0.007, 95 % CI [- 15.2 to - 2.4], k = 13, n = 1,423 <input checked="" type="checkbox"/> sign. <input type="checkbox"/> n.s.<br/> cogn. flexibility (tai chi) MD<sup>+</sup> = -9.06, p = 0.11, 95 % CI [- 20.0 to 1.9], k = 7, n = 894 <input checked="" type="checkbox"/> sign. <input type="checkbox"/> n.s.</p> <p>HOA:</p> <p>global cogn. (pooled) MD<sup>+</sup> = 0.57, p = 0.19, 95 % CI [- 0.28 to 1.41], k = 3, n = 705 <input checked="" type="checkbox"/> sign. <input type="checkbox"/> n.s.</p> <p>mNCD:</p> <p>global cogn. (pooled)** MD<sup>+</sup> = 1.04, p = 0.008, 95 % CI [0.27 to 1.80], k = 10, n = 1,187 <input checked="" type="checkbox"/> sign. <input type="checkbox"/> n.s.</p> <p><input type="checkbox"/> Brain / Neurochemicals / HRV</p> |

|                           |                                                                                                                                                                                                                                                                                                                                                                                                                                                                                                                                                                                                                                                                                                                                                                  |                                                                                                                                                                                                                                                                                                                                                                                                                                                                                                                                                                                                                                                                                                                                                                                                                                                                                                                                                                                                                                                                                                                                                                                                                                                                                                                                                                                                                                                                                                                                                                                                                                                                                                                                                                                                                                                                                                                    |
|---------------------------|------------------------------------------------------------------------------------------------------------------------------------------------------------------------------------------------------------------------------------------------------------------------------------------------------------------------------------------------------------------------------------------------------------------------------------------------------------------------------------------------------------------------------------------------------------------------------------------------------------------------------------------------------------------------------------------------------------------------------------------------------------------|--------------------------------------------------------------------------------------------------------------------------------------------------------------------------------------------------------------------------------------------------------------------------------------------------------------------------------------------------------------------------------------------------------------------------------------------------------------------------------------------------------------------------------------------------------------------------------------------------------------------------------------------------------------------------------------------------------------------------------------------------------------------------------------------------------------------------------------------------------------------------------------------------------------------------------------------------------------------------------------------------------------------------------------------------------------------------------------------------------------------------------------------------------------------------------------------------------------------------------------------------------------------------------------------------------------------------------------------------------------------------------------------------------------------------------------------------------------------------------------------------------------------------------------------------------------------------------------------------------------------------------------------------------------------------------------------------------------------------------------------------------------------------------------------------------------------------------------------------------------------------------------------------------------------|
|                           |                                                                                                                                                                                                                                                                                                                                                                                                                                                                                                                                                                                                                                                                                                                                                                  | <input type="checkbox"/> Physical Outcomes, Mobility, and Activities of Daily Living<br><br><input type="checkbox"/> Psychosocial Outcomes                                                                                                                                                                                                                                                                                                                                                                                                                                                                                                                                                                                                                                                                                                                                                                                                                                                                                                                                                                                                                                                                                                                                                                                                                                                                                                                                                                                                                                                                                                                                                                                                                                                                                                                                                                         |
| Vaportzis et al. 2019 [7] | <b>POPULATION:</b><br><input checked="" type="checkbox"/> healthy older adults<br><input type="checkbox"/> older adults with mNCD<br><input type="checkbox"/> older adults with Dementia<br><br><b>INTERVENTION:</b><br><input type="checkbox"/> sequential motor-cognitive<br><input type="checkbox"/> coupled motor-cognitive<br><input type="checkbox"/> exergame/VR/active videogame<br><input checked="" type="checkbox"/> mixed cognitive-motor int.<br><br><b>COMPARISON:</b><br>(1) active control intervention (e.g. stretching or balance classes)<br>(2) wait-list control<br>(3) passive control (no intervention)                                                                                                                                   | <input checked="" type="checkbox"/> Cognition<br>TMT B <sup>(1)</sup> SMD <sup>+</sup> = 0.16, p = 0.34, 95 % CI [-0.16 to 0.48], k = 2, n = 202<br>TMT A <sup>(1)</sup> SMD <sup>+</sup> = 0.10, p = 0.47, 95 % CI [-0.17 to 0.36], k = 4, n = 270<br>digit symb. substitution <sup>(1)</sup> SMD <sup>+</sup> = 0.07, p = 0.70, 95 % CI [-0.27 to 0.40], k = 2, n = 170<br><input type="checkbox"/> Brain / Neurochemicals / HRV<br><br><input type="checkbox"/> Physical Outcomes, Mobility, and Activities of Daily Living<br><br><input type="checkbox"/> Psychosocial Outcomes                                                                                                                                                                                                                                                                                                                                                                                                                                                                                                                                                                                                                                                                                                                                                                                                                                                                                                                                                                                                                                                                                                                                                                                                                                                                                                                               |
| Northey et al. 2018 [30]  | <b>POPULATION:</b><br><input checked="" type="checkbox"/> healthy older adults<br><input checked="" type="checkbox"/> older adults with mNCD<br><input type="checkbox"/> older adults with Dementia<br><br><b>INTERVENTION:</b><br><input type="checkbox"/> sequential motor-cognitive<br><input checked="" type="checkbox"/> coupled motor-cognitive<br><input type="checkbox"/> exergame/VR/active videogame<br><input type="checkbox"/> mixed cognitive-motor int.<br><br><b>COMPARISON:</b><br>mixed (i.e. (1) sham training or alternative active treatment, (2) attention control, (3) no contact)                                                                                                                                                         | <input checked="" type="checkbox"/> Cognition<br>overall (tai chi)** SMD <sup>+</sup> = 0.25, p < 0.01, 95 % CI [0.32 to 0.71], k = 47 NR<br><input type="checkbox"/> Brain / Neurochemicals / HRV<br><br><input type="checkbox"/> Physical Outcomes, Mobility, and Activities of Daily Living<br><br><input type="checkbox"/> Psychosocial Outcomes                                                                                                                                                                                                                                                                                                                                                                                                                                                                                                                                                                                                                                                                                                                                                                                                                                                                                                                                                                                                                                                                                                                                                                                                                                                                                                                                                                                                                                                                                                                                                               |
| Stanmore et al. 2017 [44] | <b>POPULATION:</b><br><input checked="" type="checkbox"/> healthy older adults<br><input checked="" type="checkbox"/> older adults with mNCD<br><input type="checkbox"/> older adults with Dementia<br><br><b>INTERVENTION:</b><br><input type="checkbox"/> sequential motor-cognitive<br><input checked="" type="checkbox"/> coupled motor-cognitive<br><input checked="" type="checkbox"/> exergame/VR/active videogame<br><input type="checkbox"/> mixed cognitive-motor int.<br><br><b>COMPARISON:</b><br>(1) physically active (e.g. aerobic training, balance, stretching, strenth training)<br>(2) cognitively active (e.g. health education sessions, reading, cognitive remediation, or memory training)<br>(3) passive (e.g. waitlist/usual treatment) | <input checked="" type="checkbox"/> Cognition<br>pooled estimates:<br>spat. learning / memory g <sup>+</sup> = 1.230, p = 0.264, 95 % CI [- 0.93 to 3.39], k = 3, n = 135<br>inhibitory control** g <sup>+</sup> = 0.900, p < 0.001, 95 % CI [0.48 to 1.33], k = 5, n = 139<br>language g <sup>+</sup> = 0.570, p = 0.360, 95 % CI [- 0.65 to 1.79], k = 3, n = 184<br>verb. learning / memory g <sup>+</sup> = 0.525, p = 0.085, 95 % CI [- 0.07 to 1.13], k = 4, n = 171<br>global cognition <sup>(1-3)**</sup> g <sup>+</sup> = 0.436, p = 0.001, 95 % CI [0.18 to 0.69], k = 17, n = 926<br>global cognition <sup>(1)*</sup> g <sup>+</sup> = 0.435, p = 0.030, 95 % CI [0.04 to 0.83], k = 8, n = 632<br>reasoning g <sup>+</sup> = 0.393, p = 0.495, 95 % CI [- 0.74 to 1.52], k = 3, n = 134<br>global cognition <sup>(1 &amp; 2)*</sup> g <sup>+</sup> = 0.363, p = 0.020, 95 % CI [0.06 to 0.67], k = 12, n = 768<br>cognitive flexibility* g <sup>+</sup> = 0.348, p = 0.049, 95 % CI [0.002 to 0.694], k = 8, n = 245<br>visuo-spatial skills * g <sup>+</sup> = 0.345, p = 0.033, 95 % CI [0.03 to 0.66], k = 4, n = 226<br>attention / proc. speed* g <sup>+</sup> = 0.298, p = 0.027, 95 % CI [0.03 to 0.56], k = 11, n = 688<br>Executive Function* g <sup>+</sup> = 0.256, p = 0.048, 95 % CI [0.002 to 0.510], k = 13, n = 745<br>working memory g <sup>+</sup> = 0.032, p = 0.831, 95 % CI [- 0.26 to 0.33], k = 4, n = 171<br>HOA:<br>global cognition <sup>(1-3)**</sup> g <sup>+</sup> = 0.573, p = 0.010, 95 % CI [0.14 to 1.01], k = 9, n = 415<br>mNCD (mixed):<br>global cognition <sup>(1-3)*</sup> g <sup>+</sup> = 0.340, p = 0.017, 95 % CI [0.06 to 0.62], k = 6, n = 193<br><input type="checkbox"/> Brain / Neurochemicals / HRV<br><br><input type="checkbox"/> Physical Outcomes, Mobility, and Activities of Daily Living<br><br><input type="checkbox"/> Psychosocial Outcomes |
|                           |                                                                                                                                                                                                                                                                                                                                                                                                                                                                                                                                                                                                                                                                                                                                                                  |                                                                                                                                                                                                                                                                                                                                                                                                                                                                                                                                                                                                                                                                                                                                                                                                                                                                                                                                                                                                                                                                                                                                                                                                                                                                                                                                                                                                                                                                                                                                                                                                                                                                                                                                                                                                                                                                                                                    |

|                                   |                                                                                                                                                                                                                                                                                                                                                                                                                                                                                                                                                             |                                                                                                                                                                                                                                                                                                                                                                                                                                                                                                                                                                                                                                                                                                                                                                                                                                                                                                                                                                                                                                                                                                                                                                                                                                                                                                                                                                                                                                                                                                                                                                                                                                                                                                                                                                                                                                                                                                                                                                                                                                                                                                                                                                                                                                                                                                                                                                                                                                                                                                                                                                                                                                                                                                                                                                                                                        |
|-----------------------------------|-------------------------------------------------------------------------------------------------------------------------------------------------------------------------------------------------------------------------------------------------------------------------------------------------------------------------------------------------------------------------------------------------------------------------------------------------------------------------------------------------------------------------------------------------------------|------------------------------------------------------------------------------------------------------------------------------------------------------------------------------------------------------------------------------------------------------------------------------------------------------------------------------------------------------------------------------------------------------------------------------------------------------------------------------------------------------------------------------------------------------------------------------------------------------------------------------------------------------------------------------------------------------------------------------------------------------------------------------------------------------------------------------------------------------------------------------------------------------------------------------------------------------------------------------------------------------------------------------------------------------------------------------------------------------------------------------------------------------------------------------------------------------------------------------------------------------------------------------------------------------------------------------------------------------------------------------------------------------------------------------------------------------------------------------------------------------------------------------------------------------------------------------------------------------------------------------------------------------------------------------------------------------------------------------------------------------------------------------------------------------------------------------------------------------------------------------------------------------------------------------------------------------------------------------------------------------------------------------------------------------------------------------------------------------------------------------------------------------------------------------------------------------------------------------------------------------------------------------------------------------------------------------------------------------------------------------------------------------------------------------------------------------------------------------------------------------------------------------------------------------------------------------------------------------------------------------------------------------------------------------------------------------------------------------------------------------------------------------------------------------------------------|
| <p>Howes et al.<br/>2017 [45]</p> | <p><b>POPULATION:</b><br/> <input checked="" type="checkbox"/> healthy older adults<br/> <input type="checkbox"/> older adults with mNCD<br/> <input type="checkbox"/> older adults with Dementia</p> <p><b>INTERVENTION:</b><br/> <input type="checkbox"/> sequential motor-cognitive<br/> <input type="checkbox"/> coupled motor-cognitive<br/> <input checked="" type="checkbox"/> exergame/VR/active videogame<br/> <input type="checkbox"/> mixed cognitive-motor int.</p> <p><b>COMPARISON:</b><br/> (1) active control<br/> (2) inactive control</p> | <p><input checked="" type="checkbox"/> <b>Cognition</b></p> <p>executive function <sup>(1 &amp; 2)*</sup> <math>g^+ = -0.48, p = 0.003, 95\% \text{ CI } [-0.80 \text{ to } -0.17], k = 8, n = 459</math> <input checked="" type="checkbox"/> sign. <input type="checkbox"/> n.s. low<br/> executive function <sup>(1)**</sup> <math>g^+ = -0.65, p &lt; 0.001, 95\% \text{ CI } [-1.03 \text{ to } -0.28], k = 3, n = 144</math> <input type="checkbox"/> sign. <input checked="" type="checkbox"/> n.s. low<br/> executive function <sup>(2)*</sup> <math>g^+ = -0.40, p = 0.05, 95\% \text{ CI } [-0.79 \text{ to } -0.00], k = 5, n = 315</math> <input checked="" type="checkbox"/> sign. <input type="checkbox"/> n.s. low</p> <p><input type="checkbox"/> Brain / Neurochemicals / HRV</p> <p><input checked="" type="checkbox"/> <b>Physical Outcomes, Mobility, and Activities of Daily Living</b></p> <p>balance <sup>(1 &amp; 2)*</sup> <math>g^+ = 0.52, p &lt; 0.05, 95\% \text{ CI } [0.24 \text{ to } 0.79], k = 17, n = 743</math> NR low<br/> balance <sup>(1)*</sup> <math>g^+ = 0.56, p &lt; 0.05, 95\% \text{ CI } [0.25 \text{ to } 0.87], k = 10, n = 394</math> NR very low<br/> balance <sup>(2)*</sup> <math>g^+ = 0.51, p &lt; 0.05, 95\% \text{ CI } [0.02 \text{ to } 1.01], k = 7, n = 349</math> NR very low<br/> funct. exercise cap. <sup>(1 &amp; 2)*</sup> <math>g^+ = 0.29, p &lt; 0.05, 95\% \text{ CI } [0.04 \text{ to } 0.55], k = 7, n = 248</math> NR low<br/> funct. exercise cap. <sup>(1)*</sup> <math>g^+ = 0.58, p &lt; 0.05, 95\% \text{ CI } [0.09 \text{ to } 1.07], k = 3, n = 70</math> NR very low<br/> funct. exercise cap. <sup>(2)</sup> <math>g^+ = 0.19, p &gt; 0.05, 95\% \text{ CI } [-0.11 \text{ to } 0.48], k = 4, n = 178</math> NR very low<br/> functional mobility <sup>(1 &amp; 2)</sup> <math>g^+ = -0.36, p &gt; 0.05, 95\% \text{ CI } [-0.36 \text{ to } 0.09], k = 16, n = 670</math> NR very low<br/> functional mobility <sup>(1)</sup> <math>g^+ = -0.12, p &gt; 0.05, 95\% \text{ CI } [-0.48 \text{ to } 0.25], k = 6, n = 260</math> NR very low<br/> functional mobility <sup>(2)</sup> <math>g^+ = -0.14, p &gt; 0.05, 95\% \text{ CI } [-0.45 \text{ to } 0.17], k = 10, n = 410</math> NR very low</p> <p><input checked="" type="checkbox"/> <b>Psychosocial Outcomes</b></p> <p>fear of falling <sup>(1 &amp; 2)</sup> <math>g^+ = 0.18, p &gt; 0.05, 95\% \text{ CI } [-0.16 \text{ to } 0.53], k = 16, n = 816</math> NR very low<br/> fear of falling <sup>(1)</sup> <math>g^+ = 0.28, p &gt; 0.05, 95\% \text{ CI } [-0.50 \text{ to } 1.05], k = 8, n = 325</math> NR very low<br/> fear of falling <sup>(2)</sup> <math>g^+ = 0.10, p &gt; 0.05, 95\% \text{ CI } [-0.09 \text{ to } 0.29], k = 8, n = 491</math> NR low</p> |
|-----------------------------------|-------------------------------------------------------------------------------------------------------------------------------------------------------------------------------------------------------------------------------------------------------------------------------------------------------------------------------------------------------------------------------------------------------------------------------------------------------------------------------------------------------------------------------------------------------------|------------------------------------------------------------------------------------------------------------------------------------------------------------------------------------------------------------------------------------------------------------------------------------------------------------------------------------------------------------------------------------------------------------------------------------------------------------------------------------------------------------------------------------------------------------------------------------------------------------------------------------------------------------------------------------------------------------------------------------------------------------------------------------------------------------------------------------------------------------------------------------------------------------------------------------------------------------------------------------------------------------------------------------------------------------------------------------------------------------------------------------------------------------------------------------------------------------------------------------------------------------------------------------------------------------------------------------------------------------------------------------------------------------------------------------------------------------------------------------------------------------------------------------------------------------------------------------------------------------------------------------------------------------------------------------------------------------------------------------------------------------------------------------------------------------------------------------------------------------------------------------------------------------------------------------------------------------------------------------------------------------------------------------------------------------------------------------------------------------------------------------------------------------------------------------------------------------------------------------------------------------------------------------------------------------------------------------------------------------------------------------------------------------------------------------------------------------------------------------------------------------------------------------------------------------------------------------------------------------------------------------------------------------------------------------------------------------------------------------------------------------------------------------------------------------------------|

Table S4: Synthesis of Evidence for Moderating Effects of Training Parameters in Older Adults with mNCD or Dementia based on Meta-Analyses  
color-coding: black = significant effect, grey = no significant effect  
\* = significant at  $p \leq 0.05$ , \*\* = significant at  $p \leq 0.01$   
↑ = significant improvement, ↗ trend for improvement, → no significant effect

Abbreviations: DUAL = simultaneous cognitive-motor training, COG = cognitive training, g = Hedge's g, k = number of studies; MD = mean difference (absolute), mNCD = mild neurocognitive disorder, n = number of participants; NR = not reported, PHYS = physical training, SMD = standardized mean difference, SE = standard error

| Parameter | Moderating Effects                                                 |                              |                     |                                                                                                                                                                                                                                                                                |                                                                                                                                                                                                                                                                                                                                                                                                                                                                                                                                                                                                                                                |
|-----------|--------------------------------------------------------------------|------------------------------|---------------------|--------------------------------------------------------------------------------------------------------------------------------------------------------------------------------------------------------------------------------------------------------------------------------|------------------------------------------------------------------------------------------------------------------------------------------------------------------------------------------------------------------------------------------------------------------------------------------------------------------------------------------------------------------------------------------------------------------------------------------------------------------------------------------------------------------------------------------------------------------------------------------------------------------------------------------------|
|           | Outcome                                                            | Reference                    | Type of Training    | Variable & Relation                                                                                                                                                                                                                                                            | Statistics                                                                                                                                                                                                                                                                                                                                                                                                                                                                                                                                                                                                                                     |
| Frequency | ☒ Cognition                                                        |                              |                     |                                                                                                                                                                                                                                                                                |                                                                                                                                                                                                                                                                                                                                                                                                                                                                                                                                                                                                                                                |
|           | Older Adults with mNCD/Dementia:                                   |                              |                     |                                                                                                                                                                                                                                                                                |                                                                                                                                                                                                                                                                                                                                                                                                                                                                                                                                                                                                                                                |
|           | Global Cognition: subgroup analysis                                | Bahar-Fuchs et al. 2019 [5]  | ☒ COG ☐ PHYS ☐ DUAL | pooled estimate**<br>≤ 3x/week*<br>> 3x/week*                                                                                                                                                                                                                                  | SMD <sup>+</sup> = 0.42, $p < 0.0001$ , 95 % CI [0.23 to 0.61], k = 27<br>SMD <sup>+</sup> = 0.33, $p = 0$ , 95 % CI [0.13 to 0.53], k = 20<br>SMD <sup>+</sup> = 0.71, $p = 0$ , 95 % CI [0.27 to 1.14], k = 7<br>Chi <sup>2</sup> = 2.39, $p = 0.12$ , I <sup>2</sup> = 58.13 %                                                                                                                                                                                                                                                                                                                                                              |
|           | moderator analysis                                                 | Sanders et al. 2019 [26]     | ☐ COG ☒ PHYS ☐ DUAL | between-group diff. ↗<br>moderator effect* ↑*                                                                                                                                                                                                                                  | F(2, 51) = 1.589, $p < 0.05$<br>g <sup>+</sup> = 0.22, $p < 0.05$ , 95 % CI [0.05 to 0.39], k = 13<br>g <sup>+</sup> = 0.05, $p > 0.05$ , 95 % CI [-0.15 to 0.26]<br>g <sup>+</sup> = 0.35, $p < 0.05$ , 95 % CI [0.04 to 0.66]                                                                                                                                                                                                                                                                                                                                                                                                                |
|           | subgroup analysis                                                  | Groot et al. 2015 [36]       | ☐ COG ☒ PHYS ☐ DUAL | post-hoc testreference = 2x/week →<br>4x/week** ↑*<br>post-hoc testreference = 2x/week* ↑*                                                                                                                                                                                     | β = 0.22, 95 % CI [-0.16 to 0.61], $p > 0.05$<br>g <sup>+</sup> = 0.50, $p < 0.01$ , 95 % CI [0.24 to 0.76]<br>β = 0.42, 95 % CI [0.06 to 0.78], $p < 0.05$                                                                                                                                                                                                                                                                                                                                                                                                                                                                                    |
|           |                                                                    |                              |                     | pooled estimate**<br>multicomponentpooled (1)**<br>aerobic onlypooled (2)**<br>resistance onlypooled (3)<br>low frequency (1-3)*<br>high frequency (1-3)**<br>between-group diff. (1-3)** ↓**<br>low frequency (1+2)**<br>high frequency (1+2)*<br>between-group diff. (1+2) → | SMD <sup>+</sup> = 0.42, $p < 0.01$ , 95 % CI [0.23 to 0.62], k = 16<br>SMD <sup>+</sup> = 0.59, $p < 0.01$ , 95 % CI [0.32 to 0.86], k = 6<br>SMD <sup>+</sup> = 0.41, $p < 0.01$ , 95 % CI [0.05 to 0.76], k = 6<br>SMD <sup>+</sup> = -0.10, $p > 0.05$ , 95 % CI [-0.38 to 0.19], k = 4<br>SMD <sup>+</sup> = 0.33, $p < 0.05$ , 95 % CI [0.03 to 0.63], k = 7<br>SMD <sup>+</sup> = 0.64, $p < 0.01$ , 95 % CI [0.39 to 0.89], k = 7<br>t(12) = 4.02, $p < 0.01$<br>SMD <sup>+</sup> = 0.68, $p < 0.01$ , 95 % CI [0.39 to 0.96], k = 5<br>SMD <sup>+</sup> = 0.47, $p < 0.05$ , 95 % CI [0.06 to 0.88], k = 5<br>t(8) = 1.79, $p = 0.11$ |
|           | Executive Function: subgroup analysis                              | Bahar-Fuchs et al. 2019 [5]  | ☒ COG ☐ PHYS ☐ DUAL | pooled estimate**<br>≤ 3x/week*<br>> 3x/week*                                                                                                                                                                                                                                  | SMD <sup>+</sup> = 0.75, $p = 0$ , 95 % CI [0.28 to 1.22], k = 12<br>SMD <sup>+</sup> = 0.57, $p = 0.04$ , 95 % CI [0.01 to 1.13], k = 8<br>SMD <sup>+</sup> = 1.20, $p = 0.02$ , 95 % CI [0.2 to 2.20], k = 4<br>Chi <sup>2</sup> = 1.14, $p = 0.29$ , I <sup>2</sup> = 12.19 %                                                                                                                                                                                                                                                                                                                                                               |
|           | Learning and Memory: subgroup analysis                             | Bahar-Fuchs et al. 2019 [5]  | ☒ COG ☐ PHYS ☐ DUAL | immediate memory:<br>pooled estimate**<br>≤ 3x/week**<br>> 3x/week**<br>between-group diff. →                                                                                                                                                                                  | SMD <sup>+</sup> = 0.74, $p < 0.0001$ , 95 % CI [0.29 to 1.19], k = 18<br>SMD <sup>+</sup> = 0.73, $p = 0$ , 95 % CI [0.27 to 1.19], k = 14<br>SMD <sup>+</sup> = 0.74, $p = 0$ , 95 % CI [0.29 to 1.19], k = 4<br>Chi <sup>2</sup> = 0, $p = 0.97$ , I <sup>2</sup> = 0 %                                                                                                                                                                                                                                                                                                                                                                     |
|           | Language: subgroup analysis                                        | Bahar-Fuchs et al. 2019 [5]  | ☒ COG ☐ PHYS ☐ DUAL | pooled estimate<br>≤ 3x/week<br>> 3x/week*<br>between-group diff. →                                                                                                                                                                                                            | SMD <sup>+</sup> = 0.22, $p = 0.13$ , 95 % CI [-0.07 to 0.50], k = 12<br>SMD <sup>+</sup> = 0.05, $p = 0.57$ , 95 % CI [-0.13 to 0.24], k = 9<br>SMD <sup>+</sup> = 1.00, $p = 0.03$ , 95 % CI [0.09 to 1.92], k = 3<br>Chi <sup>2</sup> = 3.96, $p = 0.05$ , I <sup>2</sup> = 74.72 %                                                                                                                                                                                                                                                                                                                                                         |
|           | Mixed Healthy Older Adults and Older Adults with mNCD or Dementia: |                              |                     |                                                                                                                                                                                                                                                                                |                                                                                                                                                                                                                                                                                                                                                                                                                                                                                                                                                                                                                                                |
|           | Global Cognition: bivariate correlation                            | Gomes-Osman et al. 2018 [46] | ☐ COG ☒ PHYS ☐ DUAL | frequency (per week) →                                                                                                                                                                                                                                                         | r = -0.05, $p = 0.67$                                                                                                                                                                                                                                                                                                                                                                                                                                                                                                                                                                                                                          |
|           | Healthy Older Adults:                                              |                              |                     |                                                                                                                                                                                                                                                                                |                                                                                                                                                                                                                                                                                                                                                                                                                                                                                                                                                                                                                                                |
|           | Global Cognition: moderator analysis                               | Sanders et al. 2019 [26]     | ☐ COG ☒ PHYS ☐ DUAL | moderator effect<br>pooled estimate**<br>1x/week<br>2x/week*<br>3x/week**<br>4x/week                                                                                                                                                                                           | → F(3, 128) = 0.283, $p > 0.05$<br>g <sup>+</sup> = 0.26, $p < 0.01$ , 95 % CI [0.15 to 0.37], k = 23<br>g <sup>+</sup> = 0.23, $p > 0.05$ , 95 % CI [-0.17 to 0.63]<br>g <sup>+</sup> = 0.34, $p < 0.05$ , 95 % CI [0.07 to 0.62]<br>g <sup>+</sup> = 0.23, $p < 0.01$ , 95 % CI [0.09 to 0.37]<br>g <sup>+</sup> = 0.41, $p > 0.05$ , 95 % CI [-0.19 to 1.00]                                                                                                                                                                                                                                                                                |
|           | subgroup analysis                                                  | Jia et al. 2019 [23]         | ☐ COG ☒ PHYS ☐ DUAL | pooled estimate**<br>up to 3x/week*<br>> 3x/week*                                                                                                                                                                                                                              | SMD <sup>+</sup> = 1.12, $p < 0.001$ , 95 % CI [0.66 to 1.59], k = 13<br>SMD <sup>+</sup> = 1.58, 95 % CI [1.01 to 2.14], k = 3<br>SMD <sup>+</sup> = 0.99, 95 % CI [0.49 to 1.50], k = 10                                                                                                                                                                                                                                                                                                                                                                                                                                                     |
|           | moderator analysis                                                 | Northey et al. 2018 [30]     | ☐ COG ☒ PHYS ☒ DUAL | between-group difference →<br>moderator effect** ↑**<br>pooled estimate**<br>< 2x/week*<br>3 - 4x/week*                                                                                                                                                                        | NR<br>Qs = 24.12, $p < 0.01$<br>SMD <sup>+</sup> = 0.29, $p < 0.01$ , 95 % CI [0.17 to 0.41], k = 36<br>SMD <sup>+</sup> = 0.32, $p < 0.05$ , 95 % CI [0.13 to 0.52], n = 92<br>SMD <sup>+</sup> = 0.24, $p < 0.05$ , 95 % CI [0.07 to 0.52], n = 229                                                                                                                                                                                                                                                                                                                                                                                          |



|                                    |                                                                                                 |                              |                                                                                                                           |                                                                                                                                                                                              |                   |                                                                                                                                                                                                                                                                                                                                                                                                                                                                                                                                                          |
|------------------------------------|-------------------------------------------------------------------------------------------------|------------------------------|---------------------------------------------------------------------------------------------------------------------------|----------------------------------------------------------------------------------------------------------------------------------------------------------------------------------------------|-------------------|----------------------------------------------------------------------------------------------------------------------------------------------------------------------------------------------------------------------------------------------------------------------------------------------------------------------------------------------------------------------------------------------------------------------------------------------------------------------------------------------------------------------------------------------------------|
| Intensity / Complexity (continued) | subgroup-analysis                                                                               | Biazus-Sehn et al. 2020 [19] | <input type="checkbox"/> COG <input checked="" type="checkbox"/> PHYS <input checked="" type="checkbox"/> DUAL            | pooled effect*<br>light intensity<br>moderate intensity*<br>vigorous intensity                                                                                                               | ↑*                | SMD <sup>+</sup> = 0.18, p = 0.047, 95 % CI [0.00 to 0.36], k = 17<br>SMD <sup>+</sup> = 0.26, p = 0.244, 95 % CI [-0.18 to 0.70]<br>SMD <sup>+</sup> = 0.66, p = 0.002, 95 % CI [0.023 to 1.09]<br>SMD <sup>+</sup> = -0.01, p = 0.930, 95 % CI [-0.35 to 0.32]                                                                                                                                                                                                                                                                                         |
|                                    | Healthy Older Adults:                                                                           |                              |                                                                                                                           |                                                                                                                                                                                              |                   |                                                                                                                                                                                                                                                                                                                                                                                                                                                                                                                                                          |
|                                    | Global cognition:<br>moderator analysis                                                         | Sanders et al. 2019 [26]     | <input type="checkbox"/> COG <input checked="" type="checkbox"/> PHYS <input type="checkbox"/> DUAL                       | moderator effect<br>aerobic exerc. (pooled)**<br>low intensity<br>moderate intensity**<br>high intensity<br>multicomp. ex. (pooled)<br>low intensity<br>moderate intensity<br>high intensity | →                 | F(2, 77) = 2.396, p > 0.05 AND F(2, 40) = 0.243, p > 0.05<br>g <sup>+</sup> = 0.22, p < 0.01, 95 % CI [0.03 to 0.41]<br>g <sup>+</sup> = 0.65, p > 0.05, 95 % CI [-0.32 to 1.62]<br>g <sup>+</sup> = 0.25, p < 0.01, 95 % CI [0.07 to 0.43]<br>g <sup>+</sup> = -0.30, p > 0.05, 95 % CI [-0.94 to 0.34]<br>g <sup>+</sup> = 0.30, p > 0.05, 95 % CI [-0.01 to 0.60]<br>g <sup>+</sup> = 0.03, p > 0.05, 95 % CI [-1.77 to 1.84]<br>g <sup>+</sup> = 0.24, p > 0.05, 95 % CI [-1.57 to 2.04]<br>g <sup>+</sup> = 0.49, p > 0.05, 95 % CI [-0.80 to 1.79] |
|                                    | moderator analysis                                                                              | Northey et al. 2018 [30]     | <input type="checkbox"/> COG <input checked="" type="checkbox"/> PHYS <input type="checkbox"/> DUAL                       | moderator effect<br>aerobic exerc. (pooled)**<br>low intensity<br>moderate intensity<br>high intensity                                                                                       | ↑**               | Q <sub>s</sub> = 13.55, p < 0.01<br>SMD <sup>+</sup> = 0.29, p < 0.01, 95 % CI [0.17 to 0.41], k = 36<br>SMD <sup>+</sup> = 0.10, p > 0.05, 95 % CI [-0.02 to 0.23], n = 71<br>SMD <sup>+</sup> = 0.17, p < 0.05, 95 % CI [0.03 to 0.33], n = 57<br>SMD <sup>+</sup> = 0.16, p < 0.05, 95 % CI [0.04 to 0.27], n = 8                                                                                                                                                                                                                                     |
|                                    | moderator analysis                                                                              | Toril et al. 2014 [16]       | <input checked="" type="checkbox"/> COG <input type="checkbox"/> PHYS <input type="checkbox"/> DUAL                       | moderator effect<br>pooled estimate**<br>simple games**<br>complex games**                                                                                                                   | →                 | Q(1) = 0.55, p > 0.05<br>d <sup>+</sup> = 0.37, p < 0.01, 95 % CI [0.26 to 0.48]<br>d <sup>+</sup> = 0.42, p < 0.01, 95 % CI [0.25 to 0.58]<br>d <sup>+</sup> = 0.33, p < 0.01, 95 % CI [0.18 to 0.48]                                                                                                                                                                                                                                                                                                                                                   |
|                                    | <input type="checkbox"/> Brain / Neurochemicals / HRV                                           |                              |                                                                                                                           |                                                                                                                                                                                              |                   |                                                                                                                                                                                                                                                                                                                                                                                                                                                                                                                                                          |
|                                    |                                                                                                 |                              |                                                                                                                           |                                                                                                                                                                                              |                   |                                                                                                                                                                                                                                                                                                                                                                                                                                                                                                                                                          |
|                                    | <input checked="" type="checkbox"/> Physical Outcomes, Mobility, and Activities of Daily Living |                              |                                                                                                                           |                                                                                                                                                                                              |                   |                                                                                                                                                                                                                                                                                                                                                                                                                                                                                                                                                          |
|                                    | Healthy Older Adults:                                                                           |                              |                                                                                                                           |                                                                                                                                                                                              |                   |                                                                                                                                                                                                                                                                                                                                                                                                                                                                                                                                                          |
|                                    | Fall Rate:<br>meta-regression                                                                   | Sherrington et al. 2017 [33] | <input type="checkbox"/> COG <input checked="" type="checkbox"/> PHYS <input checked="" type="checkbox"/> DUAL            | resistance training<br>moderate-high intensity<br>high-intensity<br>balance training<br>moderate-high challenge<br>high challenge*                                                           | →<br>→<br>→<br>↑* | RR <sup>+</sup> (95 % CI) = 0.97 (0.82 to 1.15), p = 0.73, ΔI <sup>2</sup> = 4 %<br>RR <sup>+</sup> (95 % CI) = 1.23 (0.96 to 1.57), p = 0.11, ΔI <sup>2</sup> = 9 %<br>RR <sup>+</sup> (95 % CI) = 0.85 (0.71 to 1.00), p = 0.06, ΔI <sup>2</sup> = 19 %<br>RR <sup>+</sup> (95 % CI) = 0.85 (0.73 to 1.00), p = 0.04, ΔI <sup>2</sup> = 28 %                                                                                                                                                                                                           |
| Type (of training)                 | <input type="checkbox"/> Psychosocial Outcomes                                                  |                              |                                                                                                                           |                                                                                                                                                                                              |                   |                                                                                                                                                                                                                                                                                                                                                                                                                                                                                                                                                          |
|                                    |                                                                                                 |                              |                                                                                                                           |                                                                                                                                                                                              |                   |                                                                                                                                                                                                                                                                                                                                                                                                                                                                                                                                                          |
|                                    | <input checked="" type="checkbox"/> Cognition                                                   |                              |                                                                                                                           |                                                                                                                                                                                              |                   |                                                                                                                                                                                                                                                                                                                                                                                                                                                                                                                                                          |
|                                    | Older Adults with mNCD/Dementia:                                                                |                              |                                                                                                                           |                                                                                                                                                                                              |                   |                                                                                                                                                                                                                                                                                                                                                                                                                                                                                                                                                          |
|                                    | Global Cognition:<br>network meta-analysis                                                      | Gavelin et al. 2021 [39]     | <input checked="" type="checkbox"/> COG <input checked="" type="checkbox"/> PHYS <input checked="" type="checkbox"/> DUAL | pairwise comparisons<br>pooled estimate*<br>simultaneous training*<br>sequential training<br>cognitive training<br>exergaming<br>physical training                                           |                   | see table 4 of publication<br>g <sup>+</sup> = 0.26, p = 0.02, 95 % CI [0.06 to 0.46], k = 13<br>g <sup>+</sup> = 0.45, p < 0.05, 95 % CI [0.11 to 0.78], k = 3<br>g <sup>+</sup> = 0.25, p > 0.05, 95 % CI [-0.05 to 0.55], k = 2<br>g <sup>+</sup> = 0.26, p > 0.05, 95 % CI [-0.12 to 0.64], k = 2<br>g <sup>+</sup> = 0.13, p > 0.05, 95 % CI [-0.22 to 0.48], k = 2<br>g <sup>+</sup> = 0.07, p > 0.05, 95 % CI [-0.26 to 0.39], k = 2                                                                                                              |
|                                    | subgroup analysis                                                                               | Biazus-Sehn et al. 2020 [19] | <input type="checkbox"/> COG <input checked="" type="checkbox"/> PHYS <input checked="" type="checkbox"/> DUAL            | pooled estimate**<br>aerobic training only<br>resistance training only<br>multicomp. training only<br>comb. cognitive-motor**                                                                | ↑**               | SMD <sup>+</sup> = 0.35, p < 0.001, 95 % CI [0.17 to 0.43], k = 18<br>SMD <sup>+</sup> = 0.19, p = 0.364, 95 % CI [-0.22 to 0.59]<br>SMD <sup>+</sup> = 0.19, p = 0.488, 95 % CI [-0.35 to 0.74]<br>SMD <sup>+</sup> = 0.38, p = 0.066, 95 % CI [-0.03 to 0.79]<br>SMD <sup>+</sup> = 0.53, p = 0.003, 95 % CI [0.17 to 0.53]                                                                                                                                                                                                                            |
|                                    | subgroup analysis                                                                               | Law et al. 2020 [22]         | <input type="checkbox"/> COG <input checked="" type="checkbox"/> PHYS <input type="checkbox"/> DUAL                       | between-group difference<br>pooled estimate**<br>aerobic training only**<br>multicomp. exerc. only**                                                                                         |                   | NR<br>SMD <sup>+</sup> = 0.42, p < 0.001, 95 % CI [0.25 to 0.59], k = 26<br>SMD <sup>+</sup> = 0.45, 95 % CI [0.15 to 0.76], k = 11, n = 704<br>SMD <sup>+</sup> = 0.43, 95 % CI [0.13 to 0.73], k = 9, n = 831                                                                                                                                                                                                                                                                                                                                          |
|                                    | subgroup analysis                                                                               | Bahar-Fuchs et al. 2019 [5]  | <input checked="" type="checkbox"/> COG <input type="checkbox"/> PHYS <input type="checkbox"/> DUAL                       | between-group difference<br>pooled estimate*<br>traditional training*<br>augmented training*                                                                                                 |                   | NR<br>SMD <sup>+</sup> = 0.42, p < 0.001, 95 % CI [0.23 to 0.61], k = 27<br>SMD <sup>+</sup> = 0.43, p = 0.95 % CI [0.18 to 0.68], k = 18<br>SMD <sup>+</sup> = 0.37, p = 0.01, 95 % CI [0.10 to 0.65], k = 9                                                                                                                                                                                                                                                                                                                                            |
|                                    | subgroup analysis                                                                               | Wu et al. 2019 [43]          | <input type="checkbox"/> COG <input type="checkbox"/> PHYS <input checked="" type="checkbox"/> DUAL                       | between-group difference<br>pooled estimate**<br>dance only*<br>tai chi only*                                                                                                                | →                 | Chi <sup>2</sup> = 0.09, p = 0.77, I <sup>2</sup> = 0 %<br>MD <sup>+</sup> = 0.92, p = 0.002, 95 % CI [0.33 to 1.51], k = 13<br>MD <sup>+</sup> = 1.12, p = 0.02, 95 % CI [0.16 to 2.08], k = 2<br>MD <sup>+</sup> = 0.97, p = 0.02, 95 % CI [0.19 to 1.76], k = 10                                                                                                                                                                                                                                                                                      |
|                                    | moderator analysis                                                                              | Sanders et al. 2019 [26]     | <input type="checkbox"/> COG <input checked="" type="checkbox"/> PHYS <input type="checkbox"/> DUAL                       | between-group difference<br>moderator effect<br>pooled estimate*<br>aerobic only                                                                                                             | →                 | p = 0.25, I <sup>2</sup> = 59 %<br>F(2, 51) = 0.432, p > 0.05<br>g <sup>+</sup> = 0.22, p < 0.05, 95 % CI [0.05 to 0.39], k = 13<br>g <sup>+</sup> = 0.22, p > 0.05, 95 % CI [-0.20 to 0.64]                                                                                                                                                                                                                                                                                                                                                             |

|                                     |                                             |                               |                     |                                                                                                                                                                                                                                                                                                          |                        |                                                                                                                                                                                                                                                                                                                                                                                                                                                                                                                                                                |
|-------------------------------------|---------------------------------------------|-------------------------------|---------------------|----------------------------------------------------------------------------------------------------------------------------------------------------------------------------------------------------------------------------------------------------------------------------------------------------------|------------------------|----------------------------------------------------------------------------------------------------------------------------------------------------------------------------------------------------------------------------------------------------------------------------------------------------------------------------------------------------------------------------------------------------------------------------------------------------------------------------------------------------------------------------------------------------------------|
| Type<br>(of training;<br>continued) | subgroup analysis                           | Panza et al. 2018 [31]        | ☐ COG ☑ PHYS ☐ DUAL | resistance only<br>multicomponent only**<br>between-group difference<br>pooled estimate**<br>aerobic training only*<br>multicomp. training only<br>between group difference<br>pooled estimate<br>aerobic training only<br>cognitive training only<br>between-group difference<br>computer based vs. not | →                      | g <sup>+</sup> = 0.22, p > 0.05, 95 % CI [-0.20 to 0.64]<br>g <sup>+</sup> = 0.36, p < 0.01, 95 % CI [0.04 to 0.68]<br>F(3, 182) = 0.322, p > 0.05<br>d <sup>+</sup> = 0.47, p < 0.05, 95 % CI [0.26 to 0.68], k = 23<br>d <sup>+</sup> = 0.65, p < 0.05, 95 % CI [0.35 to 0.95], k = 15<br>d <sup>+</sup> = 0.19, p > 0.05, 95 % CI [-0.06 to 0.43], k = 8<br>p = 0.11                                                                                                                                                                                        |
|                                     | subgroup analysis                           | Liang et al. 2018 [9]         | ☑ COG ☑ PHYS ☐ DUAL | pooled estimate<br>aerobic training only<br>cognitive training only<br>between-group difference<br>computer based vs. not                                                                                                                                                                                | →                      | SMD <sup>+</sup> = 0.13, p = 0.212, 95 % CI [-0.00 to 0.25], k = 15<br>SMD <sup>+</sup> = 0.35, p = 0.051, 95 % CI [-0.12 to 0.82], k = 4<br>SMD <sup>+</sup> = -0.02, p = 0.588, 95 % CI [-0.31 to 0.27], k = 4<br>NR                                                                                                                                                                                                                                                                                                                                         |
|                                     | direct comparison                           | Garcia-Casal et al. 2017 [11] | ☑ COG ☐ PHYS ☐ DUAL | computer based vs. not                                                                                                                                                                                                                                                                                   | ↑*                     | SMD <sup>+</sup> = 0.48, p = 0.02, 95 % CI [0.09 to 0.87], n = 119                                                                                                                                                                                                                                                                                                                                                                                                                                                                                             |
|                                     | subgroup analysis                           | Shermann et al. 2017 [14]     | ☑ COG ☐ PHYS ☐ DUAL | pooled estimate<br>restorative training<br>compensatory training<br>multidomain training*<br>between-group difference<br>group training<br>individual training*<br>computer training<br>between-group difference                                                                                         |                        | g <sup>+</sup> = 0.445, p = 0.002, 95 % CI [0.072 to 0.730], k = 26<br>g <sup>+</sup> = 0.389, p = 0.156, 95 % CI [-0.149 to 0.927], k = 8<br>g <sup>+</sup> = 0.623, p = 0.150, 95 % CI [-0.224 to 1.470], k = 3<br>g <sup>+</sup> = 0.438, p = 0.019, 95 % CI [0.072 to 0.804], k = 15<br>Q = 0.211, p = 0.900<br>g <sup>+</sup> = 0.297, p = 0.158, 95 % CI [-0.116 to 0.710], k = 12<br>g <sup>+</sup> = 1.008, p = 0.006, 95 % CI [0.293 to 1.723], k = 4<br>g <sup>+</sup> = 0.394, p = 0.098, 95 % CI [-0.072 to 0.859], k = 10<br>Q = 2.918, p = 0.232 |
|                                     | subgroup analysis                           | Groot et al. 2015 [36]        | ☐ COG ☑ PHYS ☐ DUAL | pooled estimate**<br>multicomponent <sup>(1)</sup> **<br>aerobic only <sup>(2)</sup> **<br>resistance only <sup>(3)</sup><br>subgroup diff. (1+2 vs 3)**<br>subgroup diff. (1 vs 3)**<br>subgroup diff. (2 vs 3)**<br>subgroup diff. (1 vs 2)                                                            | ↑**<br>↑**<br>↑**<br>→ | SMD <sup>+</sup> = 0.42, p < 0.01, 95 % CI [0.23 to 0.62], k = 16<br>SMD <sup>+</sup> = 0.59, p < 0.01, 95 % CI [0.32 to 0.86], k = 6<br>SMD <sup>+</sup> = 0.41, p < 0.01, 95 % CI [0.05 to 0.76], k = 6<br>SMD <sup>+</sup> = -0.10, p > 0.05, 95 % CI [-0.38 to 0.19], k = 4<br>t(14) = 9.08, p < 0.01<br>t(8) = 5.47, p < 0.01<br>t(8) = 4.54, p < 0.01<br>t(10) = 1.98, p = 0.08                                                                                                                                                                          |
|                                     | Complex Attention:<br>meta-regression       | Mansor et al. 2020 [3]        | ☐ COG ☐ PHYS ☑ DUAL | exergame<br>brain game**                                                                                                                                                                                                                                                                                 | ↓**                    | coefficient (SE) = 1.57 (1.02), p = 0.16<br>coefficient (SE) = -1.67 (0.44), p < 0.01                                                                                                                                                                                                                                                                                                                                                                                                                                                                          |
|                                     | subgroup analysis                           | Law et al. 2020 [22]          | ☐ COG ☑ PHYS ☐ DUAL | pooled estimate<br>aerobic training only<br>between-group difference                                                                                                                                                                                                                                     |                        | SMD <sup>+</sup> = 0.04, p = 0.52, 95 % CI [-0.07 to 0.15], k = 15<br>SMD <sup>+</sup> = 0.12, 95 % CI [-0.06 to 0.30], k = 6<br>NR                                                                                                                                                                                                                                                                                                                                                                                                                            |
|                                     | subgroup analysis                           | Bahar-Fuchs et al. 2019 [5]   | ☑ COG ☐ PHYS ☐ DUAL | pooled estimate*<br>traditional training<br>augmented training*<br>between-group difference                                                                                                                                                                                                              |                        | SMD <sup>+</sup> = 0.56, p = 0.02, 95 % CI [0.07 to 0.95], k = 12<br>SMD <sup>+</sup> = 0.56, p = 0.13, 95 % CI [-0.17 to 1.30], k = 8<br>SMD <sup>+</sup> = 0.51, p = 0.02, 95 % CI [0.07 to 0.95], k = 4<br>Chi <sup>2</sup> = 0.01, p = 0.91, I <sup>2</sup> = 0 %                                                                                                                                                                                                                                                                                          |
|                                     | Executive Function:<br>subgroup analysis    | Biazus-Sehn et al. 2020 [19]  | ☐ COG ☑ PHYS ☑ DUAL | pooled estimate*<br>aerobic training only<br>resistance training only<br>multicomp. training only<br>comb. cognitive-motor*                                                                                                                                                                              | ↑*                     | SMD <sup>+</sup> = 0.21, p = 0.026, 95 % CI [0.03 to 0.40], k = 19<br>SMD <sup>+</sup> = 0.13, p = 0.407, 95 % CI [-0.18 to 0.44]<br>SMD <sup>+</sup> = 0.14, p = 0.499, 95 % CI [-0.26 to 0.53]<br>SMD <sup>+</sup> = 0.04, p = 0.928, 95 % CI [-0.81 to 0.90]<br>SMD <sup>+</sup> = 0.50, p = 0.015, 95 % CI [0.93 to 0.91]<br>NR                                                                                                                                                                                                                            |
|                                     | subgroup analysis                           | Bahar-Fuchs et al. 2019 [5]   | ☑ COG ☐ PHYS ☐ DUAL | pooled estimate*<br>traditional training*<br>augmented training<br>between-group difference<br>pooled estimate<br>aerobic training only<br>between-group difference                                                                                                                                      | →                      | SMD <sup>+</sup> = 0.75, p = 0, 95 % CI [0.28 to 1.22], k = 12<br>SMD <sup>+</sup> = 0.64, p = 0.01, 95 % CI [0.14 to 1.14], k = 9<br>SMD <sup>+</sup> = 1.32, p = 0.10, 95 % CI [-0.26 to 2.91], k = 3<br>Chi <sup>2</sup> = 0.65, p = 0.42, I <sup>2</sup> = 0 %<br>SMD <sup>+</sup> = 0.03, p = 0.74, 95 % CI [-0.14 to 0.20], k = 8<br>SMD <sup>+</sup> = 0.01, 95 % CI [-0.16 to 0.19], k = 6<br>NR                                                                                                                                                       |
|                                     | Cognitive Flexibility:<br>subgroup analysis | Law et al. 2020 [22]          | ☐ COG ☑ PHYS ☐ DUAL | pooled estimate*<br>dance only<br>tai chi only<br>between-group difference                                                                                                                                                                                                                               |                        | MD <sup>+</sup> = -8.80, p = 0.007, 95 % CI [-15.2 to -2.4], k = 13<br>MD <sup>+</sup> = -6.19, p = 0.38, 95 % CI [-20.1 to 7.7], k = 3<br>MD <sup>+</sup> = -9.06, p = 0.11, 95 % CI [-20.0 to 1.9], k = 7<br>p = 0.82, I <sup>2</sup> = 0 %                                                                                                                                                                                                                                                                                                                  |
|                                     | subgroup analysis                           | Wu et al. 2019 [43]           | ☐ COG ☐ PHYS ☑ DUAL | between-group difference                                                                                                                                                                                                                                                                                 |                        |                                                                                                                                                                                                                                                                                                                                                                                                                                                                                                                                                                |
|                                     | Inhibition:<br>meta-regression              | Mansor et al. 2020 [3]        | ☐ COG ☐ PHYS ☑ DUAL | exergame<br>brain game                                                                                                                                                                                                                                                                                   | →                      | coefficient (SE) = 0.28 (0.28), p = 0.34<br>coefficient (SE) = 0.13 (0.31), p = 0.71                                                                                                                                                                                                                                                                                                                                                                                                                                                                           |
|                                     | Shifting:<br>meta-regression                | Mansor et al. 2020 [3]        | ☐ COG ☐ PHYS ☑ DUAL | exergame<br>brain game                                                                                                                                                                                                                                                                                   | →                      | coefficient (SE) = 0.49 (0.41), p = 0.25<br>coefficient (SE) = 0.13 (0.31), p = 0.71                                                                                                                                                                                                                                                                                                                                                                                                                                                                           |
|                                     | Updating:<br>meta-regression                | Mansor et al. 2020 [3]        | ☐ COG ☐ PHYS ☑ DUAL | exergame<br>brain game                                                                                                                                                                                                                                                                                   | →                      | coefficient (SE) = -0.32 (0.41), p = 0.44<br>coefficient (SE) = 0.18 (0.39), p = 0.65                                                                                                                                                                                                                                                                                                                                                                                                                                                                          |
|                                     | Working Memory:<br>subgroup analysis        | Wu et al. 2019 [43]           | ☐ COG ☐ PHYS ☑ DUAL | pooled estimate*<br>dance only<br>tai chi only<br>between-group difference                                                                                                                                                                                                                               | →                      | MD <sup>+</sup> = 0.32, p = 0.05, 95 % CI [0.01 to 0.64], k = 10<br>MD <sup>+</sup> = 0.41, p = 0.18, 95 % CI [-0.19 to 1.00], k = 2<br>MD <sup>+</sup> = 0.46, p = 0.06, 95 % CI [-0.03 to 0.94], k = 6<br>p = 0.52, I <sup>2</sup> = 0 %                                                                                                                                                                                                                                                                                                                     |
|                                     | Learning & Memory:<br>subgroup analysis     | Biazus-Sehn et al. 2020 [19]  | ☐ COG ☑ PHYS ☑ DUAL | pooled estimate*<br>aerobic training only<br>resistance training only<br>multicomp. training only<br>comb. cognitive-motor**                                                                                                                                                                             | ↑**                    | SMD <sup>+</sup> = 0.18, p = 0.047, 95 % CI [0.00 to 0.36], k = 17<br>SMD <sup>+</sup> = 0.07, p = 0.596, 95 % CI [-0.19 to 0.34]<br>SMD <sup>+</sup> = -0.04, p = 0.856, 95 % CI [-0.44 to 0.37]<br>SMD <sup>+</sup> = 0.01, p = 0.973, 95 % CI [-0.38 to 0.39]<br>SMD <sup>+</sup> = 0.59, p < 0.001, 95 % CI [0.27 to 0.92]                                                                                                                                                                                                                                 |

|                                     |                                                                                                 |                             |                                                                                                                           |                                                                                                                                                                                                                                                                                           |                                                                                                                                                                                                                                                                                                                                                                                                                                                                                                                                                         |
|-------------------------------------|-------------------------------------------------------------------------------------------------|-----------------------------|---------------------------------------------------------------------------------------------------------------------------|-------------------------------------------------------------------------------------------------------------------------------------------------------------------------------------------------------------------------------------------------------------------------------------------|---------------------------------------------------------------------------------------------------------------------------------------------------------------------------------------------------------------------------------------------------------------------------------------------------------------------------------------------------------------------------------------------------------------------------------------------------------------------------------------------------------------------------------------------------------|
| Type<br>(of training;<br>continued) | subgroup analysis                                                                               | Bahar-Fuchs et al. 2019 [5] | <input checked="" type="checkbox"/> COG <input type="checkbox"/> PHYS <input type="checkbox"/> DUAL                       | between-group difference<br><u>immediate memory:</u><br>pooled estimate*<br>traditional training*<br>augmented training*<br>→ between-group difference<br><u>delayed memory:</u><br>between-group difference<br>traditional training*<br>augmented training<br>→ between-group difference | NR<br><br>SMD <sup>+</sup> = 0.74, p < 0.001, 95 % CI [0.04 to 1.02], k = 18<br>SMD <sup>+</sup> = 0.82, p = 0, 95 % CI [0.33 to 1.30], k = 13<br>SMD <sup>+</sup> = 0.53, p = 0.03, 95 % CI [0.04 to 1.02], k = 5<br>Chi <sup>2</sup> = 0.65, p = 0.42, I <sup>2</sup> = 0 %<br><br>SMD <sup>+</sup> = 0.81, p = 0, 95 % CI [0.29 to 1.32], k = 11<br>SMD <sup>+</sup> = 0.86, p = 0.02, 95 % CI [0.15 to 1.58], k = 7<br>SMD <sup>+</sup> = 0.68, p = 0.09, 95 % CI [-0.11 to 1.46], k = 4<br>Chi <sup>2</sup> = 0.12, p = 0.73, I <sup>2</sup> = 0 % |
|                                     | Language Fluency:<br>subgroup analysis                                                          | Bahar-Fuchs et al. 2019 [5] | <input checked="" type="checkbox"/> COG <input type="checkbox"/> PHYS <input type="checkbox"/> DUAL                       | pooled estimate*<br>traditional training*<br>augmented training<br>→ between-group difference                                                                                                                                                                                             | SMD <sup>+</sup> = 0.52, p = 0.0005, 95 % CI [0.23 to 0.81], k = 9<br>SMD <sup>+</sup> = 0.64, p = 0, 95 % CI [0.26 to 1.01], k = 6<br>SMD <sup>+</sup> = 0.33, p = 0.05, 95 % CI [0 to 0.65], k = 3<br>Chi <sup>2</sup> = 1.5, p = 0.22, I <sup>2</sup> = 33.37 %                                                                                                                                                                                                                                                                                      |
|                                     | subgroup analysis                                                                               | Wu et al. 2019 [43]         | <input type="checkbox"/> COG <input type="checkbox"/> PHYS <input checked="" type="checkbox"/> DUAL                       | pooled estimate*<br>dance only**<br>tai chi only*<br>→ between-group difference                                                                                                                                                                                                           | MD <sup>+</sup> = 0.27, p = 0.003, 95 % CI [0.09 to 0.45], k = 9<br>MD <sup>+</sup> = 0.61, p < 0.001, 95 % CI [0.09 to 0.45], k = 1<br>MD <sup>+</sup> = 0.18, p = 0.05, 95 % CI [0.00 to 0.37], k = 6<br>p = 0.11, I <sup>2</sup> = 55.5 %                                                                                                                                                                                                                                                                                                            |
|                                     | Memory:<br>subgroup analysis                                                                    | Wu et al. 2019 [43]         | <input type="checkbox"/> COG <input type="checkbox"/> PHYS <input checked="" type="checkbox"/> DUAL                       | pooled estimate**<br>dance only*<br>tai chi only*<br>→ between-group difference                                                                                                                                                                                                           | MD <sup>+</sup> = 0.24, p = 0.001, 95 % CI [0.10 to 0.39], k = 15<br>MD <sup>+</sup> = 0.35, p = 0.003, 95 % CI [0.12 to 0.58], k = 3<br>MD <sup>+</sup> = 0.20, p = 0.005, 95 % CI [0.06 to 0.35], k = 7<br>p = 0.49, I <sup>2</sup> = 0 %                                                                                                                                                                                                                                                                                                             |
|                                     | Processing Speed:<br>subgroup analysis                                                          | Wu et al. 2019 [43]         | <input type="checkbox"/> COG <input type="checkbox"/> PHYS <input checked="" type="checkbox"/> DUAL                       | pooled estimate<br>dance only<br>tai chi only<br>→ between-group difference                                                                                                                                                                                                               | MD <sup>+</sup> = -1.44, p = 0.39, 95 % CI [-4.7 to 1.8], k = 9<br>MD <sup>+</sup> = -0.69, p = 0.22, 95 % CI [-1.78 to 0.41], k = 3<br>MD <sup>+</sup> = -1.29, p = 0.74, 95 % CI [-9.0 to 6.4], k = 4<br>p = 0.94, I <sup>2</sup> = 0 %                                                                                                                                                                                                                                                                                                               |
|                                     | Healthy Older Adults:                                                                           |                             |                                                                                                                           |                                                                                                                                                                                                                                                                                           |                                                                                                                                                                                                                                                                                                                                                                                                                                                                                                                                                         |
|                                     | Global Cognition:<br>network meta-analysis                                                      | Gavelin et al. 2021 [39]    | <input checked="" type="checkbox"/> COG <input checked="" type="checkbox"/> PHYS <input checked="" type="checkbox"/> DUAL | pairwise comparisons<br>pooled estimate*<br>simultaneous training*<br>sequential training*<br>cognitive training*<br>physical training*<br>exergaming*                                                                                                                                    | see table 4 of publication<br>g <sup>+</sup> = 0.20, p < 0.001, 95 % CI [0.12 to 0.29], k = 28<br>g <sup>+</sup> = 0.45, p < 0.05, 95 % CI [0.23 to 0.53], k = 2<br>g <sup>+</sup> = 0.38, p < 0.05, 95 % CI [0.22 to 0.56], k = 2<br>g <sup>+</sup> = 0.36, p < 0.05, 95 % CI [0.16 to 0.41], k = 1<br>g <sup>+</sup> = 0.24, p < 0.05, 95 % CI [0.07 to 0.38], k = 1<br>g <sup>+</sup> = 0.21, p < 0.05, 95 % CI [0.04 to 0.35], k = 5                                                                                                                |
|                                     | moderator analysis                                                                              | Sanders et al. 2019 [26]    | <input type="checkbox"/> COG <input checked="" type="checkbox"/> PHYS <input type="checkbox"/> DUAL                       | moderator effect<br>→ pooled estimate*<br>aerobic only*<br>resistance only**<br>multicomponent only                                                                                                                                                                                       | F(3, 128) = 0.081, p > 0.05<br>g <sup>+</sup> = 0.26, p < 0.01, 95 % CI [0.15 to 0.37], k = 23<br>g <sup>+</sup> = 0.22, p < 0.05, 95 % CI [0.03 to 0.41]<br>g <sup>+</sup> = 0.27, p < 0.01, 95 % CI [0.09 to 0.46]<br>g <sup>+</sup> = 0.30, p > 0.05, 95 % CI [-0.01 to 0.60]                                                                                                                                                                                                                                                                        |
|                                     | moderator analysis                                                                              | Northey et al. 2018 [30]    | <input type="checkbox"/> COG <input checked="" type="checkbox"/> PHYS <input type="checkbox"/> DUAL                       | moderator effect**<br>pooled estimate**<br>aerobic only**<br>resistance only**<br>multicomponent only**                                                                                                                                                                                   | Qs = 39.53, p < 0.01<br>SMD <sup>+</sup> = 0.29, p < 0.01, 95 % CI [0.17 to 0.41], k = 36<br>SMD <sup>+</sup> = 0.24, p < 0.01, 95 % CI [0.10 to 0.37], n = 153<br>SMD <sup>+</sup> = 0.29, p < 0.01, 95 % CI [0.13 to 0.44], n = 80<br>SMD <sup>+</sup> = 0.52, p < 0.01, 95 % CI [0.32 to 0.71], n = 80                                                                                                                                                                                                                                               |
|                                     | Executive Function:<br>moderator analysis                                                       | Chen et al. 2020 [20]       | <input type="checkbox"/> COG <input checked="" type="checkbox"/> PHYS <input checked="" type="checkbox"/> DUAL            | Type of training*<br>↑** aerobic training*<br>resistance training*<br>multicomp. training*<br>Tai Chi / Yoga*<br>cognitive-motor training*                                                                                                                                                | Q(4) = 226.18, p < 0.05<br>g <sup>+</sup> = 0.14, p < 0.05, 95 % CI [0.06 to 0.33], k = 45<br>g <sup>+</sup> = 0.22, p < 0.05, 95 % CI [0.10 to 0.33], k = 20<br>g <sup>+</sup> = 0.10, p < 0.05, 95 % CI [0.00 to 0.19], k = 18<br>g <sup>+</sup> = 0.38, p < 0.05, 95 % CI [0.27 to 0.49], k = 14<br>g <sup>+</sup> = 0.44, p < 0.05, 95 % CI [0.29 to 0.66], k = 10                                                                                                                                                                                  |
|                                     | <input type="checkbox"/> Brain / Neurochemicals / HRV                                           |                             |                                                                                                                           |                                                                                                                                                                                                                                                                                           |                                                                                                                                                                                                                                                                                                                                                                                                                                                                                                                                                         |
|                                     |                                                                                                 |                             |                                                                                                                           |                                                                                                                                                                                                                                                                                           |                                                                                                                                                                                                                                                                                                                                                                                                                                                                                                                                                         |
|                                     | <input checked="" type="checkbox"/> Physical Outcomes, Mobility, and Activities of Daily Living |                             |                                                                                                                           |                                                                                                                                                                                                                                                                                           |                                                                                                                                                                                                                                                                                                                                                                                                                                                                                                                                                         |
|                                     | Older Adults with mNCD/Dementia:                                                                |                             |                                                                                                                           |                                                                                                                                                                                                                                                                                           |                                                                                                                                                                                                                                                                                                                                                                                                                                                                                                                                                         |
|                                     | Global Physical Outc.:<br>network meta-analysis                                                 | Gavelin et al. 2021 [39]    | <input checked="" type="checkbox"/> COG <input checked="" type="checkbox"/> PHYS <input checked="" type="checkbox"/> DUAL | pairwise comparisons<br>pooled estimate*<br>sequential training*<br>simultaneous training<br>physical training<br>exergaming<br>cognitive training                                                                                                                                        | see table 4 of publication<br>g <sup>+</sup> = 0.32, p = 0.008, 95 % CI [0.12 to 0.52], k = 8<br>g <sup>+</sup> = 0.66, p < 0.05, 95 % CI [0.13 to 1.19], k = 2<br>g <sup>+</sup> = 0.36, p > 0.05, 95 % CI [-0.02 to 0.75], k = 2<br>g <sup>+</sup> = 0.26, p > 0.05, 95 % CI [-0.19 to 0.70], k = 1<br>g <sup>+</sup> = 0.22, p > 0.05, 95 % CI [-0.11 to 0.54], k = 1<br>g <sup>+</sup> = -0.09, p > 0.05, 95 % CI [-0.57 to 0.40], k = 5                                                                                                            |
|                                     | Healthy Older Adults:                                                                           |                             |                                                                                                                           |                                                                                                                                                                                                                                                                                           |                                                                                                                                                                                                                                                                                                                                                                                                                                                                                                                                                         |

|                                     |                                                                                                       |                                                                                                    |                                                                                                                                                                                                                                                                                                                              |                                                                                                                                                                                                                                                                                                                                |                                                                                                                                                                                                                                                                                                                                                                                                                                                                                                                                                                                                                                                                                                                                                                                                                                                 |
|-------------------------------------|-------------------------------------------------------------------------------------------------------|----------------------------------------------------------------------------------------------------|------------------------------------------------------------------------------------------------------------------------------------------------------------------------------------------------------------------------------------------------------------------------------------------------------------------------------|--------------------------------------------------------------------------------------------------------------------------------------------------------------------------------------------------------------------------------------------------------------------------------------------------------------------------------|-------------------------------------------------------------------------------------------------------------------------------------------------------------------------------------------------------------------------------------------------------------------------------------------------------------------------------------------------------------------------------------------------------------------------------------------------------------------------------------------------------------------------------------------------------------------------------------------------------------------------------------------------------------------------------------------------------------------------------------------------------------------------------------------------------------------------------------------------|
| Type<br>(of training;<br>continued) | Global Physical Outc.:<br>network meta-analysis                                                       | Gavelin et al.<br>2021 [39]                                                                        | <input checked="" type="checkbox"/> COG <input checked="" type="checkbox"/> PHYS <input checked="" type="checkbox"/> DUAL                                                                                                                                                                                                    | pairwise comparisons<br>pooled estimate*<br>simultaneous training*<br>sequential training*<br>physical training*<br>exergaming*<br>cognitive training                                                                                                                                                                          | see table 4 of publication<br>$g^+ = 0.23, p = 0.005, 95\% \text{ CI } [0.08 \text{ to } 0.38], k = 24$<br>$g^+ = 0.50, p < 0.05, 95\% \text{ CI } [0.24 \text{ to } 0.77], k = 2$<br>$g^+ = 0.43, p < 0.05, 95\% \text{ CI } [0.20 \text{ to } 0.65], k = 2$<br>$g^+ = 0.38, p < 0.05, 95\% \text{ CI } [0.15 \text{ to } 0.61], k = 1$<br>$g^+ = 0.23, p < 0.05, 95\% \text{ CI } [0.03 \text{ to } 0.43], k = 1$<br>$g^+ = 0.18, p > 0.05, 95\% \text{ CI } [-0.11 \text{ to } 0.47], k = 5$                                                                                                                                                                                                                                                                                                                                                 |
|                                     | <input checked="" type="checkbox"/> Psychosocial Outcomes                                             |                                                                                                    |                                                                                                                                                                                                                                                                                                                              |                                                                                                                                                                                                                                                                                                                                |                                                                                                                                                                                                                                                                                                                                                                                                                                                                                                                                                                                                                                                                                                                                                                                                                                                 |
|                                     | Older Adults with mNCD/Dementia:                                                                      |                                                                                                    |                                                                                                                                                                                                                                                                                                                              |                                                                                                                                                                                                                                                                                                                                |                                                                                                                                                                                                                                                                                                                                                                                                                                                                                                                                                                                                                                                                                                                                                                                                                                                 |
|                                     | Depression:<br>direct comparison<br>subgroup analysis<br><br>Participants' Mood:<br>subgroup analysis | García-Casal et al.<br>2017 [11]<br><br>Chan et al. 2020 [2]<br><br>Bahar-Fuchs et al.<br>2019 [5] | <input checked="" type="checkbox"/> COG <input checked="" type="checkbox"/> PHYS <input type="checkbox"/> DUAL<br><input checked="" type="checkbox"/> COG <input type="checkbox"/> PHYS <input type="checkbox"/> DUAL<br><input checked="" type="checkbox"/> COG <input type="checkbox"/> PHYS <input type="checkbox"/> DUAL | computer based vs. not<br><br>pooled estimate*<br>computerized training*<br>cognitive rehabilitation*<br>cognitive stimulation*<br>between-group difference<br><br>pooled estimate<br>traditional training<br>augmented training<br>between-group difference                                                                   | $SMD^+ = -0.02, p = 0.95, 95\% \text{ CI } [-0.54 \text{ to } 0.50], k = 3$<br><br>$SMD^- = -0.54, p < 0.001, 95\% \text{ CI } [-0.77 \text{ to } -0.31], k = 36$<br>$SMD^- = -0.77, p < 0.001, 95\% \text{ CI } [-1.09 \text{ to } -0.44], k = 7$<br>$SMD^- = -0.32, p < 0.001, 95\% \text{ CI } [-0.57 \text{ to } -0.07], k = 16$<br>$SMD^- = -0.61, p < 0.001, 95\% \text{ CI } [-1.08 \text{ to } -0.15], k = 14$<br>NR<br><br>$SMD^+ = 0.72, p = 0.08, 95\% \text{ CI } [-0.10 \text{ to } 1.54], k = 8$<br>$SMD^+ = 0.9, p = 0.14, 95\% \text{ CI } [0.3 \text{ to } 2.1], k = 5$<br>$SMD^+ = 0.46, p = 0.52, 95\% \text{ CI } [-0.94 \text{ to } 1.86], k = 3$<br>$Chi^2 = 0.22, p = 0.64, I^2 = 0\%$                                                                                                                                   |
| Time<br>(session<br>duration)       | <input checked="" type="checkbox"/> Cognition                                                         |                                                                                                    |                                                                                                                                                                                                                                                                                                                              |                                                                                                                                                                                                                                                                                                                                |                                                                                                                                                                                                                                                                                                                                                                                                                                                                                                                                                                                                                                                                                                                                                                                                                                                 |
|                                     | Older Adults with mNCD/Dementia:                                                                      |                                                                                                    |                                                                                                                                                                                                                                                                                                                              |                                                                                                                                                                                                                                                                                                                                |                                                                                                                                                                                                                                                                                                                                                                                                                                                                                                                                                                                                                                                                                                                                                                                                                                                 |
|                                     | Global Cognition:<br>moderator analysis                                                               | Sanders et al. 2019<br>[26]                                                                        | <input type="checkbox"/> COG <input checked="" type="checkbox"/> PHYS <input type="checkbox"/> DUAL                                                                                                                                                                                                                          | moderator effect**<br>pooled estimate*<br>$\leq 30 \text{ min}^{**}$<br>post-hoc test $reference = \geq 45 \text{ min}^{**}$ $\downarrow^{**}$<br>31 – 45 min<br>post-hoc test $reference = \geq 45 \text{ min}$ $\rightarrow$<br>$\geq 45 \text{ min}$                                                                        | $F(2, 51) = 5.756, p < 0.01$<br>$g^+ = 0.22, p < 0.05, 95\% \text{ CI } [0.05 \text{ to } 0.39], k = 13$<br>$g^+ = 0.43, p < 0.01, 95\% \text{ CI } [0.24 \text{ to } 0.62]$<br>$\beta = 0.38, 95\% \text{ CI } [0.15 \text{ to } 0.60], p < 0.01$<br>$g^+ = 0.28, p > 0.05, 95\% \text{ CI } [-0.26 \text{ to } 0.82]$<br>$\beta = 0.23, 95\% \text{ CI } [-0.23 \text{ to } 0.78], p > 0.05$<br>$g^+ = -0.07, p > 0.05, 95\% \text{ CI } [-0.07 \text{ to } 0.17]$                                                                                                                                                                                                                                                                                                                                                                            |
|                                     | Mixed Healthy Older Adults and Older Adults with mNCD or Dementia:                                    |                                                                                                    |                                                                                                                                                                                                                                                                                                                              |                                                                                                                                                                                                                                                                                                                                |                                                                                                                                                                                                                                                                                                                                                                                                                                                                                                                                                                                                                                                                                                                                                                                                                                                 |
|                                     | Global Cognition:<br>bivariate correlation                                                            | Gomes-Osman et al.<br>2018 [46]                                                                    | <input type="checkbox"/> COG <input checked="" type="checkbox"/> PHYS <input type="checkbox"/> DUAL                                                                                                                                                                                                                          | session time (min) $\rightarrow$                                                                                                                                                                                                                                                                                               | $r = 0.20, p = 0.05 \text{ (n.s.)}$                                                                                                                                                                                                                                                                                                                                                                                                                                                                                                                                                                                                                                                                                                                                                                                                             |
|                                     | Healthy Older Adults:                                                                                 |                                                                                                    |                                                                                                                                                                                                                                                                                                                              |                                                                                                                                                                                                                                                                                                                                |                                                                                                                                                                                                                                                                                                                                                                                                                                                                                                                                                                                                                                                                                                                                                                                                                                                 |
|                                     | Complex Attention:<br>meta-regression                                                                 | Mansor et al. 2020 [3]                                                                             | <input type="checkbox"/> COG <input type="checkbox"/> PHYS <input checked="" type="checkbox"/> DUAL                                                                                                                                                                                                                          | sessions duration $\rightarrow$                                                                                                                                                                                                                                                                                                | coefficient (SE) = -0.01 (0.02), $p = 0.48$                                                                                                                                                                                                                                                                                                                                                                                                                                                                                                                                                                                                                                                                                                                                                                                                     |
|                                     | Processing Speed:<br>meta-regression                                                                  | Mansor et al. 2020 [3]                                                                             | <input type="checkbox"/> COG <input type="checkbox"/> PHYS <input checked="" type="checkbox"/> DUAL                                                                                                                                                                                                                          | sessions duration $\rightarrow$                                                                                                                                                                                                                                                                                                | coefficient (SE) = -0.01 (0.01), $p = 0.19$                                                                                                                                                                                                                                                                                                                                                                                                                                                                                                                                                                                                                                                                                                                                                                                                     |
|                                     | Executive Function:<br>moderator analysis                                                             | Chen et al. 2020 [20]                                                                              | <input type="checkbox"/> COG <input checked="" type="checkbox"/> PHYS <input checked="" type="checkbox"/> DUAL                                                                                                                                                                                                               | Session time<br>short ( $\leq 45 \text{ min}$ )*<br>moderate (45 – 60 min)*<br>long (60+ min)*                                                                                                                                                                                                                                 | $Q(2) = 0.21, p > 0.05$<br>$g^+ = 0.26, p < 0.05, 95\% \text{ CI } [0.18 \text{ to } 0.33], k = 50$<br>$g^+ = 0.26, p < 0.05, 95\% \text{ CI } [0.18 \text{ to } 0.33], k = 39$<br>$g^+ = 0.30, p < 0.05, 95\% \text{ CI } [0.15 \text{ to } 0.44], k = 10$                                                                                                                                                                                                                                                                                                                                                                                                                                                                                                                                                                                     |
|                                     | Inhibition:<br>meta-regression                                                                        | Mansor et al. 2020 [3]                                                                             | <input type="checkbox"/> COG <input type="checkbox"/> PHYS <input checked="" type="checkbox"/> DUAL                                                                                                                                                                                                                          | sessions duration $\rightarrow$                                                                                                                                                                                                                                                                                                | coefficient (SE) = -0.00 (0.01), $p = 0.60$                                                                                                                                                                                                                                                                                                                                                                                                                                                                                                                                                                                                                                                                                                                                                                                                     |
|                                     | Reasoning:<br>meta-regression                                                                         | Mansor et al. 2020 [3]                                                                             | <input type="checkbox"/> COG <input type="checkbox"/> PHYS <input checked="" type="checkbox"/> DUAL                                                                                                                                                                                                                          | sessions duration $\rightarrow$                                                                                                                                                                                                                                                                                                | coefficient (SE) = -0.02 (0.02), $p = 0.34$                                                                                                                                                                                                                                                                                                                                                                                                                                                                                                                                                                                                                                                                                                                                                                                                     |
|                                     | Shifting:<br>meta-regression                                                                          | Mansor et al. 2020 [3]                                                                             | <input type="checkbox"/> COG <input type="checkbox"/> PHYS <input checked="" type="checkbox"/> DUAL                                                                                                                                                                                                                          | sessions duration $\rightarrow$                                                                                                                                                                                                                                                                                                | coefficient (SE) = -0.01 (0.01), $p = 0.13$                                                                                                                                                                                                                                                                                                                                                                                                                                                                                                                                                                                                                                                                                                                                                                                                     |
|                                     | Updating:<br>meta-regression                                                                          | Mansor et al. 2020 [3]                                                                             | <input type="checkbox"/> COG <input type="checkbox"/> PHYS <input checked="" type="checkbox"/> DUAL                                                                                                                                                                                                                          | sessions duration $\rightarrow$                                                                                                                                                                                                                                                                                                | coefficient (SE) = 0.01 (0.01), $p = 0.25$                                                                                                                                                                                                                                                                                                                                                                                                                                                                                                                                                                                                                                                                                                                                                                                                      |
|                                     | Global Cognition:<br>moderator analysis<br><br>subgroup analysis<br><br>moderator analysis            | Sanders et al. 2019<br>[26]<br><br>Jia et al. 2019 [23]<br><br>Northey et al. 2018<br>[30]         | <input type="checkbox"/> COG <input checked="" type="checkbox"/> PHYS <input type="checkbox"/> DUAL<br><input type="checkbox"/> COG <input checked="" type="checkbox"/> PHYS <input type="checkbox"/> DUAL<br><input type="checkbox"/> COG <input checked="" type="checkbox"/> PHYS <input checked="" type="checkbox"/> DUAL | moderator effect<br>pooled estimate**<br>$\leq 30 \text{ min}$<br>31 – 45 min<br>$\geq 45 \text{ min}^{**}$<br>pooled estimate**<br>up to 30 min/session* $\downarrow^*$<br>> 30 min/session*<br>between-group difference*<br>moderator effect** $\uparrow^{**}$<br>pooled estimate**<br>$\leq 45 \text{ min}$<br>46 – 59 min* | $F(3, 129) = 0.905, p > 0.05$<br>$g^+ = 0.26, p < 0.01, 95\% \text{ CI } [0.15 \text{ to } 0.37], k = 23$<br>$g^+ = 0.22, p > 0.05, 95\% \text{ CI } [-0.03 \text{ to } 0.47]$<br>$g^+ = 0.11, p > 0.05, 95\% \text{ CI } [-0.16 \text{ to } 0.38]$<br>$g^+ = 0.31, p < 0.01, 95\% \text{ CI } [0.16 \text{ to } 0.45]$<br>$SMD^+ = 1.12, p < 0.001, 95\% \text{ CI } [0.66 \text{ to } 1.59], k = 13$<br>$SMD^+ = 1.92, 95\% \text{ CI } [1.55 \text{ to } 2.30], k = 6$<br>$SMD^+ = 0.34, 95\% \text{ CI } [0.08 \text{ to } 0.61], k = 7$<br>NR, but no overlap of CI<br>$Q_3 = 27.83, p < 0.01$<br>$SMD^+ = 0.29, p < 0.01, 95\% \text{ CI } [0.17 \text{ to } 0.41], k = 36$<br>$SMD^+ = 0.09, p > 0.05, 95\% \text{ CI } [-0.28 \text{ to } 0.46], n = 36$<br>$SMD^+ = 0.31, p < 0.05, 95\% \text{ CI } [0.16 \text{ to } 0.46], n = 263$ |

|                                             |                                                                                                                |                                                                               |                                                                                                                                                                                                                                                                                                                   |                                                                                                                  |             |                                                                                                                                                                                                                                                                                                                                                                                                                                                                                                                                                                                                      |
|---------------------------------------------|----------------------------------------------------------------------------------------------------------------|-------------------------------------------------------------------------------|-------------------------------------------------------------------------------------------------------------------------------------------------------------------------------------------------------------------------------------------------------------------------------------------------------------------|------------------------------------------------------------------------------------------------------------------|-------------|------------------------------------------------------------------------------------------------------------------------------------------------------------------------------------------------------------------------------------------------------------------------------------------------------------------------------------------------------------------------------------------------------------------------------------------------------------------------------------------------------------------------------------------------------------------------------------------------------|
| Time<br>(session<br>duration;<br>continued) | moderator analysis                                                                                             | Mewborn et al. 2017 [13]                                                      | <input checked="" type="checkbox"/> COG <input type="checkbox"/> PHYS <input type="checkbox"/> DUAL                                                                                                                                                                                                               | ≥ 60 min<br>moderator effect**<br>pooled estimate**<br>> 0.5 h**<br>< 0.5 h**                                    | ↓**         | SMD <sup>+</sup> = 0.33, p > 0.05, 95 % CI [-0.04 to 0.65], n = 24<br>Q = 885.04, p = 0.001<br>g <sup>+</sup> = 0.298, p < 0.001, 95 % CI [0.25 to 0.35], k = 279<br>g <sup>+</sup> = 0.302, p < 0.001, 95 % CI [0.25 to 0.36], k = 245<br>g <sup>+</sup> = 0.316, p < 0.001, 95 % CI [0.17 to 0.47], k = 29<br>g <sup>+</sup> = 0.22, p < 0.001, 95 % CI [0.15 to 0.29], k = 52<br>g <sup>+</sup> = 0.15, p < 0.05, 95 % CI [0.00 to 0.31], k = 13<br>g <sup>+</sup> = 0.24, p < 0.05, 95 % CI [0.14 to 0.34], k = 29<br>g <sup>+</sup> = 0.23, p < 0.05, 95 % CI [0.06 to 0.40], k = 8<br>p = 0.62 |
|                                             | subgroup analysis                                                                                              | Lampit et al. 2014 [17]                                                       | <input checked="" type="checkbox"/> COG <input type="checkbox"/> PHYS <input type="checkbox"/> DUAL                                                                                                                                                                                                               | pooled estimate**<br>< 30 min<br>31 – 60 min<br>> 60 min<br>between-group difference                             | →           |                                                                                                                                                                                                                                                                                                                                                                                                                                                                                                                                                                                                      |
|                                             | Learning and Memory:<br>meta-regression                                                                        | Mansor et al. 2020 [3]                                                        | <input type="checkbox"/> COG <input type="checkbox"/> PHYS <input checked="" type="checkbox"/> DUAL                                                                                                                                                                                                               | sessions duration**                                                                                              | ↓**         | coefficient (SE) = -0.03 (0.01), p = 0.03                                                                                                                                                                                                                                                                                                                                                                                                                                                                                                                                                            |
|                                             | <input checked="" type="checkbox"/> Brain / Neurochemicals / HRV                                               |                                                                               |                                                                                                                                                                                                                                                                                                                   |                                                                                                                  |             |                                                                                                                                                                                                                                                                                                                                                                                                                                                                                                                                                                                                      |
|                                             | Healthy Older Adults:                                                                                          |                                                                               |                                                                                                                                                                                                                                                                                                                   |                                                                                                                  |             |                                                                                                                                                                                                                                                                                                                                                                                                                                                                                                                                                                                                      |
|                                             | Heart Rate Variability:<br>ST-SDNN<br>meta-regression<br>RMSSD<br>meta-regression<br>HF-HRV<br>meta-regression | Raffin et al. 2019 [25]<br>Raffin et al. 2019 [25]<br>Raffin et al. 2019 [25] | <input type="checkbox"/> COG <input checked="" type="checkbox"/> PHYS <input type="checkbox"/> DUAL<br><input type="checkbox"/> COG <input checked="" type="checkbox"/> PHYS <input type="checkbox"/> DUAL<br><input type="checkbox"/> COG <input checked="" type="checkbox"/> PHYS <input type="checkbox"/> DUAL | training duration<br>training duration<br>training duration                                                      | →<br>→<br>→ | coefficient (SE) = 0.003 (0.008), p = 0.760<br>coefficient (SE) = 0.003 (0.012), p = 0.829<br>coefficient (SE) = 0.008 (0.006), p = 0.152                                                                                                                                                                                                                                                                                                                                                                                                                                                            |
|                                             | <input type="checkbox"/> Physical Outcomes, Mobility, and Activities of Daily Living                           |                                                                               |                                                                                                                                                                                                                                                                                                                   |                                                                                                                  |             |                                                                                                                                                                                                                                                                                                                                                                                                                                                                                                                                                                                                      |
|                                             |                                                                                                                |                                                                               |                                                                                                                                                                                                                                                                                                                   |                                                                                                                  |             |                                                                                                                                                                                                                                                                                                                                                                                                                                                                                                                                                                                                      |
|                                             | <input type="checkbox"/> Psychosocial Outcomes                                                                 |                                                                               |                                                                                                                                                                                                                                                                                                                   |                                                                                                                  |             |                                                                                                                                                                                                                                                                                                                                                                                                                                                                                                                                                                                                      |
|                                             |                                                                                                                |                                                                               |                                                                                                                                                                                                                                                                                                                   |                                                                                                                  |             |                                                                                                                                                                                                                                                                                                                                                                                                                                                                                                                                                                                                      |
| Duration<br>(of<br>intervention)            | <input checked="" type="checkbox"/> Cognition                                                                  |                                                                               |                                                                                                                                                                                                                                                                                                                   |                                                                                                                  |             |                                                                                                                                                                                                                                                                                                                                                                                                                                                                                                                                                                                                      |
|                                             | Older Adults with mNCD/Dementia:                                                                               |                                                                               |                                                                                                                                                                                                                                                                                                                   |                                                                                                                  |             |                                                                                                                                                                                                                                                                                                                                                                                                                                                                                                                                                                                                      |
|                                             | Global Cognition:<br>subgroup-analysis                                                                         | Bahar-Fuchs et al. 2019 [5]                                                   | <input checked="" type="checkbox"/> COG <input type="checkbox"/> PHYS <input type="checkbox"/> DUAL                                                                                                                                                                                                               | pooled estimate<br>≤ 3 months*<br>> 3 months*                                                                    |             | SMD <sup>+</sup> = 0.42, p < 0.0001, 95 % CI [0.23 to 0.61], k = 27<br>SMD <sup>+</sup> = 0.38, p = 0.95, 95 % CI [0.18 to 0.58], k = 21<br>SMD <sup>+</sup> = 0.54, p = 0.02, 95 % CI [0.07 to 1.01], k = 6<br>Chi <sup>2</sup> = 0.38, p = 0.54, I <sup>2</sup> = 0 %                                                                                                                                                                                                                                                                                                                              |
|                                             | subgroup-analysis                                                                                              | Wu et al. 2019 [43]                                                           | <input type="checkbox"/> COG <input checked="" type="checkbox"/> PHYS <input checked="" type="checkbox"/> DUAL                                                                                                                                                                                                    | between-group diff.<br>pooled estimate**<br>0 – 12 weeks*<br>13 – 14 weeks*<br>> 24 weeks*                       |             | SMD <sup>+</sup> = 0.92, p < 0.001, 95 % CI [0.33 to 0.59], k = 13<br>SMD <sup>+</sup> = 1.74, p = 0.03, 95 % CI [0.18 to 3.29], k = 4<br>SMD <sup>+</sup> = 0.46, p = 0.04, 95 % CI [0.02 to 0.90], k = 6<br>SMD <sup>+</sup> = 0.58, p = 0.05, 95 % CI [0.01 to 1.15], k = 3                                                                                                                                                                                                                                                                                                                       |
|                                             | moderator analysis                                                                                             | Sanders et al. 2019 [26]                                                      | <input type="checkbox"/> COG <input checked="" type="checkbox"/> PHYS <input type="checkbox"/> DUAL                                                                                                                                                                                                               | between-group difference<br>moderator effect<br>pooled estimate*<br>4 – 12 weeks<br>13 – 24 weeks*<br>≥ 24 weeks | →<br>→      | p = 0.30; I <sup>2</sup> = 17 %<br>F(2, 51) = 1.259, p > 0.05<br>g <sup>+</sup> = 0.22, p < 0.05, 95 % CI [0.05 to 0.39], k = 13<br>g <sup>+</sup> = 0.29, p > 0.05, 95 % CI [-0.01 to 0.58]<br>g <sup>+</sup> = 0.34, p < 0.05, 95 % CI [0.05 to 0.53]<br>g <sup>+</sup> = 0.10, p > 0.05, 95 % CI [-0.16 to 0.36]                                                                                                                                                                                                                                                                                  |
|                                             | Learning & Memory:<br>subgroup-analysis                                                                        | Bahar-Fuchs et al. 2019 [5]                                                   | <input checked="" type="checkbox"/> COG <input type="checkbox"/> PHYS <input type="checkbox"/> DUAL                                                                                                                                                                                                               | pooled estimate<br>≤ 3 months<br>> 3 months                                                                      |             | SMD <sup>+</sup> = 0.74, p < 0.0001, 95 % CI [0.37 to 1.12], k = 18<br>SMD <sup>+</sup> = 0.03, p = 0.84, 95 % CI [-0.23 to 0.28], k = 9<br>SMD <sup>+</sup> = 0.66, p = 0.07, 95 % CI [-0.05 to 1.38], k = 3<br>Chi <sup>2</sup> = 2.71, p = 0.10, I <sup>2</sup> = 63.13 %                                                                                                                                                                                                                                                                                                                         |
|                                             | Language:<br>subgroup-analysis                                                                                 | Bahar-Fuchs et al. 2019 [5]                                                   | <input checked="" type="checkbox"/> COG <input type="checkbox"/> PHYS <input type="checkbox"/> DUAL                                                                                                                                                                                                               | pooled estimate<br>≤ 3 months*<br>> 3 months*<br>between-group diff.                                             | →           | SMD <sup>+</sup> = 0.22, p = 0.13, 95 % CI [-0.07 to 0.50], k = 12<br>SMD <sup>+</sup> = 0.75, p = 0.95, 95 % CI [0.29 to 1.21], k = 15<br>SMD <sup>+</sup> = 0.76, p = 0.95, 95 % CI [0.26 to 1.26], k = 3<br>Chi <sup>2</sup> = 0, p = 0.97, I <sup>2</sup> = 0 %                                                                                                                                                                                                                                                                                                                                  |
|                                             | Mixed Healthy Older Adults and Older Adults with mNCD or Dementia:                                             |                                                                               |                                                                                                                                                                                                                                                                                                                   |                                                                                                                  |             |                                                                                                                                                                                                                                                                                                                                                                                                                                                                                                                                                                                                      |
|                                             | Global Cognition:<br>moderator analysis                                                                        | Gavelin et al. 2021 [39]                                                      | <input type="checkbox"/> COG <input type="checkbox"/> PHYS <input checked="" type="checkbox"/> DUAL                                                                                                                                                                                                               | moderator effect<br>pooled estimate*<br>≤ 12 weeks**<br>> 12 weeks**                                             | →           | F(1, 18) = 0.32, p = 0.58<br>g <sup>+</sup> = 0.22, p < 0.05, 95 % CI [0.14 to 0.30], k = 41<br>g <sup>+</sup> = 0.24, p < 0.001, 95 % CI [0.13 to 0.36], k = 25<br>g <sup>+</sup> = 0.19, p = 0.003, 95 % CI [0.13 to 0.30], k = 16                                                                                                                                                                                                                                                                                                                                                                 |
|                                             | bivariate correlation                                                                                          | Gomes-Osman et al. 2018 [46]                                                  | <input type="checkbox"/> COG <input checked="" type="checkbox"/> PHYS <input type="checkbox"/> DUAL                                                                                                                                                                                                               | duration (weeks)                                                                                                 | →           | r = 0.15, p = 0.12                                                                                                                                                                                                                                                                                                                                                                                                                                                                                                                                                                                   |
|                                             | Healthy Older Adults:                                                                                          |                                                                               |                                                                                                                                                                                                                                                                                                                   |                                                                                                                  |             |                                                                                                                                                                                                                                                                                                                                                                                                                                                                                                                                                                                                      |
|                                             | Global Cognition:<br>meta-regression                                                                           | Bonnechère et al. 2020 [1]                                                    | <input checked="" type="checkbox"/> COG <input type="checkbox"/> PHYS <input type="checkbox"/> DUAL                                                                                                                                                                                                               | meta-regression                                                                                                  | →           | β = -0.007, SE = 0.006, p = 0.24                                                                                                                                                                                                                                                                                                                                                                                                                                                                                                                                                                     |
|                                             | meta-regression                                                                                                | Biazus-Sehn et al. 2020 [19]                                                  | <input type="checkbox"/> COG <input checked="" type="checkbox"/> PHYS <input checked="" type="checkbox"/> DUAL                                                                                                                                                                                                    | length of trial                                                                                                  | →           | β = -0.0042, R <sup>2</sup> = 0, p = 0.52                                                                                                                                                                                                                                                                                                                                                                                                                                                                                                                                                            |

|                                                                    |                                                                                                 |                                                                                                     |                                                                                                                |                                                                                                                              |                                                                                                                                                                                                                                                                                      |                                                                                                                                                                                                                                                                                                                                                   |  |
|--------------------------------------------------------------------|-------------------------------------------------------------------------------------------------|-----------------------------------------------------------------------------------------------------|----------------------------------------------------------------------------------------------------------------|------------------------------------------------------------------------------------------------------------------------------|--------------------------------------------------------------------------------------------------------------------------------------------------------------------------------------------------------------------------------------------------------------------------------------|---------------------------------------------------------------------------------------------------------------------------------------------------------------------------------------------------------------------------------------------------------------------------------------------------------------------------------------------------|--|
| Duration<br>(of<br>intervention;<br>continued)                     | moderator analysis                                                                              | Sanders et al. 2019 [26]                                                                            | <input type="checkbox"/> COG <input checked="" type="checkbox"/> PHYS <input type="checkbox"/> DUAL            | moderator effect<br>pooled estimate**<br>4 – 12 weeks**<br>13 – 24 weeks<br>≥ 24 weeks*                                      | →                                                                                                                                                                                                                                                                                    | $F(3, 128) = 1.487, p > 0.05$<br>$g^+ = 0.26, p < 0.01, 95\% \text{ CI } [0.15 \text{ to } 0.37], k = 23$<br>$g^+ = 0.36, p < 0.01, 95\% \text{ CI } [0.17 \text{ to } 0.54]$<br>$g^+ = 0.14, p > 0.05, 95\% \text{ CI } [-0.04 \text{ to } 0.32]$<br>$g^+ = 0.29, p < 0.05, 95\% \text{ CI } [0.06 \text{ to } 0.52]$                            |  |
|                                                                    | moderator analysis                                                                              | Northey et al. 2018 [30]                                                                            | <input type="checkbox"/> COG <input checked="" type="checkbox"/> PHYS <input checked="" type="checkbox"/> DUAL | moderator effect**<br>pooled estimate**<br>4 – 12 weeks<br>13 – 24 weeks<br>≥ 24 weeks                                       | →                                                                                                                                                                                                                                                                                    | $Q_3 = 23.32, p < 0.01$<br>$SMD^+ = 0.29, p < 0.01, 95\% \text{ CI } [0.17 \text{ to } 0.41], k = 36$<br>$SMD^+ = 0.31, p < 0.05, 95\% \text{ CI } [0.09 \text{ to } 0.54], n = 78$<br>$SMD^+ = 0.28, p < 0.05, 95\% \text{ CI } [0.10 \text{ to } 0.47], n = 170$<br>$SMD^+ = 0.27, p < 0.05, 95\% \text{ CI } [0.03 \text{ to } 0.52], n = 86$  |  |
|                                                                    | subgroup analysis                                                                               | Stanmore et al. 2017 [44]                                                                           | <input type="checkbox"/> COG <input type="checkbox"/> PHYS <input checked="" type="checkbox"/> DUAL            | pooled estimate**<br>< 12 weeks*<br>> 12 weeks*                                                                              |                                                                                                                                                                                                                                                                                      | $g^+ = 0.436, p = 0.01, 95\% \text{ CI } [0.18 \text{ to } 0.69], k = 17$<br>$g^+ = 0.255, p = 0.030, 95\% \text{ CI } [0.02 \text{ to } 0.49]$<br>$g^+ = 0.759, p = 0.005, 95\% \text{ CI } [0.23 \text{ to } 1.29]$                                                                                                                             |  |
|                                                                    | moderator analysis                                                                              | Toril et al. 2014 [16]                                                                              | <input checked="" type="checkbox"/> COG <input type="checkbox"/> PHYS <input type="checkbox"/> DUAL            | between-group difference<br>moderator effect*<br>pooled estimate**<br>short (1 – 6 weeks)**<br>long (7 – 12 weeks)**         | →<br>↓*                                                                                                                                                                                                                                                                              | $p = 0.086$<br>$Q(1) = 3.73, p = 0.05$<br>$d^+ = 0.37, p < 0.01, 95\% \text{ CI } [0.26 \text{ to } 0.48]$<br>$d^+ = 0.49, p < 0.01, 95\% \text{ CI } [0.32 \text{ to } 0.67]$<br>$d^+ = 0.26, p < 0.01, 95\% \text{ CI } [0.09 \text{ to } 0.43]$                                                                                                |  |
|                                                                    | Executive Function:<br>moderator analysis                                                       | Chen et al. 2020 [20]                                                                               | <input type="checkbox"/> COG <input checked="" type="checkbox"/> PHYS <input checked="" type="checkbox"/> DUAL | Length of Intervention*<br>short (1 – 3 months)*<br>medium (4 – 6 months)*<br>long (> 6 months)*                             | ↓*                                                                                                                                                                                                                                                                                   | $Q(2) = 16.64, p < 0.05$<br>$g^+ = 0.32, p < 0.05, 95\% \text{ CI } [0.23 \text{ to } 0.41], k = 29$<br>$g^+ = 0.26, p < 0.05, 95\% \text{ CI } [0.18 \text{ to } 0.34], k = 49$<br>$g^+ = 0.09, p < 0.05, 95\% \text{ CI } [0.01 \text{ to } 0.17], k = 29$                                                                                      |  |
|                                                                    | meta-regression                                                                                 | Biazus-Sehn et al. 2020 [19]                                                                        | <input type="checkbox"/> COG <input checked="" type="checkbox"/> PHYS <input checked="" type="checkbox"/> DUAL | length of trial*                                                                                                             | ↓*                                                                                                                                                                                                                                                                                   | $\beta = -0.0035, R^2 = 0.32, p < 0.047$                                                                                                                                                                                                                                                                                                          |  |
|                                                                    | subgroup analysis                                                                               | Jia et al. 2019 [23]                                                                                | <input type="checkbox"/> COG <input checked="" type="checkbox"/> PHYS <input type="checkbox"/> DUAL            | pooled estimate**<br>up to 16 weeks*<br>> 16 weeks*                                                                          | ↑                                                                                                                                                                                                                                                                                    | $SMD^+ = 1.12, p < 0.001, 95\% \text{ CI } [0.66 \text{ to } 1.59], k = 13$<br>$SMD^+ = 0.91, 95\% \text{ CI } [0.40 \text{ to } 1.43], k = 9$<br>$SMD^+ = 1.12, 95\% \text{ CI } [0.66 \text{ to } 1.59], k = 4$                                                                                                                                 |  |
|                                                                    | <input type="checkbox"/> Brain / Neurochemicals / HRV                                           |                                                                                                     |                                                                                                                |                                                                                                                              |                                                                                                                                                                                                                                                                                      |                                                                                                                                                                                                                                                                                                                                                   |  |
|                                                                    |                                                                                                 |                                                                                                     |                                                                                                                |                                                                                                                              |                                                                                                                                                                                                                                                                                      |                                                                                                                                                                                                                                                                                                                                                   |  |
|                                                                    | <input checked="" type="checkbox"/> Physical Outcomes, Mobility, and Activities of Daily Living |                                                                                                     |                                                                                                                |                                                                                                                              |                                                                                                                                                                                                                                                                                      |                                                                                                                                                                                                                                                                                                                                                   |  |
| Mixed Healthy Older Adults and Older Adults with mNCD or Dementia: |                                                                                                 |                                                                                                     |                                                                                                                |                                                                                                                              |                                                                                                                                                                                                                                                                                      |                                                                                                                                                                                                                                                                                                                                                   |  |
| Global Cognition:<br>moderator analysis                            | Gavelin et al. 2021 [39]                                                                        | <input type="checkbox"/> COG <input type="checkbox"/> PHYS <input checked="" type="checkbox"/> DUAL | moderator effect<br>pooled estimate*<br>≤ 12 weeks**<br>> 12 weeks                                             | ↓*                                                                                                                           | $F(2, 18) = 4.52, p = 0.048$<br>$g^+ = 0.25, p < 0.05, 95\% \text{ CI } [0.13 \text{ to } 0.37], k = 32$<br>$g^+ = 0.33, p < 0.001, 95\% \text{ CI } [0.17 \text{ to } 0.48], k = 21$<br>$g^+ = 0.09, p = 0.31, 95\% \text{ CI } [-0.10 \text{ to } 0.28], k = 11$                   |                                                                                                                                                                                                                                                                                                                                                   |  |
| <input checked="" type="checkbox"/> Psychosocial Outcomes          |                                                                                                 |                                                                                                     |                                                                                                                |                                                                                                                              |                                                                                                                                                                                                                                                                                      |                                                                                                                                                                                                                                                                                                                                                   |  |
| Older Adults with mNCD/Dementia:                                   |                                                                                                 |                                                                                                     |                                                                                                                |                                                                                                                              |                                                                                                                                                                                                                                                                                      |                                                                                                                                                                                                                                                                                                                                                   |  |
| Neuropsych. Sympt.:<br>subgroup analysis                           | Bahar-Fuchs et al. 2019 [5]                                                                     | <input checked="" type="checkbox"/> COG <input type="checkbox"/> PHYS <input type="checkbox"/> DUAL | pooled estimate<br>≤ 3 months<br>> 3 months<br>between-group diff.                                             | →                                                                                                                            | $SMD^+ = 0.44, p = 0.27, 95\% \text{ CI } [-0.34 \text{ to } 1.22], k = 6$<br>$SMD^+ = 0.66, p = 0.59, 95\% \text{ CI } [-1.70 \text{ to } 3.02], k = 3$<br>$SMD^+ = 0.12, p = 0.57, 95\% \text{ CI } [-0.29 \text{ to } 0.53], k = 3$<br>$\text{Chi}^2 = 0.19, p = 0.66, I^2 = 0\%$ |                                                                                                                                                                                                                                                                                                                                                   |  |
| Volume /<br>Dose                                                   | <input checked="" type="checkbox"/> Cognition                                                   |                                                                                                     |                                                                                                                |                                                                                                                              |                                                                                                                                                                                                                                                                                      |                                                                                                                                                                                                                                                                                                                                                   |  |
|                                                                    | Older Adults with mNCD/Dementia:                                                                |                                                                                                     |                                                                                                                |                                                                                                                              |                                                                                                                                                                                                                                                                                      |                                                                                                                                                                                                                                                                                                                                                   |  |
|                                                                    | Global Cognition:<br>subgroup analysis                                                          | Law et al. 2020 [22]                                                                                | <input type="checkbox"/> COG <input checked="" type="checkbox"/> PHYS <input type="checkbox"/> DUAL            | pooled estimate*<br>tot. time <sub>training</sub> ≤ 24h*<br>tot. time <sub>training</sub> > 24h*<br>between-group difference |                                                                                                                                                                                                                                                                                      | $SMD^+ = 0.44, 95\% \text{ CI } [0.27 \text{ to } 0.61], k = 26$<br>$SMD^+ = 0.23, 95\% \text{ CI } [0.07 \text{ to } 0.40], k = 13$<br>$SMD^+ = 0.66, 95\% \text{ CI } [0.32 \text{ to } 0.99], k = 12$<br>NR                                                                                                                                    |  |
|                                                                    | meta-regression                                                                                 | Biazus-Sehn et al. 2020 [19]                                                                        | <input type="checkbox"/> COG <input checked="" type="checkbox"/> PHYS <input checked="" type="checkbox"/> DUAL | volume (min/week)*                                                                                                           | ↓*                                                                                                                                                                                                                                                                                   | $\beta = -0.0048, R^2 = 0.33, p = 0.044$                                                                                                                                                                                                                                                                                                          |  |
|                                                                    | subgroup-analysis                                                                               | Wu et al. 2019 [43]                                                                                 | <input type="checkbox"/> COG <input checked="" type="checkbox"/> PHYS <input checked="" type="checkbox"/> DUAL | pooled estimate**<br>low (< 60min/week)<br>mod. (60–120 min/week)*<br>high (> 120min/week)<br>between-group difference       | →                                                                                                                                                                                                                                                                                    | $SMD^+ = 0.92, p < 0.001, 95\% \text{ CI } [0.33 \text{ to } 0.59], k = 13$<br>$SMD^+ = 0.41, p = 0.16, 95\% \text{ CI } [-0.16 \text{ to } 0.97], k = 2$<br>$SMD^+ = 1.15, p = 0.006, 95\% \text{ CI } [0.34 \text{ to } 1.97], k = 8$<br>$SMD^+ = 0.15, p = 0.51, 95\% \text{ CI } [-0.29 \text{ to } 0.59], k = 3$<br>$p = 0.11; I^2 = 55.5\%$ |  |
|                                                                    | subgroup analysis                                                                               | Jia et al. 2019 [23]                                                                                | <input type="checkbox"/> COG <input checked="" type="checkbox"/> PHYS <input type="checkbox"/> DUAL            | pooled estimate**<br>up to 2h/week*<br>more than 2h/week*<br>between-group difference                                        |                                                                                                                                                                                                                                                                                      | $SMD^+ = 1.12, p < 0.001, 95\% \text{ CI } [0.66 \text{ to } 1.59], k = 13$<br>$SMD^+ = 1.74, 95\% \text{ CI } [1.32 \text{ to } 2.15], k = 5$<br>$SMD^+ = 0.76, 95\% \text{ CI } [0.27 \text{ to } 1.24], k = 8$<br>NR                                                                                                                           |  |
|                                                                    | subgroup analysis                                                                               | Zhang et al. 2019 [8]                                                                               | <input checked="" type="checkbox"/> COG <input type="checkbox"/> PHYS <input type="checkbox"/> DUAL            | pooled estimate<br>≤ 10 hours<br>> 10 hours<br>between-group difference                                                      |                                                                                                                                                                                                                                                                                      | $g^+ = 0.23, p = 0.09, 95\% \text{ CI } [-0.04 \text{ to } 0.50], k = 9$<br>$g^+ = 0.30, p = 0.06, 95\% \text{ CI } [-0.01 \text{ to } 0.61], k = 4$<br>$g^+ = 0.20, p = 0.44, 95\% \text{ CI } [-0.31 \text{ to } 0.71], k = 5$<br>$\text{Chi}^2 = 0.11, p = 0.74, I^2 = 0\%$                                                                    |  |
|                                                                    | meta-regression                                                                                 | Shermann et al. 2017 [14]                                                                           | <input checked="" type="checkbox"/> COG <input type="checkbox"/> PHYS <input type="checkbox"/> DUAL            | volume (in hours)                                                                                                            |                                                                                                                                                                                                                                                                                      | Coefficient = -0.0005, Z-value = -0.07, p = 0.9412                                                                                                                                                                                                                                                                                                |  |
|                                                                    | Attention:                                                                                      |                                                                                                     |                                                                                                                |                                                                                                                              |                                                                                                                                                                                                                                                                                      |                                                                                                                                                                                                                                                                                                                                                   |  |

|                           |                                                                                                 |                              |                                                                                                     |                                                                                                                            |                                                                                                                                                                                                                                                                                                                                                                                                                     |
|---------------------------|-------------------------------------------------------------------------------------------------|------------------------------|-----------------------------------------------------------------------------------------------------|----------------------------------------------------------------------------------------------------------------------------|---------------------------------------------------------------------------------------------------------------------------------------------------------------------------------------------------------------------------------------------------------------------------------------------------------------------------------------------------------------------------------------------------------------------|
| Volume / Dose (continued) | subgroup analysis                                                                               | Law et al. 2020 [22]         | <input type="checkbox"/> COG <input checked="" type="checkbox"/> PHYS <input type="checkbox"/> DUAL | pooled estimate<br>tot. time <sub>training</sub> ≤ 24h<br>tot. time <sub>training</sub> > 24h<br>between-group difference  | SMD <sup>+</sup> = 0.04, p = 0.52, 95 % CI [-0.07 to 0.15], k = 15<br>SMD <sup>+</sup> = 0.05, 95 % CI [-0.09 to 0.19], k = 10<br>SMD <sup>+</sup> = -0.01, 95 % CI [-0.28 to 0.25], k = 5<br>NR                                                                                                                                                                                                                    |
|                           | Executive Function:<br>Working Memory:<br>subgroup analysis                                     | Law et al. 2020 [22]         | <input type="checkbox"/> COG <input checked="" type="checkbox"/> PHYS <input type="checkbox"/> DUAL | pooled estimate<br>tot. time <sub>training</sub> ≤ 24h<br>between-group difference                                         | SMD <sup>+</sup> = 0.28, 95 % CI [0.04 to 0.52], k = 8<br>SMD <sup>+</sup> = 0.30, 95 % CI [0.02 to 0.58], k = 7<br>NR                                                                                                                                                                                                                                                                                              |
|                           | Learning and Memory:<br>subgroup analysis                                                       | Law et al. 2020 [22]         | <input type="checkbox"/> COG <input checked="" type="checkbox"/> PHYS <input type="checkbox"/> DUAL | pooled estimate<br>tot. time <sub>training</sub> ≤ 24h<br>between-group difference                                         | SMD <sup>+</sup> = 0.15, 95 % CI [-0.04 to 0.34], k = 11<br>SMD <sup>+</sup> = 0.16, 95 % CI [-0.04 to 0.36], k = 7<br>NR                                                                                                                                                                                                                                                                                           |
|                           | Language:<br>subgroup analysis                                                                  | Law et al. 2020 [22]         | <input type="checkbox"/> COG <input checked="" type="checkbox"/> PHYS <input type="checkbox"/> DUAL | pooled estimate<br>tot. time <sub>training</sub> ≤ 24h*<br>tot. time <sub>training</sub> > 24h<br>between-group difference | SMD <sup>+</sup> = 0.15, p = 0.11, 95 % CI [-0.03 to 0.34], k = 15<br><b>SMD<sup>+</sup> = 0.22, 95 % CI [0.02 to 0.42], k = 9</b><br>SMD <sup>+</sup> = 0.08, 95 % CI [-0.28 to 0.43], k = 5<br>NR                                                                                                                                                                                                                 |
|                           | Mixed Healthy Older Adults and Older Adults with mNCD or Dementia:                              |                              |                                                                                                     |                                                                                                                            |                                                                                                                                                                                                                                                                                                                                                                                                                     |
|                           | Global Cognition:<br>bivariate correlation                                                      | Gomes-Osman et al. 2018 [46] | <input type="checkbox"/> COG <input checked="" type="checkbox"/> PHYS <input type="checkbox"/> DUAL | tot. length of int.(hours)** ↑**                                                                                           | r = 0.24, p = 0.01                                                                                                                                                                                                                                                                                                                                                                                                  |
|                           | Healthy Older Adults:                                                                           |                              |                                                                                                     |                                                                                                                            |                                                                                                                                                                                                                                                                                                                                                                                                                     |
|                           | Global Cognition:<br>moderator analysis                                                         | Mewborn et al. 2017 [13]     | <input checked="" type="checkbox"/> COG <input type="checkbox"/> PHYS <input type="checkbox"/> DUAL | moderator effect*<br>pooled estimate**<br>> 20h**<br>< 20h**<br>> 20 sessions<br>< 20 session                              | ↑**<br>Q = 329.20, p = 0.035 AND Q = 885.04, p < 0.001<br>g <sup>+</sup> = 0.298, p < 0.001, 95 % CI [0.25 to 0.35], k = 279<br>g <sup>+</sup> = 0.341, p < 0.001, 95 % CI [0.23 to 0.45], k = 69<br>g <sup>+</sup> = 0.286, p < 0.001, 95 % CI [0.23 to 0.34], k = 208<br>g <sup>+</sup> = 0.329, p < 0.001, 95 % CI [0.24 to 0.42], k = 102<br>g <sup>+</sup> = 0.288, p < 0.001, 95 % CI [0.23 to 0.35], k = 172 |
|                           | subgroup analysis                                                                               | Lampit et al. 2014 [17]      | <input checked="" type="checkbox"/> COG <input type="checkbox"/> PHYS <input type="checkbox"/> DUAL | pooled estimate**<br>≤ 20 h*<br>> 20 h*<br>between-group difference →                                                      | g <sup>+</sup> = 0.22, p < 0.001, 95 % CI [0.15 to 0.29], k = 52<br>g <sup>+</sup> = 0.23, p < 0.05, 95 % CI [0.15 to 0.32], k = 36<br>g <sup>+</sup> = 0.20, p < 0.05, 95 % CI [0.07 to 0.33], k = 15<br>p = 0.69                                                                                                                                                                                                  |
|                           | Complex Attention:<br>meta-regression                                                           | Mansor et al. 2020 [3]       | <input type="checkbox"/> COG <input type="checkbox"/> PHYS <input checked="" type="checkbox"/> DUAL | total duration (h) →                                                                                                       | coefficient (SE) = -0.01 (0.02), p = 0.46                                                                                                                                                                                                                                                                                                                                                                           |
|                           | Processing Speed:<br>meta-regression                                                            | Mansor et al. 2020 [3]       | <input type="checkbox"/> COG <input type="checkbox"/> PHYS <input checked="" type="checkbox"/> DUAL | total duration (h) →                                                                                                       | coefficient (SE) = -0.01 (0.18), p = 0.18                                                                                                                                                                                                                                                                                                                                                                           |
|                           | Executive Function:<br>Inhibition:<br>meta-regression                                           | Mansor et al. 2020 [3]       | <input type="checkbox"/> COG <input type="checkbox"/> PHYS <input checked="" type="checkbox"/> DUAL | total duration (h) →                                                                                                       | coefficient (SE) = -0.01 (0.01), p = 0.29                                                                                                                                                                                                                                                                                                                                                                           |
|                           | Shifting:<br>meta-regression                                                                    | Mansor et al. 2020 [3]       | <input type="checkbox"/> COG <input type="checkbox"/> PHYS <input checked="" type="checkbox"/> DUAL | total duration (h)** ↓**                                                                                                   | coefficient (SE) = -0.04 (0.01), p < 0.01                                                                                                                                                                                                                                                                                                                                                                           |
|                           | Updating:<br>meta-regression                                                                    | Mansor et al. 2020 [3]       | <input type="checkbox"/> COG <input type="checkbox"/> PHYS <input checked="" type="checkbox"/> DUAL | total duration (h) →                                                                                                       | coefficient (SE) = 0.00 (0.1), p = 0.92                                                                                                                                                                                                                                                                                                                                                                             |
|                           | Reasoning:<br>meta-regression                                                                   | Mansor et al. 2020 [3]       | <input type="checkbox"/> COG <input type="checkbox"/> PHYS <input checked="" type="checkbox"/> DUAL | total duration (h) →                                                                                                       | coefficient (SE) = -0.02 (0.02), p = 0.24                                                                                                                                                                                                                                                                                                                                                                           |
|                           | Learning and Memory:<br>meta-regression                                                         | Mansor et al. 2020 [3]       | <input type="checkbox"/> COG <input type="checkbox"/> PHYS <input checked="" type="checkbox"/> DUAL | total duration (h) →                                                                                                       | coefficient (SE) = -0.03 (0.15), p = 0.07                                                                                                                                                                                                                                                                                                                                                                           |
|                           | <input checked="" type="checkbox"/> Brain / Neurochemicals / HRV                                |                              |                                                                                                     |                                                                                                                            |                                                                                                                                                                                                                                                                                                                                                                                                                     |
|                           | Healthy Older Adults:                                                                           |                              |                                                                                                     |                                                                                                                            |                                                                                                                                                                                                                                                                                                                                                                                                                     |
|                           | Heart Rate Variability:<br>ST-SDNN<br>meta-regression                                           | Raffin et al. 2019 [25]      | <input type="checkbox"/> COG <input checked="" type="checkbox"/> PHYS <input type="checkbox"/> DUAL | number of sessions →                                                                                                       | coefficient (SE) = 0.002 (0.002), p = 0.286                                                                                                                                                                                                                                                                                                                                                                         |
|                           | RMSSD<br>meta-regression                                                                        | Raffin et al. 2019 [25]      | <input type="checkbox"/> COG <input checked="" type="checkbox"/> PHYS <input type="checkbox"/> DUAL | number of sessions →                                                                                                       | coefficient (SE) = 0.000 (0.002), p = 0.948                                                                                                                                                                                                                                                                                                                                                                         |
|                           | HF-HRV<br>meta-regression                                                                       | Raffin et al. 2019 [25]      | <input type="checkbox"/> COG <input checked="" type="checkbox"/> PHYS <input type="checkbox"/> DUAL | number of sessions →                                                                                                       | coefficient (SE) = 0.002 (0.001), p = 0.134                                                                                                                                                                                                                                                                                                                                                                         |
|                           | <input checked="" type="checkbox"/> Physical Outcomes, Mobility, and Activities of Daily Living |                              |                                                                                                     |                                                                                                                            |                                                                                                                                                                                                                                                                                                                                                                                                                     |
|                           | Healthy Older Adults:                                                                           |                              |                                                                                                     |                                                                                                                            |                                                                                                                                                                                                                                                                                                                                                                                                                     |
|                           | Fall Rate<br>meta-regression                                                                    | Sherrington et al. 2017 [33] | <input type="checkbox"/> COG <input checked="" type="checkbox"/> PHYS <input type="checkbox"/> DUAL | hours per week of training<br>2+ hours/week<br>3+ hours/week* ↑*                                                           | RR <sup>-</sup> (95 % CI) = 0.98 (0.83 to 1.16), p = 0.83, ΔI <sup>2</sup> = - 6 %<br>RR <sup>-</sup> (95 % CI) = 0.77 (0.65 to 0.91), p = 0.003, ΔI <sup>2</sup> = 61 %                                                                                                                                                                                                                                            |
|                           | Funct. Exerc. Capacity:                                                                         |                              |                                                                                                     |                                                                                                                            |                                                                                                                                                                                                                                                                                                                                                                                                                     |

|                                   |                                                                                      |                             |                                                                                                     |                                                                                                                                                 |        |                                                                                                                                                                                                                                                                                                                                                                                          |
|-----------------------------------|--------------------------------------------------------------------------------------|-----------------------------|-----------------------------------------------------------------------------------------------------|-------------------------------------------------------------------------------------------------------------------------------------------------|--------|------------------------------------------------------------------------------------------------------------------------------------------------------------------------------------------------------------------------------------------------------------------------------------------------------------------------------------------------------------------------------------------|
| Volume /<br>Dose<br>(continued)   | subgroup analysis                                                                    | Howes et al. 2017 [45]      | <input type="checkbox"/> COG <input type="checkbox"/> PHYS <input checked="" type="checkbox"/> DUAL | pooled estimate**<br>< 120 min/week<br>> 120 min/week**<br>> 150 min/week*<br>subgroup difference                                               | ↑<br>→ | SMD <sup>+</sup> = 0.29, p = 0.01, 95 % CI [0.04 to 0.55], k = 7<br>SMD <sup>+</sup> = 0.10, p = 0.58, 95 % CI [-0.24 to 0.44], k = 2<br>SMD <sup>+</sup> = 0.53, p = 0.006, 95 % CI [0.15 to 0.90], k = 5<br>SMD <sup>+</sup> = 0.85, p = 0.01, 95 % CI [0.19 to 1.51], k = 2<br>p = 0.17, I <sup>2</sup> = 45.8 %                                                                      |
|                                   | <input checked="" type="checkbox"/> Psychosocial Outcomes                            |                             |                                                                                                     |                                                                                                                                                 |        |                                                                                                                                                                                                                                                                                                                                                                                          |
|                                   | Older Adults with mNCD/Dementia:                                                     |                             |                                                                                                     |                                                                                                                                                 |        |                                                                                                                                                                                                                                                                                                                                                                                          |
|                                   | Behavioral Problems:<br>subgroup analysis                                            | Law et al. 2020 [22]        | <input type="checkbox"/> COG <input checked="" type="checkbox"/> PHYS <input type="checkbox"/> DUAL | pooled estimate**<br>tot. time <sub>training</sub> ≤ 24h*<br>between-group difference                                                           |        | SMD <sup>+</sup> = 0.35, p = 0.01, 95 % CI [0.07 to 0.64], k = 9<br>SMD <sup>+</sup> = 0.28, 95 % CI [0.10 to 0.46], k = 6<br>NR                                                                                                                                                                                                                                                         |
| Progression<br>&<br>Periodization | <input type="checkbox"/> Cognition                                                   |                             |                                                                                                     |                                                                                                                                                 |        |                                                                                                                                                                                                                                                                                                                                                                                          |
|                                   |                                                                                      |                             |                                                                                                     |                                                                                                                                                 |        |                                                                                                                                                                                                                                                                                                                                                                                          |
|                                   |                                                                                      |                             |                                                                                                     |                                                                                                                                                 |        |                                                                                                                                                                                                                                                                                                                                                                                          |
|                                   | <input type="checkbox"/> Brain / Neurochemicals / HRV                                |                             |                                                                                                     |                                                                                                                                                 |        |                                                                                                                                                                                                                                                                                                                                                                                          |
|                                   |                                                                                      |                             |                                                                                                     |                                                                                                                                                 |        |                                                                                                                                                                                                                                                                                                                                                                                          |
|                                   |                                                                                      |                             |                                                                                                     |                                                                                                                                                 |        |                                                                                                                                                                                                                                                                                                                                                                                          |
|                                   | <input type="checkbox"/> Physical Outcomes, Mobility, and Activities of Daily Living |                             |                                                                                                     |                                                                                                                                                 |        |                                                                                                                                                                                                                                                                                                                                                                                          |
|                                   |                                                                                      |                             |                                                                                                     |                                                                                                                                                 |        |                                                                                                                                                                                                                                                                                                                                                                                          |
|                                   | <input type="checkbox"/> Psychosocial Outcomes                                       |                             |                                                                                                     |                                                                                                                                                 |        |                                                                                                                                                                                                                                                                                                                                                                                          |
|                                   |                                                                                      |                             |                                                                                                     |                                                                                                                                                 |        |                                                                                                                                                                                                                                                                                                                                                                                          |
|                                   |                                                                                      |                             |                                                                                                     |                                                                                                                                                 |        |                                                                                                                                                                                                                                                                                                                                                                                          |
| Variability /<br>Variation        | <input checked="" type="checkbox"/> Cognition                                        |                             |                                                                                                     |                                                                                                                                                 |        |                                                                                                                                                                                                                                                                                                                                                                                          |
|                                   | Healthy Older Adults:                                                                |                             |                                                                                                     |                                                                                                                                                 |        |                                                                                                                                                                                                                                                                                                                                                                                          |
|                                   | Global Cognition:<br>moderator analysis                                              | Toril et al. 2014 [16]      | <input checked="" type="checkbox"/> COG <input type="checkbox"/> PHYS <input type="checkbox"/> DUAL | moderator effect<br>pooled estimate**<br>many (7 – 12) games**<br>few (1 – 6) games**                                                           | →      | Q(1) = 0.37, p > 0.05<br>d <sup>+</sup> = 0.37, p < 0.01, 95 % CI [0.26 to 0.48]<br>d <sup>+</sup> = 0.30, p < 0.01, 95 % CI [0.07 to 0.54]<br>d <sup>+</sup> = 0.39, p < 0.01, 95 % CI [0.26 to 0.51]                                                                                                                                                                                   |
|                                   | <input type="checkbox"/> Brain / Neurochemicals / HRV                                |                             |                                                                                                     |                                                                                                                                                 |        |                                                                                                                                                                                                                                                                                                                                                                                          |
|                                   |                                                                                      |                             |                                                                                                     |                                                                                                                                                 |        |                                                                                                                                                                                                                                                                                                                                                                                          |
|                                   |                                                                                      |                             |                                                                                                     |                                                                                                                                                 |        |                                                                                                                                                                                                                                                                                                                                                                                          |
|                                   | <input type="checkbox"/> Physical Outcomes, Mobility, and Activities of Daily Living |                             |                                                                                                     |                                                                                                                                                 |        |                                                                                                                                                                                                                                                                                                                                                                                          |
|                                   |                                                                                      |                             |                                                                                                     |                                                                                                                                                 |        |                                                                                                                                                                                                                                                                                                                                                                                          |
|                                   | <input type="checkbox"/> Psychosocial Outcomes                                       |                             |                                                                                                     |                                                                                                                                                 |        |                                                                                                                                                                                                                                                                                                                                                                                          |
|                                   |                                                                                      |                             |                                                                                                     |                                                                                                                                                 |        |                                                                                                                                                                                                                                                                                                                                                                                          |
|                                   |                                                                                      |                             |                                                                                                     |                                                                                                                                                 |        |                                                                                                                                                                                                                                                                                                                                                                                          |
| Specificity                       | <input checked="" type="checkbox"/> Cognition                                        |                             |                                                                                                     |                                                                                                                                                 |        |                                                                                                                                                                                                                                                                                                                                                                                          |
|                                   | Older Adults with mNCD/Dementia:                                                     |                             |                                                                                                     |                                                                                                                                                 |        |                                                                                                                                                                                                                                                                                                                                                                                          |
|                                   | Global Cognition:<br>subgroup analysis                                               | Bahar-Fuchs et al. 2019 [5] | <input checked="" type="checkbox"/> COG <input type="checkbox"/> PHYS <input type="checkbox"/> DUAL | pooled estimate*<br>single-domain training*<br>multi-domain training*<br>between-group difference                                               | →      | SMD <sup>+</sup> = 0.42, p < 0.001, 95 % CI [0.23 to 0.61], k = 27<br>SMD <sup>+</sup> = 0.35, p = 0.01, 95 % CI [0.1 to 0.59], k = 10<br>SMD <sup>+</sup> = 0.44, p = 0, 95 % CI [0.18 to 0.71], k = 17<br>Chi <sup>2</sup> = 0.28, p = 0.6, I <sup>2</sup> = 0 %                                                                                                                       |
|                                   | subgroup analysis                                                                    | Zhang et al. 2019 [8]       | <input checked="" type="checkbox"/> COG <input type="checkbox"/> PHYS <input type="checkbox"/> DUAL | pooled effect<br>single-domain training<br>multi-domain training*<br>between-group difference                                                   | ↑*     | g <sup>+</sup> = 0.30, p = 0.002, 95 % CI 0.11 to 0.50], k = 13<br>g <sup>+</sup> = 0.31, p = 0.23, 95 % CI [-0.19 to 0.81], k = 3<br>g <sup>+</sup> = 0.30, p = 0.008, 95 % CI [0.08 to 0.53], k = 10<br>Chi <sup>2</sup> = 0.00, p = 0.99, I <sup>2</sup> = 0 %                                                                                                                        |
|                                   | subgroup analysis                                                                    | Shermann et al. 2017 [14]   | <input checked="" type="checkbox"/> COG <input type="checkbox"/> PHYS <input type="checkbox"/> DUAL | pooled effect**<br>attention-specific<br>processing speed-specific<br>memory-specific*<br>multi-domain training**<br>between-group difference** | →      | g <sup>+</sup> = 0.420, p = 0.001, 95 % CI [0.182 to 0.659], k = 26<br>g <sup>+</sup> = 0.585, p = 0.212, 95 % CI [-0.334 to 1.504], k = 2<br>g <sup>+</sup> = 0.636, p = 0.120, 95 % CI [0.166 to 1.438], k = 2<br>g <sup>+</sup> = 0.671, p = 0.005, 95 % CI [0.207 to 1.136], k = 8<br>g <sup>+</sup> = 0.449, p = 0.005, 95 % CI [0.449 to 0.763], k = 14<br>Q(3) = 3.449, p = 0.001 |
|                                   | Complex Attention:<br>subgroup analysis                                              | Bahar-Fuchs et al. 2019 [5] | <input checked="" type="checkbox"/> COG <input type="checkbox"/> PHYS <input type="checkbox"/> DUAL | pooled estimate*<br>single-domain training<br>multi-domain training<br>between-group difference                                                 |        | SMD <sup>+</sup> = 0.56, p = 0.02, 95 % CI [0.07 to 0.95], k = 12<br>SMD <sup>+</sup> = 0.68, p = 0.10, 95 % CI [-0.14 to 1.49], k = 4<br>SMD <sup>+</sup> = 0.5, p = 0.12, 95 % CI [-0.14 to 1.15], k = 8<br>Chi <sup>2</sup> = 0.11, p = 0.74, I <sup>2</sup> = 0 %                                                                                                                    |
|                                   |                                                                                      |                             |                                                                                                     |                                                                                                                                                 |        |                                                                                                                                                                                                                                                                                                                                                                                          |
|                                   |                                                                                      |                             |                                                                                                     |                                                                                                                                                 |        |                                                                                                                                                                                                                                                                                                                                                                                          |

|                            |                                                                                      |                                |                                                                                                     |                                                                                                                                                                                                                                                                                                                                           |                                                                                                                                                                                                                                                                                                                                                                                                                                                                                                                                                                                                                                                                                                  |
|----------------------------|--------------------------------------------------------------------------------------|--------------------------------|-----------------------------------------------------------------------------------------------------|-------------------------------------------------------------------------------------------------------------------------------------------------------------------------------------------------------------------------------------------------------------------------------------------------------------------------------------------|--------------------------------------------------------------------------------------------------------------------------------------------------------------------------------------------------------------------------------------------------------------------------------------------------------------------------------------------------------------------------------------------------------------------------------------------------------------------------------------------------------------------------------------------------------------------------------------------------------------------------------------------------------------------------------------------------|
| Specificity<br>(continued) | Executive Function:<br>subgroup analysis                                             | Bahar-Fuchs et al.<br>2019 [5] | <input checked="" type="checkbox"/> COG <input type="checkbox"/> PHYS <input type="checkbox"/> DUAL | pooled estimate*<br>single-domain training<br>multi-domain training*<br>between-group difference* ↑*                                                                                                                                                                                                                                      | SMD <sup>+</sup> = 0.75, p = 0, 95 % CI [0.28 to 1.22], k = 12<br>SMD <sup>+</sup> = 0.08, p = 0.8, 95 % CI [-0.53 to 0.68], k = 3<br>SMD <sup>+</sup> = 0.99, p = 0, 95 % CI [0.44 to 1.55], k = 9<br>Chi <sup>2</sup> = 4.78, p = 0.03, I <sup>2</sup> = 79.08 %                                                                                                                                                                                                                                                                                                                                                                                                                               |
|                            | Learning and Memory:<br>subgroup analysis                                            | Bahar-Fuchs et al.<br>2019 [5] | <input checked="" type="checkbox"/> COG <input type="checkbox"/> PHYS <input type="checkbox"/> DUAL | <u>immediate memory:</u><br>pooled estimate*<br>single-domain training**<br>multi-domain training**<br>between-group difference<br><u>delayed memory:</u><br>pooled estimate*<br>single-domain training<br>multi-domain training*<br>between-group difference<br>pooled effect**<br>memory-specific training*<br>between group difference | SMD <sup>+</sup> = 0.74, p < 0.001, 95 % CI [0.04 to 1.02], k = 18<br>SMD <sup>+</sup> = 0.58, p = 0, 95 % CI [0.22 to 0.94], k = 7<br>SMD <sup>+</sup> = 0.8, p = 0, 95 % CI [0.24 to 1.35], k = 11<br>Chi <sup>2</sup> = 0.41, p = 0.52, I <sup>2</sup> = 0 %<br><br>SMD <sup>+</sup> = 0.81, p = 0, 95 % CI [0.29 to 1.32], k = 11<br>SMD <sup>+</sup> = 0.41, p = 0.12, 95 % CI [-0.11 to 0.94], k = 5<br>SMD <sup>+</sup> = 1.15, p = 0.01, 95 % CI [0.32 to 1.97], k = 6<br>Chi <sup>2</sup> = 2.15, p = 0.14, I <sup>2</sup> = 53.48 %<br>g <sup>+</sup> = 0.659, p = 0.000, 95 % CI [0.383 to 0.936], k = 20<br>g <sup>+</sup> = 1.219, p = 0.007, 95 % CI [0.338 to 2.100], k = 6<br>NR |
|                            | Language Fluency:<br>subgroup analysis                                               | Bahar-Fuchs et al.<br>2019 [5] | <input checked="" type="checkbox"/> COG <input type="checkbox"/> PHYS <input type="checkbox"/> DUAL | pooled estimate*<br>single-domain training<br>multi-domain training*<br>between-group difference* ↑*                                                                                                                                                                                                                                      | SMD <sup>+</sup> = 0.52, p = 0.0005, 95 % CI [0.23 to 0.81], k = 9<br>SMD <sup>+</sup> = 0.14, p = 0.49, 95 % CI [-0.25 to 0.52], k = 3<br>SMD <sup>+</sup> = 0.70, p < 0.0001, 95 % CI [0.38 to 1.02], k = 6<br>Chi <sup>2</sup> = 3.81, p = 0.03, I <sup>2</sup> = 79.22 %                                                                                                                                                                                                                                                                                                                                                                                                                     |
|                            | Healthy Older Adults:                                                                |                                |                                                                                                     |                                                                                                                                                                                                                                                                                                                                           |                                                                                                                                                                                                                                                                                                                                                                                                                                                                                                                                                                                                                                                                                                  |
|                            | Global cognition:<br>moderator analysis                                              | Mewborn et al. 2017<br>[13]    | <input checked="" type="checkbox"/> COG <input type="checkbox"/> PHYS <input type="checkbox"/> DUAL | moderator effect*<br>pooled estimate**<br>working memory train.**<br>memory training**<br>multi-domain training**<br>single-domain training**<br>processing speed train.*<br>attention training<br>execut. funct. train.<br>reasoning training                                                                                            | Q = 322.32, p = 0.035<br>g <sup>+</sup> = 0.298, p < 0.001, 95 % CI [0.25 to 0.35], k = 279<br>g <sup>+</sup> = 0.479, p < 0.001, 95 % CI [0.33 to 0.63], k = 56<br>g <sup>+</sup> = 0.349, p < 0.001, 95 % CI [0.24 to 0.46], k = 51<br>g <sup>+</sup> = 0.313, p < 0.001, 95 % CI [0.22 to 0.40], k = 106<br>g <sup>+</sup> = 0.288, p < 0.001, 95 % CI [0.23 to 0.35], k = 173<br>g <sup>+</sup> = 0.140, p < 0.05, 95 % CI [0.00 to 0.28], k = 28<br>g <sup>+</sup> = 0.169, p > 0.05, 95 % CI [-0.04 to 0.38], k = 7<br>g <sup>+</sup> = 0.125, p > 0.05, 95 % CI [-0.01 to 0.26], k = 24<br>g <sup>+</sup> = 0.081, p > 0.05, 95 % CI [-0.12 to 0.29], k = 7<br>Q(3) = 3.449, p = 0.001    |
|                            | moderator analysis                                                                   | Toril et al. 2014 [16]         | <input checked="" type="checkbox"/> COG <input type="checkbox"/> PHYS <input type="checkbox"/> DUAL | moderator effect<br>pooled estimate**<br>brain training**<br>video games**                                                                                                                                                                                                                                                                | d <sup>+</sup> = 0.37, p < 0.01, 95 % CI [0.26 to 0.48]<br>d <sup>+</sup> = 0.34, p < 0.01, 95 % CI [0.17 to 0.50]<br>d <sup>+</sup> = 0.40, p < 0.01, 95 % CI [0.25 to 0.55]                                                                                                                                                                                                                                                                                                                                                                                                                                                                                                                    |
|                            | subgroup analysis                                                                    | Lampit et al. 2014<br>[17]     | <input checked="" type="checkbox"/> COG <input type="checkbox"/> PHYS <input type="checkbox"/> DUAL | pooled estimate**<br>video games*<br>attention CCT*<br>speed of proc. CCT*<br>multidomain CCT*<br>working memory CCT<br>between-group heterog.                                                                                                                                                                                            | g <sup>+</sup> = 0.22, p < 0.001, 95 % CI [0.15 to 0.29], k = 52<br>g <sup>+</sup> = 0.42, p < 0.05, 95 % CI [0.09 to 0.76], k = 4<br>g <sup>+</sup> = 0.34, p < 0.05, 95 % CI [0.08 to 0.60], k = 6<br>g <sup>+</sup> = 0.25, p < 0.05, 95 % CI [0.10 to 0.39], k = 9<br>g <sup>+</sup> = 0.18, p < 0.05, 95 % CI [0.08 to 0.29], k = 23<br>g <sup>+</sup> = 0.17, p > 0.05, 95 % CI [-0.03 to 0.38], k = 9<br>p = 0.57                                                                                                                                                                                                                                                                         |
|                            | Learning and Memory:<br>subgroup analysis                                            | Bahar-Fuchs et al.<br>2019 [5] | <input checked="" type="checkbox"/> COG <input type="checkbox"/> PHYS <input type="checkbox"/> DUAL | <u>immediate memory:</u><br>pooled estimate*<br>single-domain training**<br>multi-domain training**<br>between-group difference<br><u>delayed memory:</u><br>pooled estimate*<br>single-domain training<br>multi-domain training*<br>between-group difference<br>pooled effect**<br>memory-specific training*<br>between group difference | SMD <sup>+</sup> = 0.74, p < 0.001, 95 % CI [0.04 to 1.02], k = 18<br>SMD <sup>+</sup> = 0.58, p = 0, 95 % CI [0.22 to 0.94], k = 7<br>SMD <sup>+</sup> = 0.8, p = 0, 95 % CI [0.24 to 1.35], k = 11<br>Chi <sup>2</sup> = 0.41, p = 0.52, I <sup>2</sup> = 0 %<br><br>SMD <sup>+</sup> = 0.81, p = 0, 95 % CI [0.29 to 1.32], k = 11<br>SMD <sup>+</sup> = 0.41, p = 0.12, 95 % CI [-0.11 to 0.94], k = 5<br>SMD <sup>+</sup> = 1.15, p = 0.01, 95 % CI [0.32 to 1.97], k = 6<br>Chi <sup>2</sup> = 2.15, p = 0.14, I <sup>2</sup> = 53.48 %<br>g <sup>+</sup> = 0.659, p = 0.000, 95 % CI [0.383 to 0.936], k = 20<br>g <sup>+</sup> = 1.219, p = 0.007, 95 % CI [0.338 to 2.100], k = 6<br>NR |
|                            | <input type="checkbox"/> Brain / Neurochemicals / HRV                                |                                |                                                                                                     |                                                                                                                                                                                                                                                                                                                                           |                                                                                                                                                                                                                                                                                                                                                                                                                                                                                                                                                                                                                                                                                                  |
|                            |                                                                                      |                                |                                                                                                     |                                                                                                                                                                                                                                                                                                                                           |                                                                                                                                                                                                                                                                                                                                                                                                                                                                                                                                                                                                                                                                                                  |
|                            | <input type="checkbox"/> Physical Outcomes, Mobility, and Activities of Daily Living |                                |                                                                                                     |                                                                                                                                                                                                                                                                                                                                           |                                                                                                                                                                                                                                                                                                                                                                                                                                                                                                                                                                                                                                                                                                  |
|                            |                                                                                      |                                |                                                                                                     |                                                                                                                                                                                                                                                                                                                                           |                                                                                                                                                                                                                                                                                                                                                                                                                                                                                                                                                                                                                                                                                                  |
|                            | <input type="checkbox"/> Psychosocial Outcomes                                       |                                |                                                                                                     |                                                                                                                                                                                                                                                                                                                                           |                                                                                                                                                                                                                                                                                                                                                                                                                                                                                                                                                                                                                                                                                                  |
|                            |                                                                                      |                                |                                                                                                     |                                                                                                                                                                                                                                                                                                                                           |                                                                                                                                                                                                                                                                                                                                                                                                                                                                                                                                                                                                                                                                                                  |

## 1 References

1. Bonnechère, B., C. Langley, and B.J. Sahakian, *The use of commercial computerised cognitive games in older adults: a meta-analysis*. Scientific Reports, 2020. **10**(1): p. 15276.
2. Chan, J.Y.C., et al., *Cognitive training interventions and depression in mild cognitive impairment and dementia: a systematic review and meta-analysis of randomized controlled trials*. Age Ageing, 2020. **49**(5): p. 738-747.
3. Mansor, N.S., C.M. Chow, and M. Halaki, *Cognitive effects of video games in older adults and their moderators: a systematic review with meta-analysis and meta-regression*. Aging Ment Health, 2020. **24**(6): p. 841-856.
4. Gates, N.J., et al., *Computerised cognitive training for 12 or more weeks for maintaining cognitive function in cognitively healthy people in late life*. Cochrane Database Syst Rev, 2020. **2**(2): p. Cd012277.
5. Bahar-Fuchs, A., et al., *Cognitive training for people with mild to moderate dementia*. Cochrane Database Syst Rev, 2019. **3**(3): p. Cd013069.
6. Gates, N.J., et al., *Computerised cognitive training for preventing dementia in people with mild cognitive impairment*. Cochrane Database Syst Rev, 2019. **3**(3): p. Cd012279.
7. Vaportzis, E., M.A. Niechcial, and A.J. Gow, *A systematic literature review and meta-analysis of real-world interventions for cognitive ageing in healthy older adults*. Ageing Res Rev, 2019. **50**: p. 110-130.
8. Zhang, H., et al., *Effect of computerised cognitive training on cognitive outcomes in mild cognitive impairment: a systematic review and meta-analysis*. BMJ Open, 2019. **9**(8): p. e027062.
9. Liang, J.H., et al., *Comparison of multiple interventions for older adults with Alzheimer disease or mild cognitive impairment: A PRISMA-compliant network meta-analysis*. Medicine (Baltimore), 2018. **97**(20): p. e10744.
10. Sala, G., K.S. Tatlidil, and F. Gobet, *Video game training does not enhance cognitive ability: A comprehensive meta-analytic investigation*. Psychological bulletin, 2018. **144**(2): p. 111.
11. García-Casal, J.A., et al., *Computer-based cognitive interventions for people living with dementia: a systematic literature review and meta-analysis*. Aging Ment Health, 2017. **21**(5): p. 454-467.
12. Hill, N.T., et al., *Computerized Cognitive Training in Older Adults With Mild Cognitive Impairment or Dementia: A Systematic Review and Meta-Analysis*. Am J Psychiatry, 2017. **174**(4): p. 329-340.
13. Mewborn, C.M., C.A. Lindbergh, and L. Stephen Miller, *Cognitive Interventions for Cognitively Healthy, Mildly Impaired, and Mixed Samples of Older Adults: A Systematic Review and Meta-Analysis of Randomized-Controlled Trials*. Neuropsychol Rev, 2017. **27**(4): p. 403-439.
14. Sherman, D.S., et al., *The Efficacy of Cognitive Intervention in Mild Cognitive Impairment (MNCD): a Meta-Analysis of Outcomes on Neuropsychological Measures*. Neuropsychol Rev, 2017. **27**(4): p. 440-484.
15. Melby-Lervåg, M., T.S. Redick, and C. Hulme, *Working Memory Training Does Not Improve Performance on Measures of Intelligence or Other Measures of "Far Transfer": Evidence*

- From a Meta-Analytic Review. Perspectives on Psychological Science*, 2016. **11**(4): p. 512-534.
16. Toril, P., J.M. Reales, and S. Ballesteros, *Video game training enhances cognition of older adults: a meta-analytic study*. Psychol Aging, 2014. **29**(3): p. 706-16.
  17. Lampit, A., H. Hallock, and M. Valenzuela, *Computerized cognitive training in cognitively healthy older adults: a systematic review and meta-analysis of effect modifiers*. PLoS medicine, 2014. **11**(11): p. e1001756.
  18. Karbach, J. and P. Verhaeghen, *Making working memory work: a meta-analysis of executive-control and working memory training in older adults*. Psychological science, 2014. **25**(11): p. 2027-2037.
  19. Biazus-Sehn, L.F., et al., *Effects of physical exercise on cognitive function of older adults with mild cognitive impairment: A systematic review and meta-analysis*. Arch Gerontol Geriatr, 2020. **89**: p. 104048.
  20. Chen, F.T., et al., *Effects of Exercise Training Interventions on Executive Function in Older Adults: A Systematic Review and Meta-Analysis*. Sports Med, 2020. **50**(8): p. 1451-1467.
  21. Zhou, X.L., et al., *Effects of exercise interventions for specific cognitive domains in old adults with mild cognitive impairment: A meta-analysis and subgroup analysis of randomized controlled trials*. Medicine (Baltimore), 2020. **99**(31): p. e20105.
  22. Law, C.-K., et al., *Physical exercise attenuates cognitive decline and reduces behavioural problems in people with mild cognitive impairment and dementia: a systematic review*. Journal of Physiotherapy, 2020. **66**(1): p. 9-18.
  23. Jia, R.X., et al., *Effects of physical activity and exercise on the cognitive function of patients with Alzheimer disease: a meta-analysis*. BMC Geriatr, 2019. **19**(1): p. 181.
  24. Marinus, N., et al., *The Impact of Different Types of Exercise Training on Peripheral Blood Brain-Derived Neurotrophic Factor Concentrations in Older Adults: A Meta-Analysis*. Sports Med, 2019. **49**(10): p. 1529-1546.
  25. Raffin, J., et al., *Exercise Frequency Determines Heart Rate Variability Gains in Older People: A Meta-Analysis and Meta-Regression*. Sports Med, 2019. **49**(5): p. 719-729.
  26. Sanders, L.M.J., et al., *Dose-response relationship between exercise and cognitive function in older adults with and without cognitive impairment: A systematic review and meta-analysis*. PLoS One, 2019. **14**(1): p. e0210036.
  27. Wang, S., et al., *Efficacy of different types of exercises on global cognition in adults with mild cognitive impairment: a network meta-analysis*. Aging Clin Exp Res, 2019. **31**(10): p. 1391-1400.
  28. Firth, J., et al., *Effect of aerobic exercise on hippocampal volume in humans: a systematic review and meta-analysis*. Neuroimage, 2018. **166**: p. 230-238.
  29. Lam, F.M., et al., *Physical exercise improves strength, balance, mobility, and endurance in people with cognitive impairment and dementia: a systematic review*. J Physiother, 2018. **64**(1): p. 4-15.
  30. Northey, J.M., et al., *Exercise interventions for cognitive function in adults older than 50: a systematic review with meta-analysis*. Br J Sports Med, 2018. **52**(3): p. 154-160.

31. Panza, G.A., et al., *Can Exercise Improve Cognitive Symptoms of Alzheimer's Disease?* Journal of the American Geriatrics Society, 2018. **66**(3): p. 487-495.
32. de Souto Barreto, P., et al., *Exercise Training for Preventing Dementia, Mild Cognitive Impairment, and Clinically Meaningful Cognitive Decline: A Systematic Review and Meta-analysis.* J Gerontol A Biol Sci Med Sci, 2018. **73**(11): p. 1504-1511.
33. Sherrington, C., et al., *Exercise to prevent falls in older adults: an updated systematic review and meta-analysis.* Br J Sports Med, 2017. **51**(24): p. 1750-1758.
34. Kelly, M.E., et al., *The impact of exercise on the cognitive functioning of healthy older adults: a systematic review and meta-analysis.* Ageing Res Rev, 2014. **16**: p. 12-31.
35. Forbes, D., et al., *Exercise programs for people with dementia.* Cochrane Database Syst Rev, 2015(4): p. Cd006489.
36. Groot, C., et al., *The Effect of Physical Activity on Cognitive Function in Patients with Dementia: A Meta-Analysis of Randomized Control Trials.* Ageing research reviews, 2015. **25**.
37. Ströhle, A., et al., *Drug and Exercise Treatment of Alzheimer Disease and Mild Cognitive Impairment: A Systematic Review and Meta-Analysis of Effects on Cognition in Randomized Controlled Trials.* Am J Geriatr Psychiatry, 2015. **23**(12): p. 1234-1249.
38. Corregidor-Sánchez, A.I., et al., *Effectiveness of virtual reality technology on functional mobility of older adults: systematic review and meta-analysis.* Age and Ageing, 2020. **50**(2): p. 370-379.
39. Gavelin, H.M., et al., *Combined physical and cognitive training for older adults with and without cognitive impairment: A systematic review and network meta-analysis of randomized controlled trials.* Ageing Res Rev, 2021. **66**: p. 101232.
40. Chan, J.S.Y., et al., *The effectiveness of dance interventions on cognition in patients with mild cognitive impairment: A meta-analysis of randomized controlled trials.* Neuroscience & Biobehavioral Reviews, 2020. **118**: p. 80-88.
41. Pacheco, T.B.F., et al., *Effectiveness of exergames for improving mobility and balance in older adults: a systematic review and meta-analysis.* Syst Rev, 2020. **9**(1): p. 163.
42. Zhu, Y., et al., *Effects of Aerobic Dance on Cognition in Older Adults with Mild Cognitive Impairment: A Systematic Review and Meta-Analysis.* J Alzheimers Dis, 2020. **74**(2): p. 679-690.
43. Wu, C., et al., *Effects of Mind-Body Exercises on Cognitive Function in Older Adults: A Meta-Analysis.* J Am Geriatr Soc, 2019. **67**(4): p. 749-758.
44. Stanmore, E., et al., *The effect of active video games on cognitive functioning in clinical and non-clinical populations: A meta-analysis of randomized controlled trials.* Neurosci Biobehav Rev, 2017. **78**: p. 34-43.
45. Howes, S.C., et al., *Gaming for Health: Systematic Review and Meta-analysis of the Physical and Cognitive Effects of Active Computer Gaming in Older Adults.* Physical Therapy, 2017. **97**(12): p. 1122-1137.
46. Gomes-Osman, J., et al., *Exercise for cognitive brain health in aging: A systematic review for an evaluation of dose.* Neurol Clin Pract, 2018. **8**(3): p. 257-265.
